# Supplementary material for: Asymmetric total synthesis of (+)-propolisbenzofuran B
Source: Royal Society of Chemistry journal article supplement (doi:10.1039/d3cc02054a), 2023-01-01

# Electronic Supplementary Information

## Asymmetric total synthesis of (+)-propolisbenzofuran B

Biswajit Sen<sup>a,b</sup> Mainak Bera,<sup>a</sup> Maya Shankar Singh,<sup>b</sup> and Saumen Hajra\*<sup>a</sup>

<sup>a</sup> Center of Biomedical Research, Sanjay Gandhi Post-Graduate Institute of Medical Sciences Campus, Raebareli Road, Lucknow 226014, India

<sup>b</sup> Department of Chemistry, Institute of Science, Banaras Hindu University, Varanasi 221005, UP, India

.....

### Table of Contents

|    |                                                                                                                                                                                                                                                               |         |
|----|---------------------------------------------------------------------------------------------------------------------------------------------------------------------------------------------------------------------------------------------------------------|---------|
| 1  | General Information                                                                                                                                                                                                                                           | S2      |
| 2  | Table SI1. Comparison of <sup>13</sup> C (recorded in Acetone- <i>d</i> <sub>6</sub> ) and <sup>1</sup> H NMR (recorded in Acetone- <i>d</i> <sub>6</sub> ) Chemical Shifts and Coupling Constants of Natural & Synthetic Samples of (+)-Propolisbenzofuran B | S2-4    |
| 3  | Table SI2. Optical rotation and melting point comparison chart of the synthesized (+)-Propolisbenzofuran B                                                                                                                                                    | S5      |
| 4  | Experimental procedures and characterization data for the synthesis of (+)-Propolisbenzofuran B                                                                                                                                                               | S5-S23  |
| 5  | Table SI3. Screening of reaction conditions for the deacetylative tandem Sonogashira-annulation reaction of <b>5</b> and <b>6</b>                                                                                                                             | S7      |
| 6  | Table SI4. Screening for acetylation of bromo-compound <b>2/2'</b>                                                                                                                                                                                            | S16     |
| 7  | Table SI5: Screening for benzylic oxidation of <b>2/14</b>                                                                                                                                                                                                    | S18     |
| 9  | Experimental procedure and related data for attempted organocatalytic asymmetric aldol reactions                                                                                                                                                              | S24-S27 |
| 10 | Table SI6. Attempted organocatalytic asymmetric aldol reactions                                                                                                                                                                                               | S26     |
| 11 | HPLC chromatogram of aldol product <b>2</b>                                                                                                                                                                                                                   | S28     |
| 12 | References                                                                                                                                                                                                                                                    | S29     |
| 13 | <sup>1</sup> H-, <sup>13</sup> C-, DEPT 135, 2D-NOESY, HSQC and HMBC NMR spectra                                                                                                                                                                              | S30-S84 |

**General Information:** All the reactions were carried out using oven-dried glassware under an atmosphere of argon (Ar). All reagents were used as purchased from commercial suppliers without further purification. Solvents were dried and distilled following usual protocols. Heating reactions were performed in a silicon oil bath at the specified temperature. Flash column chromatography was performed in all cases using the indicated solvent system on purchased silica gel (230–400 mesh). Analytical thin-layer chromatography was performed using 60 F254 precoated silica gel plates (0.2 mm thickness), and compounds were visualized by irradiation of UV light. The  $^1\text{H}$  NMR, and  $^{13}\text{C}$  NMR spectra were measured with Bruker 400 (400 MHz) or 800 (800 MHz) using  $\text{CDCl}_3$ ,  $\text{DMSO-}d_6$  and  $\text{Acetone-}d_6$ .  $^1\text{H}$  NMR chemicals shift are expressed in ppm( $\delta$ ) relative to  $\delta = 7.26$  for  $\text{CDCl}_3$ ,  $\delta = 2.50$  for  $\text{DMSO-}d_6$  and  $\delta = 2.05$  for  $\text{Acetone-}d_6$ .  $^{13}\text{C}$  NMR chemical shift are expressed in ppm( $\delta$ ) relative to  $\delta = 77.00$  for  $\text{CDCl}_3$ ,  $\delta = 39.51$  for  $\text{DMSO-}d_6$  and  $\delta = 29.8$  for  $\text{Acetone-}d_6$ . Electrospray ionization (ESI) mass spectrometry (MS) experiments were performed on Agilent Technologies 6530 Accurate-Mass Q-TOF LC/MS. Enantiomeric excess (*ee*) was measured by HPLC analysis with chiral stationary phase. Infrared Spectra were recorded on a PerkinElmer FT-IR C91507. Organocatalysts and chiral auxiliaries were prepared according to literature procedures<sup>3-5</sup> and optical rotation was checked before use.

**Table SII. Comparison of  $^{13}\text{C}$  (recorded in  $\text{Acetone-}d_6$ ) and  $^1\text{H}$  NMR (recorded in  $\text{Acetone-}d_6$ ) Chemical Shifts and Coupling Constants of Natural & Synthetic Samples of Propolisbenzofuran B**

| 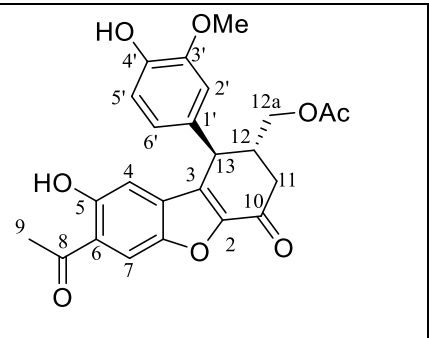 |                                          | propolisbenzofuran B (1)       |                               |                                |
|-------------------------------------------------------------------------------------|------------------------------------------|--------------------------------|-------------------------------|--------------------------------|
| C(n)                                                                                | Isolated natural product (+)-1 (100 MHz) | (±)-1; Thomson Group (125 MHz) | (±)-1; Ramana Group (125 MHz) | (+)-1, present study (100 MHz) |
| 2                                                                                   | 151.7                                    | 151.8                          | 151.9                         | 152.0                          |
| 3                                                                                   | 135.0                                    | 135.1                          | 135.1                         | 135.2                          |

|            |                                                        |                                            |                                              |                                            |
|------------|--------------------------------------------------------|--------------------------------------------|----------------------------------------------|--------------------------------------------|
| 3a         | 134.0                                                  | 134.1                                      | 134.2                                        | 134.3                                      |
| 4          | 110.0                                                  | 110.0                                      | 110.1                                        | 110.2                                      |
| 5          | 158.2                                                  | 158.2                                      | 158.3                                        | 158.4                                      |
| 6          | 120.5                                                  | 120.6                                      | 120.6                                        | 120.7                                      |
| 7          | 115.5                                                  | 115.6                                      | 115.6                                        | 115.7                                      |
| 7a         | 149.5                                                  | 149.6                                      | 149.7                                        | 149.8                                      |
| 8          | 205.8                                                  | 205.0                                      | 206.0                                        | 206.5                                      |
| 9          | 27.3                                                   | 27.4                                       | 27.4                                         | 27.5                                       |
| 10         | 187.5                                                  | 187.6                                      | 187.6                                        | 187.7                                      |
| 11         | 42.3                                                   | 42.4                                       | 42.4                                         | 42.5                                       |
| 12         | 44.9                                                   | 44.9                                       | 45.0                                         | 45.1                                       |
| 12a        | 65.2                                                   | 65.2                                       | 65.3                                         | 65.4                                       |
| 13         | 43.1                                                   | 43.1                                       | 43.2                                         | 43.3                                       |
| 1'         | 131.1                                                  | 131.7                                      | 131.7                                        | 131.8                                      |
| 2'         | 112.9                                                  | 112.9                                      | 113.0                                        | 113.1                                      |
| 3'         | 148.9                                                  | 148.9                                      | 149.0                                        | 149.1                                      |
| 4'         | 147.2                                                  | 147.2                                      | 147.3                                        | 147.4                                      |
| 5'         | 116.1                                                  | 116.1                                      | 116.2                                        | 116.3                                      |
| 6'         | 122.5                                                  | 122.5                                      | 122.6                                        | 122.7                                      |
| OMe        | 56.3                                                   | 56.3                                       | 56.4                                         | 56.5                                       |
| OAc        | 20.6                                                   | 20.7                                       | 20.7                                         | 20.8                                       |
|            | 170.8                                                  | (not given)                                | 171.0                                        | 171.1                                      |
|            |                                                        |                                            |                                              |                                            |
| C(n)-<br>H | Isolated natural<br>product (+)- <b>1</b> (100<br>MHz) | (±)- <b>1</b> ; Thomson<br>Group (125 MHz) | (±)- <b>1</b> ; Ramana<br>Group (125<br>MHz) | (+)- <b>1</b> , present<br>study (100 MHz) |
| 4          | 6.13 s                                                 | 6.14 (s)                                   | 6.14 (s, 1H)                                 | 6.17 (s, 1H)                               |
| 7          | 8.21 s                                                 | 8.24 (s, 1H)                               | 8.21 (s, 1H)                                 | 8.23 (s, 1H)                               |

|          |                              |                            |                                                                         |                                                                        |
|----------|------------------------------|----------------------------|-------------------------------------------------------------------------|------------------------------------------------------------------------|
| 9        | 2.75 s                       | 2.76 (s, 3H)               | 2.76 (s, 3H)                                                            | 2.77 (s, 3H)                                                           |
| 11       | 2.86 (m, 2H)                 | 2.81 (m, 2H)               | 2.82 (dd, $J = 4.4, 16.3$ Hz, 1H)<br>2.87 (dd, $J = 11.9, 16.3$ Hz, 1H) | 2.88- 2.85 (m, 2H)                                                     |
| 12       | 2.94 m                       | 2.96 m                     | 2.92–2.97 (m, 1H)                                                       | 2.99–2.94 (m, 1H)                                                      |
| 12a      | 4.05 (m, 2H)                 | 4.05 (t, $J = 4.5$ Hz, 2H) | 4.04 (dd, $J = 5.7, 11.3$ Hz, 1H)<br>4.07 (dd, $J = 3.6, 11.3$ Hz, 1H)  | 4.06 (dd, $J = 5.4, 11.4$ Hz, 1H)<br>4.10 (dd, $J = 3.7, 11.2$ Hz, 1H) |
| 13       | 4.33 (d, $J = 9.9$ Hz)       | 4.35 (d, $J = 9.9$ Hz, 2H) | 4.34 (d, $J = 10.0$ Hz, 1H)                                             | 4.37 (d, $J = 9.8$ Hz, 1H)                                             |
| 2'       | 7.02 (d, $J = 2.0$ Hz)       | 7.03 b s                   | 7.03 (br. s, 1H)                                                        | 7.04 (d, $J = 1.6$ Hz, 1H)                                             |
| 5'       | 6.89 (d, $J = 8.0$ Hz)       | 6.88 (d, $J = 1.7$ Hz, 2H) | 6.89 (d, $J = 8.1$ Hz, 1H)                                              | 6.91 (d, $J = 8.0$ Hz, 1H)                                             |
| 6'       | 6.87 (dd, $J = 8.0, 2.0$ Hz) | 6.88 (d, $J = 1.7$ Hz, 2H) | 6.87 (dd, $J = 1.6, 8.1$ Hz, 1H)                                        | 6.88 (d, $J = 8.0$ Hz, 1H)                                             |
| OMe      | 3.73 s                       | 3.75 (s)                   | 3.76 (s, 3H)                                                            | 3.78 (s, 3H)                                                           |
| OAc      | 2.03 s                       | 2.04 (s)                   | 2.04 (s, 3H)                                                            | 2.07 (s, 3H)                                                           |
| C(4')–OH | 8.01 b s                     | 7.75 s                     | 7.69 (s, 1H)                                                            | 7.68 (s, 1H)                                                           |
| C(5)–OH  | 11.81 s                      | 11.82 (s, 1H)              | 11.81 (s, 1H)                                                           | 11.81 (s, 1H)                                                          |

**Table SI2: Optical rotation and melting point comparison chart of the synthesized Propolisbenzofuran B**

| <b>Propolisbenzofuran B</b> | Isolated natural product (+)- <b>1</b> (100 MHz) | (±)- <b>1</b> ; Thomson Group (125 MHz) | (±)- <b>1</b> ; Ramana Group (125 MHz) | (+)- <b>1</b> , present study (100 MHz) |
|-----------------------------|--------------------------------------------------|-----------------------------------------|----------------------------------------|-----------------------------------------|
| <b>Melting point (°C)</b>   | Not reported                                     | Not reported                            | 199-200                                | 198-200                                 |
| <b>Optical rotation</b>     | +38.4 (c 0.08, CHCl <sub>3</sub> )               | Not applicable                          | Not applicable                         | +36.2 (c 0.36, CHCl <sub>3</sub> )      |

**Synthesis of 2,5-dibromo-1,4-hydroquinone (5a) and its O-acetyl derivative (5b)**

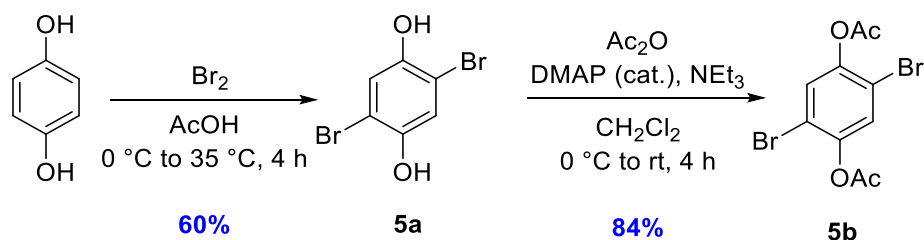

2,5-Dibromo-1,4-hydroquinone was synthesized according to a literature procedure.<sup>1</sup> In a 250 mL two-neck flask, hydroquinone (20 g, 182 mmol) was dissolved in 180 mL glacial acetic acid. Bromine (19.3 mL, 373 mmol) in 50 mL glacial acetic acid was then added dropwise at 0 °C. After stirring for 4 h at 35 °C. The suspension was filtered, and the solid was washed with cold glacial acetic acid. Recrystallization from glacial acetic acid gave 2,5-dibromohydroquinone **5a** as a white solid (29.2 g, 60% yield).

To a solution of **5a** (20 g, 74.63 mmol) in CH<sub>2</sub>Cl<sub>2</sub> (400 mL) was added acetic anhydride (14.8 mL, 156.8 mmol), DMAP (1.82 g, 14.93 mmol) at 0 °C followed by triethylamine (26 mL, 186.6 mmol), then the mixture was stirred at room temperature. The reaction mixture was treated with aqueous ammonium chloride and extracted with CH<sub>2</sub>Cl<sub>2</sub> (3

x 100 mL). The organic layer was washed with brine and dried (Na<sub>2</sub>SO<sub>4</sub>). The solvent was evaporated under reduced pressure. The crude product was washed with Et<sub>2</sub>O (3×50 mL) to afford **5b** as a white solid (22 g, 84%). **MP**: 154-156 °C; **R<sub>f</sub>** = 0.5 (PE: EA= 9:1); **<sup>1</sup>H NMR (400 MHz, Chloroform-*d*)** δ 7.40 (s, 2H), 2.35 (s, 6H); **<sup>13</sup>C NMR (100 MHz, Chloroform-*d*)** δ 168.0, 146.4, 127.7, 115.2, 20.7; **IR (cm<sup>-1</sup>)** 1764, 1471, 1427, 1370, 1202, 1164, 1010; **HRMS(ESI-TOF) m/z** [M+Na]<sup>+</sup> calcd for C<sub>10</sub>H<sub>8</sub><sup>79</sup>Br<sub>2</sub>NaO<sub>4</sub><sup>+</sup>/ C<sub>10</sub>H<sub>8</sub><sup>79</sup>Br<sup>81</sup>BrNaO<sub>4</sub><sup>+</sup>/ C<sub>10</sub>H<sub>8</sub><sup>81</sup>Br<sub>2</sub>BrNaO<sub>4</sub><sup>+</sup> 372.8682, 374.8661, and 376.8641; found 372.8681, 374.8663, and 376.8643 respectively.

### Synthesis of 4-*tert*-butyldimethylsiloxyhex-5-yne (**6a**)

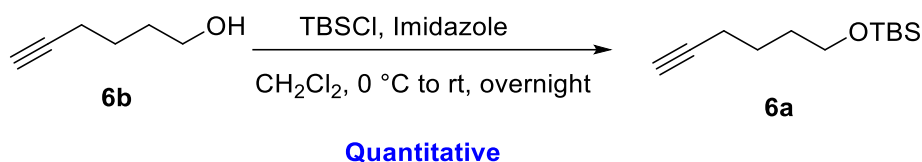

To a solution of hex-5-yn-1-ol **6b** (20 g, 204.0 mmol, 1 equiv.) in CH<sub>2</sub>Cl<sub>2</sub> (200 mL), was added imidazole (20.8 g, 306 mmol, 1.5 equiv.) followed by the addition of *tert*-butyldimethylsilyl chloride (36.9 g, 244.8 mmol, 1.2 equiv.) at 0 °C. The resulting mixture was allowed to warm to room temperature and stirred overnight. The reaction was quenched with a saturated aqueous NH<sub>4</sub>Cl solution, and the aqueous phase was extracted with CH<sub>2</sub>Cl<sub>2</sub>. The combined organic layers were washed with brine, dried over Na<sub>2</sub>SO<sub>4</sub>, filtered and concentrated *in vacuo*. The crude mixture was purified by silica gel column chromatography (PE/EA = 19:1) to afford **6a** (42.48 g, quantitative) as a colourless oil. The characterization data were identical to those previously reported.<sup>6</sup>

**<sup>1</sup>H NMR (400 MHz, Chloroform-*d*)** δ 3.63 (t, *J* = 6.0 Hz, 2H), 2.21 (td, *J* = 6.7, 2.6 Hz, 2H), 1.93 (t, *J* = 2.6 Hz, 1H), 1.67 – 1.54 (m, 4H), 0.89 (s, 9H), 0.04 (s, 6H).; **<sup>13</sup>C NMR (100 MHz, Chloroform-*d*)** δ 84.5, 68.2, 62.6, 31.8, 25.9, 24.9, 18.3, 18.2, -5.3; **IR (cm<sup>-1</sup>)** 3315, 2956, 2931, 2856, 1471, 1256, 1106.

**Table S13. Screening of reaction conditions for the deacetylative tandem Sonogashira-annulation reaction of 5 and 6**

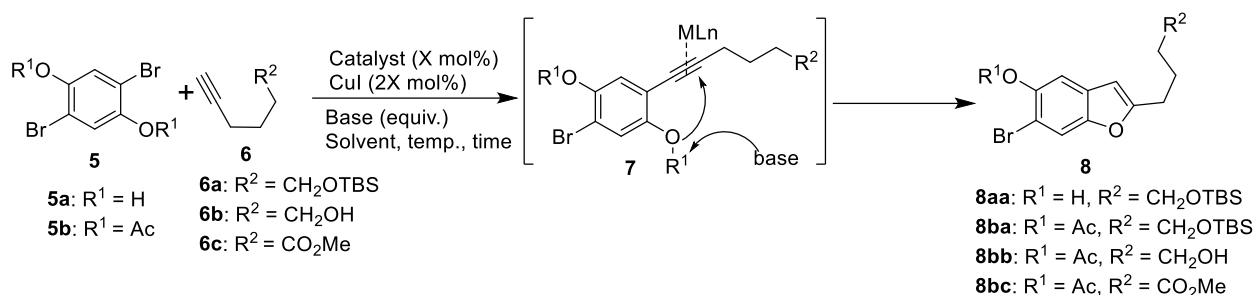

| Entry | 5/6                         | Catalyst (mol%)                                                                                                     | Ligand                                                             | Base (equiv.)                                                                      | Solvent                     | t (°C)   | T (h)    | Product        | Yield (%) |
|-------|-----------------------------|---------------------------------------------------------------------------------------------------------------------|--------------------------------------------------------------------|------------------------------------------------------------------------------------|-----------------------------|----------|----------|----------------|-----------|
| 1     | <b>5a/6a</b>                | Pd(PPh <sub>3</sub> ) <sub>4</sub> /Pd(OAc) <sub>2</sub> /PdCl <sub>2</sub> (PPh <sub>3</sub> ) <sub>2</sub> / (10) | --/ PPh <sub>3</sub> / P( <i>o</i> -tolyl) <sub>3</sub>            | Cs <sub>2</sub> CO <sub>3</sub> /Et <sub>3</sub> N /K <sub>3</sub> PO <sub>4</sub> | DMF/ THF /ACN               | 50-80    | 24 to 48 | NDP            | --        |
| 2     | <b>5b/6a</b>                | Pd(PPh <sub>3</sub> ) <sub>4</sub> /Pd(OAc) <sub>2</sub> / (10)                                                     | --/ PPh <sub>3</sub> / P( <i>o</i> -tolyl) <sub>3</sub>            | Cs <sub>2</sub> CO <sub>3</sub> /Et <sub>3</sub> N /K <sub>3</sub> PO <sub>4</sub> | DMF/ THF /ACN               | 50-80    | 24 to 48 | NDP            | --        |
| 3     | <b>5b/6a</b>                | PdCl <sub>2</sub> (PPh <sub>3</sub> ) <sub>2</sub> (10)                                                             | --                                                                 | Cs <sub>2</sub> CO <sub>3</sub> / K <sub>3</sub> PO <sub>4</sub> / DIPEA           | DMF/ THF /ACN               | 50 to 80 | 24 to 48 | <b>7ba/8ba</b> | Traces    |
| 4     | <b>5b/6a</b>                | PdCl <sub>2</sub> (PPh <sub>3</sub> ) <sub>2</sub> (10)                                                             | --                                                                 | Et <sub>3</sub> N (4)                                                              | DMF                         | 80       | 24       | <b>8ba</b>     | 18        |
| 5     | <b>5b/6a</b>                | PdCl <sub>2</sub> (PPh <sub>3</sub> ) <sub>2</sub> (10)                                                             | --                                                                 | Et <sub>3</sub> N                                                                  | Et <sub>3</sub> N:DMF (1:1) | 80       | 24       | <b>8ba</b>     | 36        |
| 6     | <b>5b/6a</b>                | PdCl <sub>2</sub> (PPh <sub>3</sub> ) <sub>2</sub> (10)                                                             | --                                                                 | Et <sub>3</sub> N                                                                  | Et <sub>3</sub> N:THF (1:1) | 80       | 24       | <b>8ba</b>     | 22        |
| 7     | <b>5b/6a</b>                | PdCl <sub>2</sub> (PPh <sub>3</sub> ) <sub>2</sub> (10)                                                             | --                                                                 | Et <sub>3</sub> N                                                                  | Et <sub>3</sub> N           | 80       | 30       | <b>8ba</b>     | 65        |
| 8     | <b>5b/6a</b>                | PdCl <sub>2</sub> (PPh <sub>3</sub> ) <sub>2</sub> (2)                                                              | --                                                                 | Et <sub>3</sub> N                                                                  | Et <sub>3</sub> N           | 80       | 30       | <b>8ba</b>     | 65        |
| 9     | <b>5b/6a</b>                | PdCl <sub>2</sub> (PPh <sub>3</sub> ) <sub>2</sub> (1)                                                              | --                                                                 | Et <sub>3</sub> N                                                                  | Et <sub>3</sub> N           | 80       | 30       | <b>8ba</b>     | 52        |
| 10    | <b>5b/6a</b>                | PdCl <sub>2</sub> (PPh <sub>3</sub> ) <sub>2</sub> (2)                                                              | PPh <sub>3</sub>                                                   | Et <sub>3</sub> N                                                                  | Et <sub>3</sub> N           | 80       | 24       | <b>8ba</b>     | 72        |
| 11    | <b>5b/6a</b>                | PdCl <sub>2</sub> (PPh <sub>3</sub> ) <sub>2</sub> (2)                                                              | P( <i>o</i> -tolyl) <sub>3</sub>                                   | Et <sub>3</sub> N                                                                  | Et <sub>3</sub> N           | 80       | 24       | <b>8ba</b>     | 78        |
| 12    | <b>5b/6a</b>                | PdCl <sub>2</sub> (PPh <sub>3</sub> ) <sub>2</sub> (2)                                                              | (CH <sub>2</sub> ) <sub>4</sub> (PPh <sub>2</sub> ) <sub>2</sub>   | Et <sub>3</sub> N                                                                  | Et <sub>3</sub> N           | 80       | 24       | <b>8ba</b>     | 44        |
| 13    | <b>5b/6a</b>                | PdCl <sub>2</sub> (PPh <sub>3</sub> ) <sub>2</sub> (2)                                                              | PCy <sub>3</sub>                                                   | Et <sub>3</sub> N                                                                  | Et <sub>3</sub> N           | 80       | 24       | <b>8ba</b>     | 76        |
| 14    | <b>5b/6a</b>                | PdCl <sub>2</sub> (PPh <sub>3</sub> ) <sub>2</sub> (2)                                                              | P( <i>t</i> -Bu) <sub>3</sub>                                      | Et <sub>3</sub> N                                                                  | Et <sub>3</sub> N           | 80       | 24       | <b>8ba</b>     | 73        |
| 15    | <b>5b/6a</b>                | PdCl <sub>2</sub> (PPh <sub>3</sub> ) <sub>2</sub> (2)                                                              | 1,2-(Ph <sub>2</sub> P) <sub>2</sub> C <sub>6</sub> H <sub>4</sub> | Et <sub>3</sub> N                                                                  | Et <sub>3</sub> N           | 80       | 24       | <b>8ba</b>     | 12        |
| 16    | <b>5b/6b</b>                | PdCl <sub>2</sub> (PPh <sub>3</sub> ) <sub>2</sub> (2)                                                              | P( <i>o</i> -tolyl) <sub>3</sub>                                   | Et <sub>3</sub> N                                                                  | Et <sub>3</sub> N           | 80       | 48       | <b>8bb</b>     | 32        |
| 17    | <b>5b/6c</b>                | PdCl <sub>2</sub> (PPh <sub>3</sub> ) <sub>2</sub> (2)                                                              | P( <i>o</i> -tolyl) <sub>3</sub>                                   | Et <sub>3</sub> N                                                                  | Et <sub>3</sub> N           | 80       | 24       | <b>8bc</b>     | 40        |
| 18    | <b>5b/6a</b><br>(2 g scale) | PdCl <sub>2</sub> (PPh <sub>3</sub> ) <sub>2</sub> (2)                                                              | P( <i>o</i> -tolyl) <sub>3</sub>                                   | Et <sub>3</sub> N                                                                  | Et <sub>3</sub> N           | 80       | 32       | <b>8ba</b>     | 72        |

## Synthesis of 6-bromo-2-(4-((*tert*-butyldimethylsilyl)oxy)butyl)benzofuran-5-yl acetate (**8ba**)

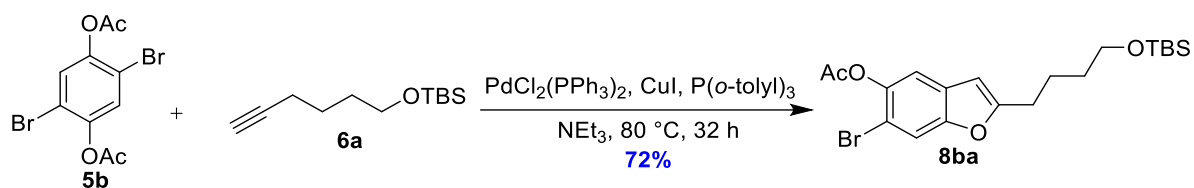

4-*tert*-Butyldimethylsilyloxyhex-5-yne **6a** (3.14 g, 14.77 mmol) was added to the mixture of *O*-acetyl-2,5-dibromo-1,4-hydroquinone **5b** (4 g, 11.36 mmol),  $\text{PdCl}_2(\text{Ph}_3\text{P})_2$  (160 mg, 0.23 mmol),  $\text{CuI}$  (108 mg, 0.57 mmol),  $\text{P}(o\text{-tolyl})_3$  (174 mg, 0.57 mmol) and triethylamine (114 mL) at rt under  $\text{N}_2$  atmosphere. The mixture was heated at  $80\text{ }^\circ\text{C}$  for 32 h under stirring. The resulting mixture was then cooled to rt and diluted with ethyl acetate (200 mL), filtered through a pad of 230-400 silica gel, filtrate part was washed with saturated aqueous  $\text{NH}_4\text{Cl}$  solution ( $2\times 100\text{ mL}$ ) followed by water ( $2\times 50\text{ mL}$ ) and brine. Then the resulting solution was dried over anhydrous  $\text{Na}_2\text{SO}_4$ . After the removal of the solvent under reduced pressure, the residue was purified by column chromatography on silica gel with petroleum-ethyl acetate (19:1) as the eluent to give compound **8ba** as a yellowish liquid. **Yield:** 3.61 g (72%).  **$^1\text{H NMR}$  (400 MHz, Chloroform-*d*)**  $\delta$  7.64 (d,  $J = 0.9\text{ Hz}$ , 1H), 7.21 (s, 1H), 6.35 (d,  $J = 0.9\text{ Hz}$ , 1H), 3.65 (t,  $J = 6.3\text{ Hz}$ , 2H), 2.76 (t,  $J = 7.6\text{ Hz}$ , 2H), 2.37 (s, 3H), 1.79 (p,  $J = 7.4\text{ Hz}$ , 2H), 1.60 (p,  $J = 6.1\text{ Hz}$ , 2H), 0.90 (s, 9H), 0.05 (s, 6H);  **$^{13}\text{C NMR}$  (100 MHz, Chloroform-*d*)**  $\delta$  169.2, 161.7, 152.5, 143.5, 129.2, 115.1, 114.1, 110.4, 102.1, 62.7, 32.1, 28.2, 26.0, 24.0, 20.8, 18.4, -5.3; **IR (cm $^{-1}$ )** 2956, 2929, 2859, 1775, 1451, 1370, 1202, 1165, 1103. **HRMS(ESI-TOF)  $m/z$**   $[\text{M}+\text{Na}]^+$  calcd for  $\text{C}_{20}\text{H}_{29}^{79}\text{BrNaO}_4\text{Si}^+$  /  $\text{C}_{20}\text{H}_{29}^{81}\text{BrNaO}_4\text{Si}^+$  463.0911, and 465.0890; found 463.0910, and 465.0898 respectively.

## Synthesis of 6-bromo-2-(4-hydroxybutyl)benzofuran-5-yl acetate (**8bb**)

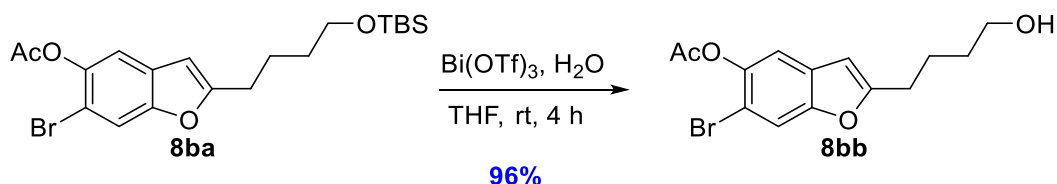

To a solution of **8ba** (3.5 g, 7.95 mmol) in THF (80 mL) were successively added distilled  $\text{H}_2\text{O}$  (72  $\mu\text{L}$ , 5 equiv.) and  $\text{Bi}(\text{OTf})_3$  (525 mg, 0.8 mmol). Then the reaction mixture was vigorously stirred at rt for 4 h. Complete consumption of the starting material was monitored by TLC (40% EA in PE). THF was then evaporated out by using a rotary evaporator, resulting reaction



mixture was diluted with ethyl acetate (200 mL), washed with saturated aqueous NH<sub>4</sub>Cl solution (2×50 mL) followed by water (2×50 mL) and brine. The resulting solution was dried over anhydrous Na<sub>2</sub>SO<sub>4</sub>. After the removal of the solvent under reduced pressure, the residue was purified by column chromatography on silica gel with 40% ethyl acetate- hexanes as the eluent to give compound **8bb** as a gummy liquid (2.5 g, 96%). *R<sub>f</sub>* = 0.3 (Hexanes/EtOAc, 3:2); <sup>1</sup>H NMR (400 MHz, DMSO-*d*<sub>6</sub>) δ 7.92 (d, *J* = 0.9 Hz, 1H), 7.45 (s, 1H), 6.63 (d, *J* = 1.0 Hz, 1H), 4.43 (t, *J* = 5.2 Hz, 1H), 3.42 (dd, *J* = 6.4 Hz, 2H), 2.77 (t, *J* = 7.5 Hz, 2H), 2.33 (s, 3H), 1.71 (p, *J* = 7.4 Hz, 2H), 1.48 (p, *J* = 6.4 Hz, 2H). <sup>13</sup>C NMR (100 MHz, DMSO-*d*<sub>6</sub>) δ 168.8, 161.8, 151.8, 143.2, 129.0, 114.8, 114.7, 110.1, 102.3, 60.3, 31.8, 27.5, 23.6, 20.6. HRMS(ESI-TOF) *m/z* [M+Na]<sup>+</sup> calcd for C<sub>14</sub>H<sub>15</sub><sup>79</sup>BrNaO<sub>4</sub>Si<sup>+</sup>/ C<sub>14</sub>H<sub>15</sub><sup>81</sup>BrNaO<sub>4</sub>Si<sup>+</sup> 349.0046, and 351.0025; found 349.0049, and 351.0028 respectively.

### Synthesis of 4-(6-bromo-5-isopropoxybenzofuran-2-yl)butan-1-ol (**9**)

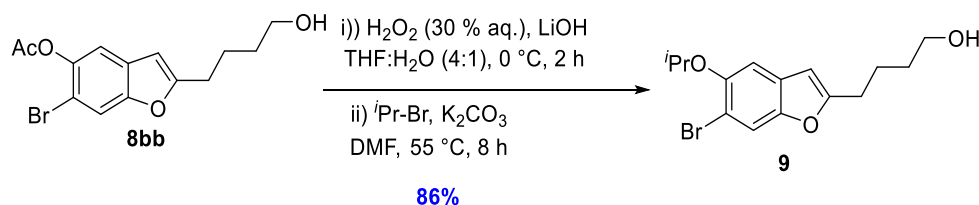

To a stirred solution of **8bb** (2.5 g, 7.65 mmol, 1.0 equiv.) in 40 mL of 4:1 THF-H<sub>2</sub>O at 0 °C was added 8.7 mL (76.5 mmol) of 30% aqueous hydrogen peroxide followed by 459 mg (19.13 mmol) of lithium hydroxide in one portion. After stirring for 2 h at 0 °C, a solution of 9.65 g (76.5 mmol) of sodium sulphite in 20 mL of H<sub>2</sub>O was added to quench excess hydrogen peroxide. The THF was removed *in vacuo*, and the resulting solution was extracted with CH<sub>2</sub>Cl<sub>2</sub> (3×100 mL). The combined CH<sub>2</sub>Cl<sub>2</sub> extract was dried over Na<sub>2</sub>SO<sub>4</sub> and evaporated *in vacuo* to give a white solid. The crude product was pure enough to carry out the next stage.

A solution of the above crude product in DMF (40 mL) was treated K<sub>2</sub>CO<sub>3</sub> (1.27 g, 9.18 mmol) at room temperature and stirred for 15 min. To this 2-bromopropane (1.5 mL, 15.3 mmol) was added and stirred at 55 °C for 8 h. After completion of reaction as indicated by TLC, the reaction was quenched with water and extracted using diethyl ether (3×100 mL). The combined organic layer was washed with brine, dried over Na<sub>2</sub>SO<sub>4</sub>, and concentrated under reduced pressure. The residue was purified by silica gel column chromatography (30% ethyl acetate in petroleum ether) to afford **9** (2.2 g, 86% for two-steps) as a colourless oil. *R<sub>f</sub>* = 0.2 (hexanes/EtOAc, 7:3); <sup>1</sup>H NMR (400 MHz, Chloroform-*d*) δ 7.58 (d, *J* = 0.9 Hz, 1H), 7.02

(s, 1H), 6.29 (d,  $J = 1.0$  Hz, 1H), 4.47 (hept,  $J = 6.1$  Hz, 1H), 3.67 (t,  $J = 6.5$  Hz, 2H), 2.75 (t,  $J = 7.4$  Hz, 2H), 1.80 (p,  $J = 7.7$  Hz, 2H), 1.64 (p,  $J = 8.5$  Hz, 2H), 1.38 (d,  $J = 6.1$  Hz, 6H);  $^{13}\text{C}$  NMR (100 MHz, Chloroform-*d*)  $\delta$  160.5, 150.3, 149.7, 128.7, 115.1, 109.9, 107.9, 102.0, 73.5, 62.4, 32.0, 28.2, 23.8, 22.0; IR ( $\text{cm}^{-1}$ ) 3365, 2976, 2938, 2869, 1612, 1600, 1454, 1236, 1185, 1109, 1000. HRMS(ESI-TOF)  $m/z$   $[\text{M}+\text{Na}]^+$  calcd for  $\text{C}_{15}\text{H}_{19}^{79}\text{BrNaO}_3^+$ / $\text{C}_{15}\text{H}_{19}^{81}\text{BrNaO}_3^+$  349.0410, and 351.0389; found 349.0411, and 351.0393 respectively.

### Synthesis of 4-(6-bromo-5-isopropoxybenzofuran-2-yl)butanoic acid (**10**)

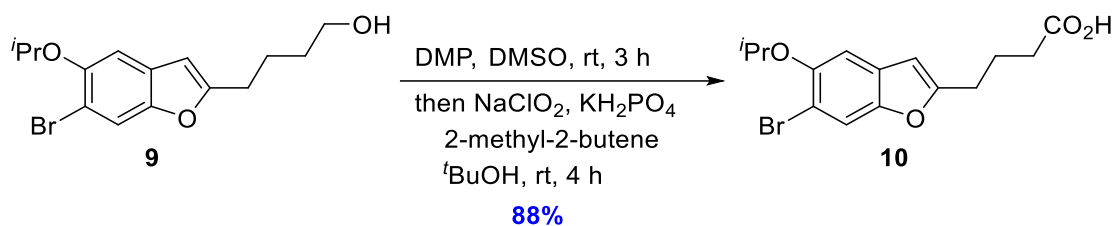

To a stirred solution of **9** (2.15 g, 6.58 mmol) in DMSO (7 mL) at rt, Dess-Martin periodinane (DMP; 4.18 g, 9.86 mmol) was added. The combined reaction mixture stirred for 3 h. After full consumption of starting material, it was diluted with diethyl ether (200 mL). The organic layer was washed with saturated aqueous  $\text{Na}_2\text{S}_2\text{O}_3$  solution, then successively with saturated bicarbonate solution and water. The combined aqueous part again extracted with diethyl ether (2 $\times$ 50 mL). Then combined ether solution was washed with brine, dried over  $\text{Na}_2\text{SO}_4$  and concentrated under reduced pressure. The crude residue was used for further oxidation reaction. A freshly prepared solution of  $\text{NaClO}_2$  (1.19 g, 13.16 mmol) and  $\text{KH}_2\text{PO}_4$  (1.79 g, 13.16 mmol) in  $\text{H}_2\text{O}$  (4 mL) was added to a stirred solution of crude product obtained above and 2-methyl-2-butene (2.78 mL, 26.32 mmol) in  $t\text{BuOH}$  (7 mL) and the mixture was stirred vigorously at room temperature for 4 h. The mixture was extracted with ethyl acetate (3 $\times$ 50 mL). The combined organic layer was dried over anhydrous  $\text{Na}_2\text{SO}_4$ , filtered, and concentrated under reduced pressure. The residue was purified by column chromatography (silica gel 230-400 mesh, ethyl acetate/ petroleum ether 1/2 to 1/1) to afford **10** (1.97 g, 88%) as a white solid. **MP**: 92 - 94  $^\circ\text{C}$ ;  $^1\text{H}$  NMR (400 MHz, Chloroform-*d*)  $\delta$  7.60 (d,  $J = 1.0$  Hz, 1H), 7.03 (s, 1H), 6.33 (d,  $J = 1.1$  Hz, 1H), 4.48 (hept,  $J = 6.1$  Hz, 1H), 2.80 (t,  $J = 7.3$  Hz, 2H), 2.45 (t,  $J = 7.3$  Hz, 2H), 2.06 (p,  $J = 7.3$  Hz, 2H), 1.39 (s, 3H), 1.37 (s, 3H);  $^{13}\text{C}$  NMR (100 MHz, Chloroform-*d*)  $\delta$  179.4, 159.2, 150.4, 149.8, 128.6, 115.2, 110.2, 107.9, 102.7, 73.5, 33.0, 27.6, 22.5, 22.0; IR ( $\text{cm}^{-1}$ ) 2976, 2926, 2856, 1710, 1611, 1455, 1424, 1308, 1235, 1185, 1112, 1001.

**Synthesis of (R)-4-benzyl-3-(4-(6-bromo-5-isopropoxybenzofuran-2-yl)butanoyl)oxazolidin-2-one (3b)**

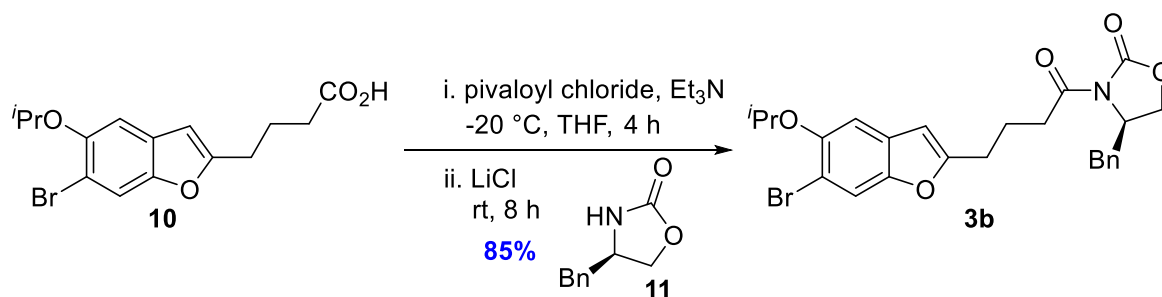

To a stirred solution of **10** (1.81 g, 5.32 mmol) in dry THF (6 mL) was added pivaloyl chloride (0.66 mL, 5.32 mmol, 1 equiv.) and Et<sub>3</sub>N (2.3 mL, 15.96 mmol) at -20 °C and the mixture was stirred at the same temperature for 4 h. To this stirred suspension, chiral oxazolidinone **11** (1.04 g, 5.85 mmol) in dry THF (6 mL) was added dropwise followed by the addition of LiCl (23 mg, 5.32 mmol, 1 equiv.) after which it was stirred for an additional 15 min at -20 °C. The temperature was raised to at 25 °C and stirring continued for 8 h until the complete consumption of the starting materials (the progress of the reaction was monitored by TLC).

The product was then extracted with diethyl ether and the combined organic layer was washed with water, brine, and dried over anhydrous Na<sub>2</sub>SO<sub>4</sub>. Removal of the solvent under reduced pressure gave the crude product, which upon column chromatographic purification with petroleum ether/ ethyl acetate gave the desired product **3b** as a brownish oil (2.26 g, 4.52 mmol, 85%).  $R_f = 0.3$  (EA/PE = 1:4);  $[\alpha]_D^{25}$ : -32.67 (c = 0.9, CHCl<sub>3</sub>) **<sup>1</sup>H NMR (400 MHz, Chloroform-*d*)**  $\delta$  7.60 (s, 1H), 7.35 – 7.23 (m, 3H), 7.18 (d,  $J = 7.0$  Hz, 2H), 7.02 (s, 1H), 6.35 (s, 1H), 4.66 – 4.61 (m, 1H), 4.46 (hept,  $J = 6.0$  Hz, 1H), 4.19 – 4.15 (m, 2H), 3.26 (dd,  $J = 13.4, 3.4$  Hz, 1H), 3.10 – 2.96 (m, 2H), 2.84 (t,  $J = 7.4$  Hz, 2H), 2.74 (dd,  $J = 13.4, 9.6$  Hz, 1H), 2.13 (p,  $J = 7.2$  Hz, 2H), 1.38 (s, 3H), 1.36 (s, 3H); **<sup>13</sup>C NMR (100 MHz, Chloroform-*d*)**  $\delta$  172.5, 159.5, 153.4, 150.4, 149.8, 135.1, 129.3, 128.9, 127.3, 115.2, 110.1, 107.8, 102.5, 73.4, 66.2, 55.1, 37.8, 34.7, 27.7, 22.0, 22.0; **IR (cm<sup>-1</sup>)** 3540, 2979, 2925, 1781, 1698, 1453, 1385, 1185, 1108; **HRMS(ESI-TOF) m/z** [M+Na]<sup>+</sup> calcd for C<sub>25</sub>H<sub>26</sub><sup>79</sup>BrNNaO<sub>5</sub><sup>+</sup>/C<sub>25</sub>H<sub>26</sub><sup>81</sup>BrNNaO<sub>5</sub><sup>+</sup> 522.0887 and 524.0866; found 522.0888 and 524.0871 respectively.

**(R)-4-benzyl-3-((R)-4-(6-bromo-5-isopropoxybenzofuran-2-yl)-2-((R)-hydroxy(4-isopropoxy-3-methoxyphenyl)methyl)butanoyl)oxazolidin-2-one (12)**

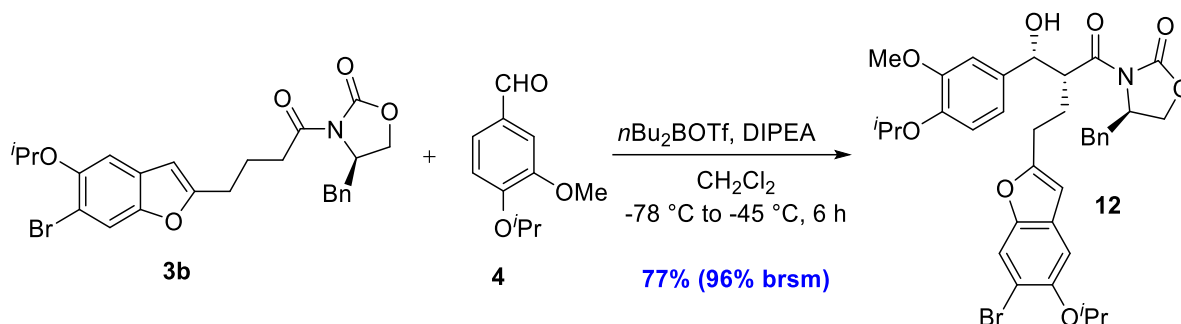

To a solution of compound **3b** (2.26 g, 4.52 mmol) in dry CH<sub>2</sub>Cl<sub>2</sub> (25 mL) cooled at -78 °C was added a solution of *n*Bu<sub>2</sub>BOTf (5.42 mL, 5.42 mmol) dropwise over 10 min. The resulting solution was allowed to stir at -78 °C for 30 min, and then *i*-Pr<sub>2</sub>NEt (1.02 mL, 5.88 mmol) was slowly added. After stirring at -78 °C for 45 min, a solution of 4-isopropoxy-3-methoxybenzaldehyde **4** (2.63 g, 13.56 mmol) in dry CH<sub>2</sub>Cl<sub>2</sub> (20 mL) was added dropwise over 10 min, then the resulting reaction mixture was allowed to stir at -45 °C for additional 6 h and quenched with saturated NH<sub>4</sub>Cl solution. The cooling bath is replaced by an ice bath, stirred for 15 min, and then diluted with CH<sub>2</sub>Cl<sub>2</sub> (200 mL) and H<sub>2</sub>O (30 mL) added to it. The aqueous part was extracted with CH<sub>2</sub>Cl<sub>2</sub> (2×50 mL). The combined organic layer was washed with brine and dried over anhydrous Na<sub>2</sub>SO<sub>4</sub>, filtered, and concentrated under reduced pressure. The residue was purified by column chromatography (silica gel 230-400 mesh, ethyl acetate/petroleum ether 1/9 → 1/2) to afford **12** as a gummy liquid (2.42 g, 77% isolated, 96% brsm, dr > 25:1 syn:anti). *R<sub>f</sub>* = 0.2 (EA/PE = 1:2); [ $\alpha$ ]<sub>D</sub><sup>25</sup>: +48.49 (c = 1.46, CHCl<sub>3</sub>); <sup>1</sup>H NMR (400 MHz, Chloroform-*d*) δ 7.57 (s, 1H), 7.31 – 7.22 (m, 4H), 7.11 (d, *J* = 6.8 Hz, 2H), 6.99 (s, 1H), 6.95 (d, *J* = 1.2 Hz, 1H), 6.85 (dd, *J* = 1.6 Hz, 8.3 Hz, 1H), 6.81 (d, *J* = 8.2 Hz, 1H), 6.27 (s, 1H), 4.86 (d, *J* = 6.4 Hz, 1H), 4.53 – 4.47 (m, 1H), 4.45 – 4.37 (m, 2H), 4.30 – 4.26 (m, 1H), 3.97 (dd, *J* = 1.9, 9.0 Hz, 1H), 3.83 (s, 3H), 3.72 (t, *J* = 8.3 Hz, 1H), 3.05 (dd, *J* = 3.1, 13.2 Hz, 1H), 2.76 (t, *J* = 7.6 Hz, 2H), 2.51 – 2.44 (m, 2H), 2.42 – 2.35 (m, 1H), 2.29 – 2.021 (m, 1H), 1.34 (t, *J* = 6.4 Hz, 12H); <sup>13</sup>C NMR (100 MHz, Chloroform-*d*) δ 174.2, 159.6, 153.0, 150.4, 150.2, 149.7, 146.8, 135.0, 134.2, 129.2, 128.9, 128.6, 127.3, 118.4, 115.2, 110.0, 109.7, 107.7, 102.4, 75.1, 73.4, 71.4, 66.0, 55.8, 55.7, 50.0, 37.8, 26.6, 25.8, 22.0, 22.0, 21.9; IR (cm<sup>-1</sup>) 3496, 2976, 2926, 1778, 1690, 1605, 1454, 1386, 1264, 1232, 1185, 1138, 1109, 1033; HRMS(ESI-TOF) *m/z* [M+Na]<sup>+</sup> calcd for C<sub>36</sub>H<sub>40</sub><sup>79</sup>BrNNaO<sub>8</sub><sup>+</sup>/ C<sub>36</sub>H<sub>40</sub><sup>81</sup>BrNNaO<sub>8</sub><sup>+</sup> 716.1830 and 718.1809; found 716.1822 and 718.1810 respectively.

## Synthesis of 4-isopropoxy-3-methoxybenzaldehyde (**4**)

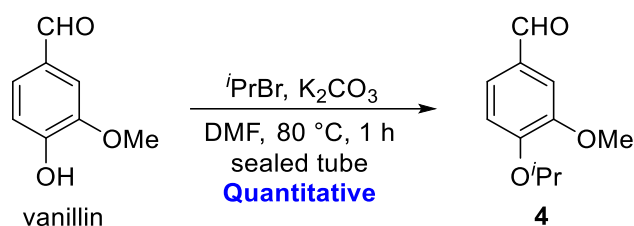

To a solution of vanillin (10 g, 65.72 mmol) in dry DMF were added successively 2-bromo propane (6.8 mL, 72.30 mmol) and potassium carbonate (13.6 g, 98.58 mmol) at rt. The mixture was then heated at 80 °C in a sealed tube for 1 h. After consumption of the vanillin, reaction mixture was diluted with diethyl ether followed by filtered through a pad of celite. The solution was washed with H<sub>2</sub>O, brine, dried over anhydrous Na<sub>2</sub>SO<sub>4</sub>, and concentrated under reduced pressure. The pure compound was obtained by chromatography on silica gel (hexanes/EtOAc, 5:1) to afford **4** as a colourless viscous liquid in quantitative yield (12.5 g).  $R_f = 0.4$  (hexanes/EtOAc, 4:1); <sup>1</sup>H NMR (400 MHz, Chloroform-*d*) δ 9.83 (s, 1H), 7.42 (dd, *J* = 10.0, 1.8 Hz, 2H), 6.97 (d, *J* = 8.1 Hz, 1H), 4.68 (hept, *J* = 6.1 Hz, 1H), 3.91 (s, 3H), 1.43 (s, 3H), 1.41 (s, 3H); <sup>13</sup>C NMR (100 MHz, Chloroform-*d*) δ 190.9, 153.1, 150.3, 129.7, 126.6, 112.8, 109.5, 71.3, 56.0, 21.8; IR (cm<sup>-1</sup>) 2979, 2935, 1685, 1591, 1506, 1466, 1425, 1267, 1132, 1030; HRMS(ESI-TOF) *m/z* [M+Na]<sup>+</sup> calcd for C<sub>11</sub>H<sub>14</sub>NaO<sub>3</sub><sup>+</sup> 217.0835, found: 217.0844.

## Synthesis of (*R*)-4-benzyl-3-((1*R*,2*R*)-7-bromo-8-isopropoxy-1-(4-isopropoxy-3-methoxyphenyl)-1,2,3,4-tetrahydrodibenzo[*b,d*]furan-2-carbonyl)oxazolidin-2-one (**13**)

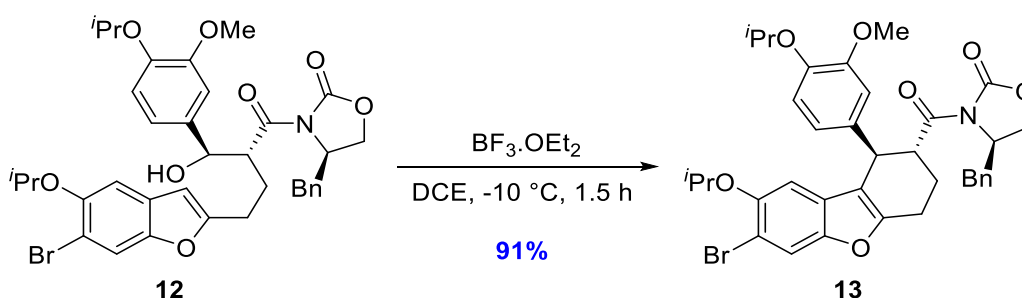

To a stirred solution of aldol product **12** (2.42 g, 3.48 mmol) in 1,2-dichloroethane (DCE) (18 mL) at -10 °C freshly distilled BF<sub>3</sub>·OEt<sub>2</sub> (0.86 mL, 6.96 mmol) was added dropwise. The reaction mixture was allowed to stir at the same temperature for 1.5 h. After completion of reaction as indicated by TLC, the reaction was quenched with saturated bicarbonate solution and diluted with ethyl acetate (300 mL). The organic layer was washed with H<sub>2</sub>O, brine, dried

over Na<sub>2</sub>SO<sub>4</sub>, and concentrated under reduced pressure. The residue was purified by silica gel column chromatography (15% ethyl acetate in petroleum ether) to afford **13** (2.15 g, 91%) as a gummy colourless liquid.  $R_f = 0.4$  (EA/PE = 1:4);  $[\alpha]_D^{25} : +30.9$  (c = 1, CHCl<sub>3</sub>); **<sup>1</sup>H NMR (400 MHz, Chloroform-*d*)**  $\delta$  7.55 (s, 1H), 7.33 – 7.24 (m, 3H), 7.18 (d, *J* = 7.0 Hz, 2H), 6.80 – 6.77 (m, 2H), 6.74 (s, 1H), 5.97 (s, 1H), 4.49 – 4.43 (m, 2H), 4.39 (d, *J* = 9.8 Hz, 1H), 4.23 (td, *J* = 2.0, 11.6 Hz, 1H), 4.07 – 3.99 (m, 2H), 3.89 (t, *J* = 8.2 Hz, 1H), 3.72 (s, 3H), 3.22 (dd, *J* = 3.4, 13.4 Hz, 1H), 3.14 – 3.03 (m, 1H), 2.90 (dd, *J* = 5.3, 17.2 Hz, 1H), 2.77 (dd, *J* = 9.5, 13.3 Hz, 1H), 2.41 – 2.36 (m, 1H), 2.15 (qd, *J* = 5.8, 11.9 Hz, 1H), 1.32 (dd, *J* = 1.8, 6.1 Hz, 6H), 1.18 (d, *J* = 6.1 Hz, 3H), 1.09 (d, *J* = 6.0 Hz, 3H); **<sup>13</sup>C NMR (100 MHz, Chloroform-*d*)**  $\delta$  174.2, 154.2, 152.9, 150.2, 149.7, 149.5, 146.3, 135.0, 133.6, 129.4, 128.9, 127.5, 127.3, 121.1, 115.4, 115.1, 114.8, 112.3, 109.4, 106.9, 72.7, 71.3, 66.0, 56.0, 55.2, 47.2, 42.3, 37.8, 26.5, 23.1, 22.0, 21.9, 21.8, 21.5; **IR (cm<sup>-1</sup>)** 2977, 2935, 1781, 1698, 1511, 1457, 1386, 1261, 1229, 1139, 1112; **HRMS(ESI-TOF) m/z** [M+Na]<sup>+</sup> calcd for C<sub>36</sub>H<sub>38</sub><sup>79</sup>BrNNaO<sub>7</sub><sup>+</sup>/C<sub>36</sub>H<sub>38</sub><sup>81</sup>BrNNaO<sub>7</sub><sup>+</sup> 698.1724 and 700.1703; found 698.1726 and 700.1708 respectively.

### Synthesis of ((1*R*,2*R*)-7-bromo-8-isopropoxy-1-(4-isopropoxy-3-methoxyphenyl)-1,2,3,4-tetrahydrodibenzo[*b,d*]furan-2-yl)methyl acetate (**2**)

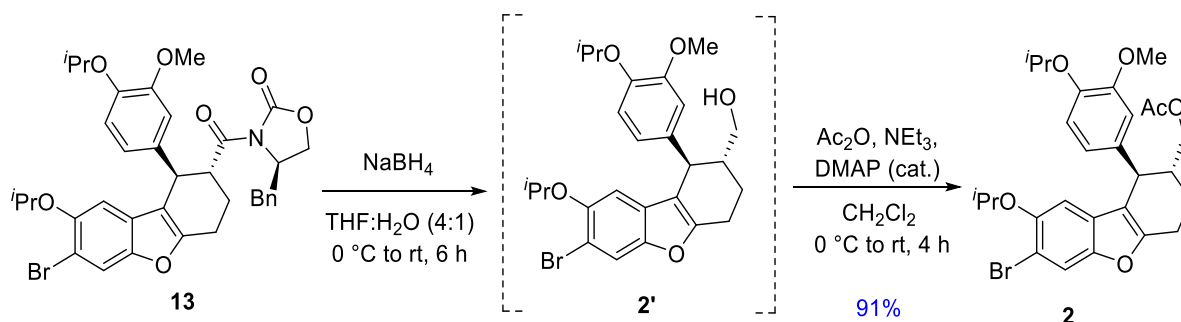

To a cooled (0 °C) solution of imide **13** (2.15 g, 3.10 mmol) in 15 ml THF: H<sub>2</sub>O (4:1) was added NaBH<sub>4</sub> (470 mg, 12.40 mmol) in one portion. The mixture was stirred at rt for 6 h. The reaction was quenched by the addition of 30 mL saturated aqueous NH<sub>4</sub>Cl and the mixture was extracted with EtOAc (3×100 mL). The combined organic extracts were dried over Na<sub>2</sub>SO<sub>4</sub> and concentrated under reduced pressure to afford alcohol **2'** as a colourless viscous liquid, which was found to be sufficiently pure to move for the next step.

To a solution of crude **2'** (3.17 mmol) and DMAP (39 mg, 0.317 mmol) in CH<sub>2</sub>Cl<sub>2</sub> (32 mL) at 0 °C was treated triethylamine (0.66 mL, 4.76 mmol) followed by Ac<sub>2</sub>O (0.33 mL, 3.49 mmol).

The reaction mixture was warmed to room temperature and stirred for 4 h. After completion of the reaction as indicated by TLC, it was quenched by adding saturated  $\text{NH}_4\text{Cl}$ . The reaction mixture was diluted with  $\text{CH}_2\text{Cl}_2$  (200 mL). The organic layer was washed with  $\text{H}_2\text{O}$  (2×50 mL), brine, dried over anhydrous  $\text{Na}_2\text{SO}_4$ , and concentrated under reduced pressure. The residue was purified by column chromatography (15% ethyl acetate in petroleum ether) to afford **2** (1.54 g, 91%) as a colourless viscous liquid.  $R_f = 0.25$  (EA/PE = 1:4)  $[\alpha]_D^{25}$ : +29.66 ( $c = 0.87$ ,  $\text{CHCl}_3$ );  **$^1\text{H}$  NMR (400 MHz, Chloroform-*d*)**  $\delta$  7.54 (s, 1H), 6.82 (d,  $J = 8.1$  Hz, 1H), 6.69 (dd,  $J = 2.0, 8.2$  Hz, 1H), 6.65 (d,  $J = 2.1$  Hz, 1H), 6.03 (s, 1H), 4.47 (hept,  $J = 6.1$  Hz, 1H), 4.11 (dd,  $J = 4.1, 11.1$  Hz, 1H), 4.08 – 4.00 (m, 2H), 3.76 (d,  $J = 2.5$  Hz, 1H), 3.73 (s, 3H), 2.94 – 2.81 (m, 2H), 2.24 – 2.11 (m, 2H), 2.04 (s, 3H) 1.89 – 1.79 (m, 1H), 1.34 (dd,  $J = 2.0, 6.1$  Hz, 6H), 1.19 (d,  $J = 6.1$  Hz, 3H), 1.11 (d,  $J = 6.0$  Hz, 3H);  **$^{13}\text{C}$  NMR (100 MHz, Chloroform-*d*)**  $\delta$  171.1, 155.0, 150.5, 149.8, 149.5, 146.3, 134.5, 127.8, 120.9, 115.6, 115.1, 115.0, 112.2, 109.3, 106.9, 72.7, 71.4, 66.0, 56.1, 42.2, 42.0, 25.5, 22.7, 22.0, 22.0, 21.9, 21.6, 20.8; **IR ( $\text{cm}^{-1}$ )** 2976, 2929, 1740, 1512, 1454, 1230, 1141, 1109, 1036; **HRMS(ESI-TOF)  $m/z$   $[\text{M}+\text{Na}]^+$**  calcd for  $\text{C}_{28}\text{H}_{33}^{79}\text{BrNaO}_6^+$  /  $\text{C}_{28}\text{H}_{33}^{81}\text{BrNaO}_6^+$  567.1353 and 569.1332; found 567.1342 and 569.1332 respectively.

### Friedel-Crafts cyclization of **12'** after reductive removal of chiral auxiliary **12**

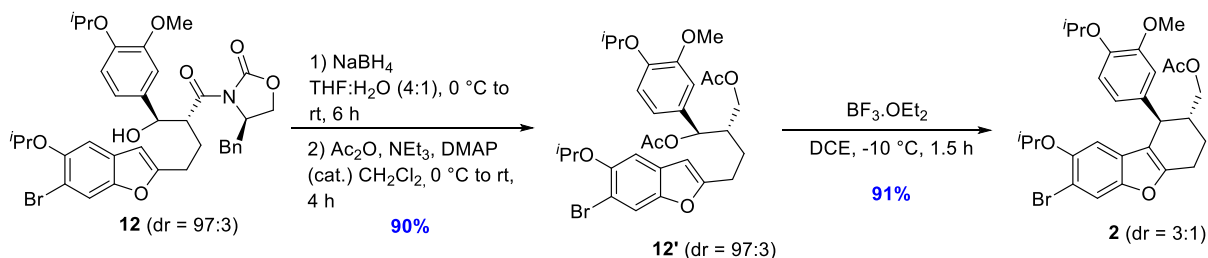

To a cooled ( $0\text{ }^\circ\text{C}$ ) solution of imide **12** (0.100 g, 0.14 mmol) in 2 ml  $\text{THF}:\text{H}_2\text{O}$  (4:1) was added  $\text{NaBH}_4$  (21 mg, 0.56 mmol) in one portion. The mixture was stirred at rt for 6 h. The reaction was quenched by the addition of 5 mL saturated aqueous  $\text{NH}_4\text{Cl}$  and the mixture was extracted with  $\text{EtOAc}$  (3×100 mL). The combined organic extracts were dried over  $\text{Na}_2\text{SO}_4$  and concentrated under reduced pressure to afford alcohol as a colourless viscous liquid, which was found to be sufficiently pure to move for the next step.

To a solution of alcohol product and DMAP (2 mg, 0.014 mmol) in  $\text{CH}_2\text{Cl}_2$  (2 mL) at  $0\text{ }^\circ\text{C}$  was treated triethylamine (0.06 mL, 0.42 mmol) followed by  $\text{Ac}_2\text{O}$  (0.04 mL, 0.35 mmol). The reaction mixture was warmed to room temperature and stirred for 4 h. After completion of the

reaction as indicated by TLC, it was quenched by adding saturated  $\text{NH}_4\text{Cl}$ . The reaction mixture was diluted with  $\text{CH}_2\text{Cl}_2$  (20 mL). The organic layer was washed with  $\text{H}_2\text{O}$  ( $2 \times 5$  mL), brine, dried over anhydrous  $\text{Na}_2\text{SO}_4$ , and concentrated under reduced pressure. The residue was purified by column chromatography (20% ethyl acetate in petroleum ether) to afford **12'** (78 mg, 90%) without affecting the dr as a colourless viscous liquid.  $R_f = 0.30$  (EA/PE = 1:4)  $^1\text{H}$  NMR (400 MHz, Chloroform-*d*)  $\delta$  7.58 (s, 1H), 7.01 (s, 1H), 6.83 (d,  $J = 8.2$  Hz, 1H), 6.78 (dd,  $J = 1.72, 8.4$  Hz, 1H), 6.75 (d,  $J = 1.56$  Hz), 6.22 (s, 1H), 5.81 (d,  $J = 6.9$  Hz, 1H), 4.55 – 4.43 (m, 2H), 4.23 – 4.12 (m, 2H), 3.87 – 3.82 (m, 1H), 3.81 (s, 3H), 2.84 – 2.77 (m, 1H), 2.73 – 2.65 (m, 1H), 2.22 – 2.14 (m, 1H), 2.11 (s, 3H), 2.04 (s, 3H), 2.0 – 1.93 (m, 1H), 1.83 – 1.71 (m, 1H), 1.37 (dd,  $J = 9.3, 6.1$  Hz, 12H);  $^{13}\text{C}$  NMR (100 MHz, Chloroform-*d*)  $\delta$  170.9, 170.1, 159.7, 150.4, 150.2, 149.7, 147.1, 131.1, 128.6, 118.9, 115.2, 115.0, 110.3, 110.1, 107.8, 102.3, 75.5, 73.5, 71.3, 63.3, 56.0, 42.4, 26.1, 25.0, 22.1, 22.1, 21.2, 20.9; HRMS(ESI-TOF)  $m/z$   $[\text{M}+\text{Na}]^+$  calcd for  $\text{C}_{30}\text{H}_{37}^{79}\text{BrNaO}_8^+$  /  $\text{C}_{30}\text{H}_{37}^{81}\text{BrNaO}_8^+$  627.1564 and 629.1544; found 627.1559 and 629.1545 respectively.

To a stirred solution of aldol product **12'** (78 mg, 0.13 mmol) in 1,2-dichloroethane (DCE) (3 mL) at  $-10$  °C freshly distilled  $\text{BF}_3 \cdot \text{OEt}_2$  (0.03 mL, 0.26 mmol) was added dropwise. The reaction mixture was allowed to stir at the same temperature for 1.5 h. After completion of reaction as indicated by TLC, the reaction was quenched with saturated bicarbonate solution and diluted with ethyl acetate (30 mL). The organic layer was washed with  $\text{H}_2\text{O}$ , brine, dried over  $\text{Na}_2\text{SO}_4$ , and concentrated under reduced pressure. The residue was purified by silica gel column chromatography (15% ethyl acetate in petroleum ether) to afford **2** (64 mg, 91%) as a gummy colourless liquid with dr of 3:1.

**Table SI4. Screening of reaction conditions for the direct acetylation of bromo-compound 2/2'**

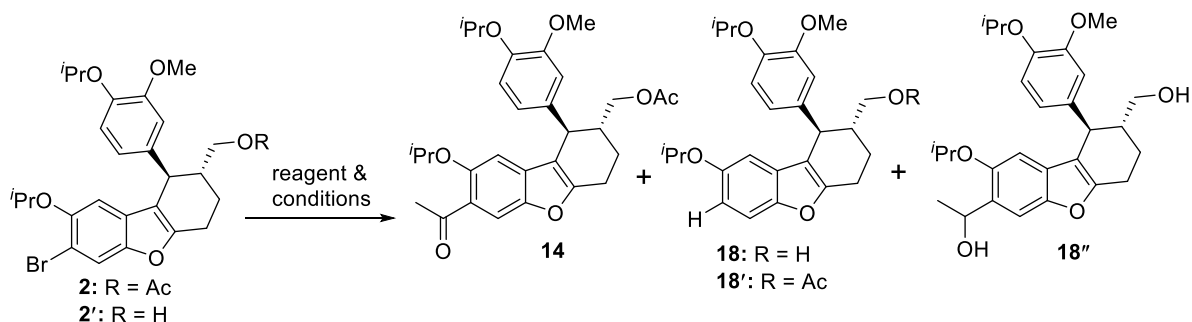



| entry    | substrate | acetyl source                                                                       | Reagent and reaction condition                                                                                              | Product/s                        | Yield (%) |
|----------|-----------|-------------------------------------------------------------------------------------|-----------------------------------------------------------------------------------------------------------------------------|----------------------------------|-----------|
| 1        | 2         | AcTMS (2 equiv.)                                                                    | Pd(PPh <sub>3</sub> ) <sub>4</sub> (5 mol%), CsF (4 equiv.), DMF (1 M), 80 °C, 24 h                                         | <b>18'</b>                       | Traces    |
| 2        | 2         | AcTMS (2 equiv.)                                                                    | Pd(PPh <sub>3</sub> ) <sub>4</sub> (5 mol%), CsF (4 equiv.), DCE (1 M), 75 °C, 24 h                                         | <b>18'</b>                       | Traces    |
| 3        | 2         | AcTMS (2 equiv.)                                                                    | Pd <sub>2</sub> (dba) <sub>3</sub> (5 mol%), P( <i>o</i> -tolyl) <sub>3</sub> , CsF (4 equiv.), DCE (1 M), 75 °C, 24 h      | NDP                              | --        |
| 4        | 2'        | Ac <sub>2</sub> O                                                                   | <i>n</i> -BuLi, THF, -78 °C to rt, 24 h                                                                                     | <b>18'</b>                       | 91        |
| 5        | 2'        | CH <sub>3</sub> CHO                                                                 | <i>n</i> -BuLi, THF, -78 °C to rt, 24 h                                                                                     | <b>18</b><br>( <b>18'</b> trace) | 86        |
| 6        | 2'        | CH <sub>3</sub> CON(OMe)Me                                                          | <i>n</i> -BuLi, THF, -78 °C to rt, 24 h                                                                                     | 18                               | 90        |
| 7        | 2'        | Ac <sub>2</sub> O                                                                   | <i>i</i> PrMgCl.2LiCl, THF, -10 °C to rt, 24 h                                                                              | NR                               | --        |
| 8        | 2'        | CH <sub>3</sub> CON(OMe)Me                                                          | <i>i</i> PrMgCl.2LiCl, THF, -10 °C to rt, 24 h                                                                              | NR                               | --        |
| <b>9</b> | <b>2</b>  | 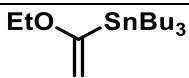 | <b>Pd(PPh<sub>3</sub>)<sub>4</sub> (10 mol%),<br/>LiCl (2 equiv.), DMF (0.1 M), 80 °C, 12 h<br/>then 1 N HCl, pH= 1, rt</b> | <b>14</b>                        | <b>84</b> |

NDP: No desired product; NR: No reaction

**Synthesis of ((1*R*,2*R*)-7-acetyl-8-isopropoxy-1-(4-isopropoxy-3-methoxyphenyl)-1,2,3,4-tetrahydrodibenzo[*b,d*]furan-2-yl)methyl acetate (14)**

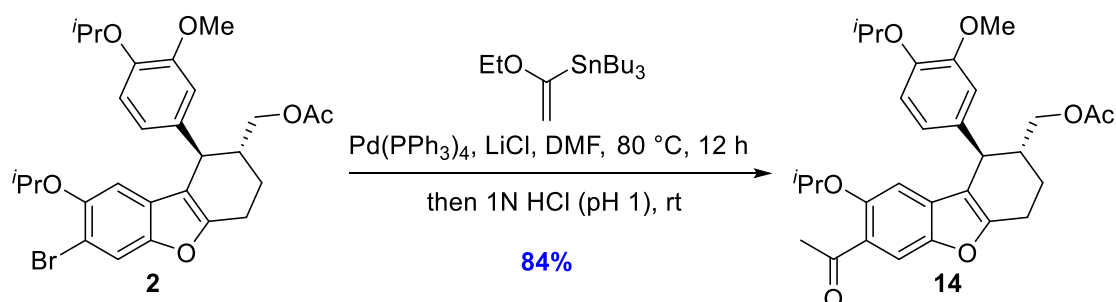

Compound **2** (500 mg, 0.92 mmol) was taken in a two-neck RB flask in dry DMF (10 mL), and argon was flushed 10 times. Pd(PPh<sub>3</sub>)<sub>4</sub> (106 mg, 0.092 mmol), LiCl (78 mg, 1.84 mmol), and tributyl(1-ethoxyvinyl)tin (0.62 mL, 1.84 mmol) were successively added to the reaction mixture. The reaction flask was again flushed with argon 6 times and heated to 80 °C in a preheated oil bath and continued for 12 h. After cooling to rt, the reaction mixture was acidified with 1M HCl to pH= 1. The mixture was diluted with diethyl ether (200 mL) and filtered through a short pad of celite. The residue part was again washed with diethyl ether (2×50 mL). The combined organic layer was successively washed with water (2×30 mL), and brine, dried over anhydrous Na<sub>2</sub>SO<sub>4</sub>, and the solvent was removed under reduced pressure. The crude product was purified by column chromatography (hexanes/ethyl acetate, 4:1) to get the title compound **14** as a colourless viscous liquid (393 mg, 84% over two-step).  $R_f = 0.6$  (EA/PE = 1:1.5)  $[\alpha]_D^{25}$ : +31.04 (c = 2.4, CHCl<sub>3</sub>); **<sup>1</sup>H NMR (800 MHz, Chloroform-*d*)**  $\delta$  7.77 (s, 1H), 6.83 (d, *J* = 8.2 Hz, 1H), 6.72 (dd, *J* = 2.0, 8.2 Hz, 1H), 6.66 (d, *J* = 1.9 Hz, 1H), 5.95 (s, 1H), 4.48 (hept, *J* = 6.1 Hz, 1H), 4.17 – 4.12 (m, 1H), 4.11 (dd, *J* = 11.1, 4.0 Hz, 1H), 4.04 (dd, *J* = 6.9, 11.0 Hz, 1H), 3.76 (d, *J* = 6.8 Hz, 1H), 3.74 (s, 3H), 2.96- 2.92 (m, 1H), 2.90 – 2.87 (m, 1H), 2.57 (s, 3H), 2.24 – 2.21 (m, 1H), 2.19 – 2.14 (m, 1H), 2.04 (s, 3H), 1.88 – 1.82 (m, 1H), 1.35 (dd, *J* = 4.4, 6.1 Hz, 6H), 1.25 (d, *J* = 6.1 Hz, 3H), 1.06 (d, *J* = 6.0 Hz, 3H); **<sup>13</sup>C NMR (200 MHz, Chloroform-*d*)**  $\delta$  199.7, 171.1, 158.0, 153.4, 150.5, 148.9, 146.4, 134.4, 132.6, 124.9, 120.9, 115.5, 115.2, 112.1, 112.0, 103.5, 71.3, 70.6, 66.0, 56.1, 42.1, 42.1, 32.2, 25.6, 23.0, 22.1, 22.0, 22.0, 21.3, 20.9; **IR (cm<sup>-1</sup>)** 2977, 2935, 1740, 1667, 1715, 1510, 1445, 1386, 1249, 1224, 1185, 1141, 1112, 1038; **HRMS(ESI-TOF) m/z** [M+Na]<sup>+</sup> calcd for C<sub>30</sub>H<sub>36</sub>NaO<sub>7</sub><sup>+</sup> 531.2353, found: 531.2365.

**Table S15.** Benzylic oxidation of **2/23**

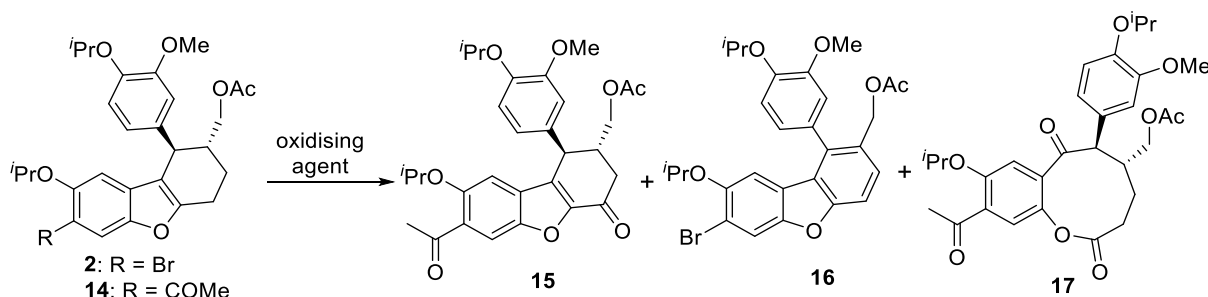

| Entry | 2/14 | Oxidizing agent | Reaction conditions | Product <sup>a</sup> | Yield <sup>b</sup> (%) |
|-------|------|-----------------|---------------------|----------------------|------------------------|
|       |      |                 |                     |                      |                        |

|   |           |                                 |                                          |                    |    |
|---|-----------|---------------------------------|------------------------------------------|--------------------|----|
| 1 | <b>14</b> | IBX                             | Fluorobenzene/DMSO (2:1), 80 °C          | NDP/MRP            | -- |
| 2 | <b>14</b> | NaClO <sub>2</sub> , NHP (cat.) | ACN/H <sub>2</sub> O (2:1), 50 °C        | NDP/MRP            | -- |
| 3 | <b>2</b>  | SeO <sub>2</sub>                | 1,4-dioxane, 110 °C                      | <b>16</b>          | 70 |
| 4 | <b>14</b> | CrO <sub>3</sub> / DMPyr        | CH <sub>2</sub> Cl <sub>2</sub> , rt     | <b>17</b>          | 64 |
| 5 | <b>14</b> | CrO <sub>3</sub> / DMPyr        | CH <sub>2</sub> Cl <sub>2</sub> , 0 °C   | <b>15/17</b> (1:3) | 57 |
| 6 | <b>14</b> | CrO <sub>3</sub> / DMPyr        | CH <sub>2</sub> Cl <sub>2</sub> , -20 °C | <b>15/17</b> (1:1) | 62 |
| 7 | <b>14</b> | CrO <sub>3</sub> / DMPyr        | CH <sub>2</sub> Cl <sub>2</sub> , -40 °C | <b>15/17</b> (3:1) | 61 |
| 8 | <b>14</b> | CrO <sub>3</sub> / DMPyr        | CH <sub>2</sub> Cl <sub>2</sub> , -50 °C | <b>15/17</b> (3:1) | 60 |

<sup>a</sup>The value in the parenthesis referred to the isolated ratio of compounds **15** and **17**. <sup>b</sup> Combined isolated yield. NDP = No desired product; MRP = Messy reaction profile; NHP = *N*-hydroxyphthalimide; DMPyr = 3,5-dimethyl pyrazole; ACN = Acetonitrile.

### Synthesis of (+)-propolisbenzofuran **B** (**1**)

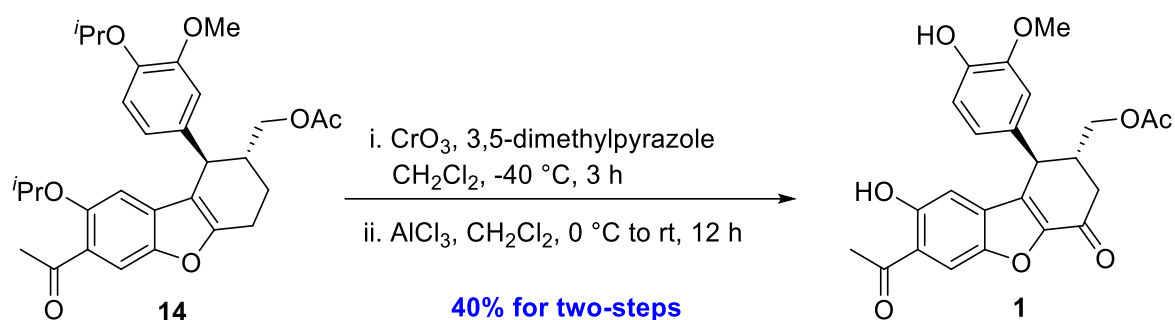

At -40 °C, to a stirred solution of CrO<sub>3</sub> (394 mg, 3.94 mmol) in dry CH<sub>2</sub>Cl<sub>2</sub> (2 mL) and 3,5-dimethylpyrazole (378 mg, 3.94 mmol) was added a solution of **14** (100 mg, 0.197 mmol) in dry CH<sub>2</sub>Cl<sub>2</sub> (2 mL) was added. The reaction mixture was continued at the same temperature for 3 h. The reaction mixture was pass through to a small pad of silica 230-400 mesh. The filtrate part was successively washed with 1N HCl (2×50 mL), water, and brine, concentrated under reduced pressure, and used in the next step without further purification.

At 0 °C, a solution of crude product in CH<sub>2</sub>Cl<sub>2</sub> (4 mL) was treated with AlCl<sub>3</sub> (105 mg, 0.788 mmol) and stirred for 10 min. The reaction mixture was warmed to room temperature and stirred for 12 h. The reaction mixture was quenched with saturated NH<sub>4</sub>Cl and partitioned between water (10 mL) and CH<sub>2</sub>Cl<sub>2</sub> (50 mL). The organic layer was separated and the aqueous layer was extracted using CH<sub>2</sub>Cl<sub>2</sub> (2×20 mL). The combined organic layer was washed using

brine, dried over Na<sub>2</sub>SO<sub>4</sub>, filtered, and concentrated *in vacuo*. The crude residue was purified by column chromatography (30→40% ethyl acetate in petroleum ether) to afford **1** (35 mg, 40% over two-steps) as yellow solid which matched the published spectral data (see Table S11) **R<sub>f</sub>** = 0.5 (EA/PE = 1:1.5); **MP**: 198- 200 °C; [ $\alpha$ ]<sub>D</sub><sup>25</sup>: +36.2 (c = 0.36, CHCl<sub>3</sub>) [lit [ $\alpha$ ]<sub>D</sub><sup>25</sup>: +38.4 (c = 0.08, CHCl<sub>3</sub>)]<sup>2</sup> **<sup>1</sup>H NMR (400 MHz, Chloroform-*d*)**  $\delta$  11.83 (s, 1H), 7.93 (s, 1H), 6.92 (d, *J* = 8.1 Hz, 1H), 6.73 (dd, *J* = 8.1, 2.0 Hz, 1H), 6.63 (d, *J* = 2.0 Hz, 1H), 6.26 (s, 1H), 5.65 (s, 1H), 4.18 (d, *J* = 9.7 Hz, 1H), 4.09 – 3.99 (m, 2H), 3.80 (s, 3H), 2.91 (d, *J* = 12.6 Hz, 1H), 2.82 – 2.74 (m, 2H), 2.69 (s, 3H), 2.08 (s, 3H); **<sup>13</sup>C NMR (100 MHz, Chloroform-*d*)**  $\delta$  204.0, 187.3, 170.6, 157.6, 150.7, 148.9, 147.1, 145.6, 134.3, 133.0, 130.2, 121.6, 120.0, 115.1, 114.0, 110.4, 110.1, 64.6, 56.0, 44.5, 42.6, 41.4, 27.0, 20.8; **<sup>1</sup>H NMR (400 MHz, Acetone-*d*<sub>6</sub>)**  $\delta$  11.81 (s, 1H), 8.23 (s, 1H), 7.68 (s, 1H), 7.04 (d, *J* = 1.7 Hz, 1H), 6.92-6.87 (dd, *J* = 2.1, 8 Hz, 2H), 6.17 (s, 1H), 4.37 (d, *J* = 9.8 Hz, 1H), 4.08 (t, *J* = 4.3 Hz, 2H), 3.78 (s, 3H), 3.02 – 2.93 (m, 1H), 2.89 – 2.84 (m, 2H), 2.77 (s, 4H), 2.07 (s, 3H); **<sup>13</sup>C NMR (100 MHz, Acetone-*d*<sub>6</sub>)**  $\delta$  206.5, 187.7, 171.1, 158.4, 152.0, 149.8, 149.1, 147.4, 135.2, 134.3, 131.8, 122.7, 120.7, 116.3, 115.7, 113.1, 110.2, 65.4, 56.5, 45.1, 43.3, 42.5, 27.5, 20.8; **IR (cm<sup>-1</sup>)** 3428, 2923, 1740, 1681, 1643, 1517, 1433, 1377, 1260, 1033. **HRMS(ESI-TOF) m/z** [M+Na]<sup>+</sup> calcd for C<sub>24</sub>H<sub>22</sub>NaO<sub>8</sub><sup>+</sup> 461.1207; found 461.1209.

**((5*R*,6*R*)-10-acetyl-9-isopropoxy-6-(4-isopropoxy-3-methoxyphenyl)-2,7-dioxo-2,3,4,5,6,7-hexahydrobenzo[*b*]oxonin-5-yl)methyl acetate (**17**)**

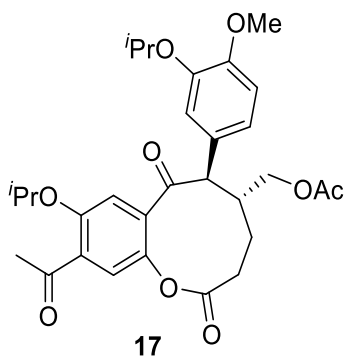

**Physical Appearance:** Yellowish gummy liquid.

**<sup>1</sup>H NMR (400 MHz, Chloroform-*d*)**  $\delta$  7.60 (s, 1H), 6.79 (d, *J* = 2.1 Hz, 1H), 6.74 (d, *J* = 8.2 Hz, 1H), 6.66 (dd, *J* = 8.3, 2.1 Hz, 1H), 6.51 (s, 1H), 4.52 – 4.42 (m, 2H), 4.29 (d, *J* = 11.6 Hz, 1H), 3.92 – 3.84 (m, 2H), 3.81 (s, 3H), 3.00 – 2.93 (m, 1H), 2.76 – 2.63 (m, 2H), 2.59 (s, 3H), 2.40 – 2.31 (m, 1H), 2.17 – 2.10 (m, 1H), 2.01 (s, 3H), 1.34 (d, *J* = 2.7 Hz, 3H), 1.32 (d, *J* = 2.7 Hz, 3H), 1.30 (d, *J* = 6.0 Hz, 3H), 1.24 (d, *J* = 6.0 Hz, 3H); **<sup>13</sup>C NMR (100 MHz,**

**Chloroform-*d***  $\delta$  203.0, 198.4, 174.3, 170.6, 155.1, 150.6, 147.2, 141.9, 138.7, 131.1, 127.4, 124.9, 121.6, 115.2, 112.3, 111.7, 71.4, 71.2, 64.5, 56.9, 56.0, 39.4, 31.9, 30.9, 26.5, 22.0, 22.0, 21.8, 21.7, 20.8;  $[\alpha]_D^{25}$ : +9 ( $c = 1$ ,  $\text{CHCl}_3$ ); **IR** ( $\text{cm}^{-1}$ ) 2977, 2935, 1766, 1740, 1681, 1511, 1477, 1401, 1235, 1176, 1141, 1106, 1036; **HRMS(ESI-TOF)  $m/z$**   $[\text{M}+\text{Na}]^+$  calcd for  $\text{C}_{30}\text{H}_{36}\text{NaO}_9^+$  563.2252; found 563.2255.

**Synthesis of (7-bromo-8-isopropoxy-1-(4-isopropoxy-3-methoxyphenyl)dibenzo[*b,d*]furan-2-yl)methyl acetate (16)**

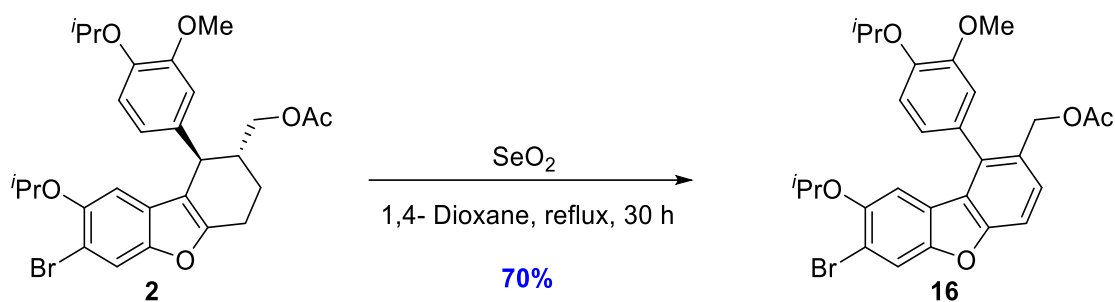

To a stirred solution of **2** (100 mg, 0.184 mmol) in anhydrous 1,4-dioxane (2 mL) was added  $\text{SeO}_2$  (61 mg, 0.552 mmol) and the resulting mixture was heated under reflux for 30 h. After cooling to room temperature, the reaction mixture was diluted with ethyl acetate (20 mL) and washed with water (30 mL). The aqueous layer was extracted with ethyl acetate ( $3 \times 10$  mL). The combined organic layers were washed with brine, dried over  $\text{Na}_2\text{SO}_4$ , filtered, and concentrated *in vacuo*. Purification was done by flash column chromatography (hexanes/ethyl acetate, 9:1) to get the title compound **16** as a white solid (70 mg, 70%).  $R_f = 0.5$  (EA/PE = 1:4); **MP**: 130 – 132 °C;  **$^1\text{H}$  NMR (400 MHz, Chloroform-*d*)**  $\delta$  7.72 (s, 1H), 7.58 (d,  $J = 8.6$  Hz, 1H), 7.52 (d,  $J = 8.5$  Hz, 1H), 7.06 (d,  $J = 7.8$  Hz, 1H), 6.95 – 6.90 (m, 2H), 6.34 (s, 1H), 5.08 (d,  $J = 3.2$  Hz, 2H), 4.65 (hept,  $J = 6.1$  Hz, 1H), 4.08 (p,  $J = 6.1$  Hz, 1H), 3.82 (s, 3H), 2.05 (s, 3H), 1.46 (t,  $J = 6.4$  Hz, 7H), 1.26 (t,  $J = 5.6$  Hz, 6H);  **$^{13}\text{C}$  NMR (100 MHz, Chloroform-*d*)**  $\delta$  170.6, 156.3, 151.0, 150.5, 150.2, 147.2, 137.2, 129.7, 128.9, 128.5, 123.8, 123.3, 121.3, 115.9, 115.4, 113.1, 112.9, 110.8, 108.4, 72.7, 71.5, 64.0, 56.0, 22.3, 21.9, 21.8, 21.7, 21.0; **IR** ( $\text{cm}^{-1}$ ) 2976, 2932, 1740, 1514, 1442, 1384, 1243, 1179, 1138, 1109, 1033; **HRMS(ESI-TOF)  $m/z$**   $[\text{M}+\text{Na}]^+$  calcd for  $\text{C}_{28}\text{H}_{29}^{79}\text{BrNaO}_6^+$  /  $\text{C}_{28}\text{H}_{29}^{81}\text{BrNaO}_6^+$  563.1040 and 565.1019; found 563.1039 and 565.1024 respectively.

**Synthesis of ((1*R*,2*R*)-8-isopropoxy-1-(4-isopropoxy-3-methoxyphenyl)-1,2,3,4-tetrahydrodibenzo[*b,d*]furan-2-yl)methanol (**18**)**

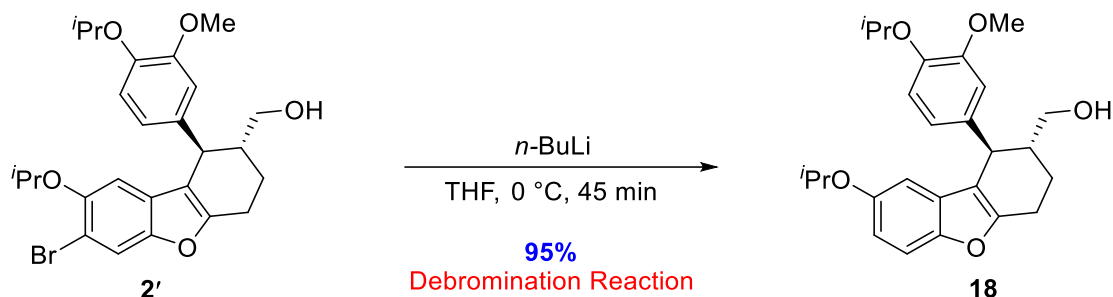

The compound **2'** (100 mg, 0.2 mol) was taken in a two neck RB flask in dry THF (2 mL), under an argon atmosphere at 0 °C. *n*BuLi (2.4 M in Hexanes) (0.21 mL, 0.500 mmol) was added dropwise and continued for 45 min. After the consumption of starting material, it was quenched with saturated NH<sub>4</sub>Cl (10 mL) and diluted with EtOAc (50 mL). The organic layer was successively washed with water (2×20 mL), brine, dried over anhydrous Na<sub>2</sub>SO<sub>4</sub>, and the solvent was removed under reduced pressure. The crude product was purified by column chromatography (hexanes/ethyl acetate, 3:1) to get the title compound **18** as a white solid (81 mg, 95%). **R<sub>f</sub>** = 0.3 (EA/PE = 1:1.5); **MP**: 112 – 114 °C; **[α]<sub>D</sub><sup>25</sup>**: +17.5 (c = 0.4, CHCl<sub>3</sub>); **<sup>1</sup>H NMR (400 MHz, Chloroform-*d*)** δ 7.24 (d, *J* = 8.8 Hz, 1H), 6.82 (d, *J* = 8.0 Hz, 1H), 6.74 – 6.68 (m, 3H), 6.07 (d, *J* = 2.6 Hz, 1H), 4.48 (hept, *J* = 6.1 Hz, 1H), 4.15 (hept, *J* = 6.1 Hz, 1H), 3.80 (d, *J* = 8.7 Hz, 1H), 3.75 (m, 1H), 3.74 (s, 3H), 3.58 (dd, *J* = 6.5, 10.6 Hz, 1H), 2.97 – 2.82 (m, 2H), 2.28 – 2.22 (m, 1H), 2.04 – 1.97 (m, 1H), 1.90 – 1.80 (m, 1H), 1.35 (dd, *J* = 1.7, 6.1 Hz, 6H), 1.19 (d, *J* = 6.1 Hz, 3H), 1.11 (d, *J* = 6.0 Hz, 3H); **<sup>13</sup>C NMR (100 MHz, Chloroform-*d*)** δ 154.8, 153.3, 150.5, 149.7, 146.1, 135.7, 128.7, 120.9, 115.9, 115.1, 113.4, 112.4, 110.9, 105.9, 71.5, 70.8, 64.8, 56.1, 45.5, 41.8, 25.2, 22.8, 22.1, 22.1, 22.0, 21.7; **IR (cm<sup>-1</sup>)** 3432, 2926, 1632, 1465, 1510, 1263; **HRMS(ESI-TOF) m/z** [M+Na]<sup>+</sup> calcd for C<sub>26</sub>H<sub>32</sub>NaO<sub>5</sub><sup>+</sup> 447.2142; found 447.2144.

**Synthesis of ((1*R*,2*R*)-8-isopropoxy-1-(4-isopropoxy-3-methoxyphenyl)-7-phenyl-1,2,3,4-tetrahydrodibenzo[*b,d*]furan-2-yl)methyl acetate (**19**)**

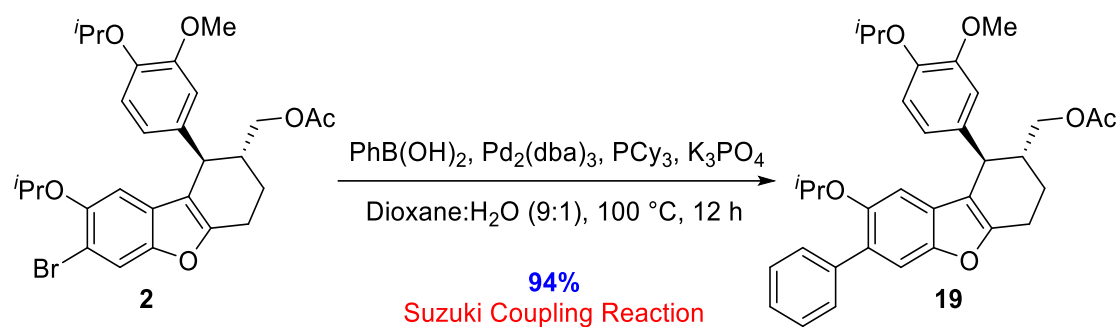

To a 5 mL oven-dried micro- reactor added compound **2** (100 mg, 0.184 mmol), Pd<sub>2</sub>dba<sub>3</sub> (17 mg, 0.0184 mmol), K<sub>3</sub>PO<sub>4</sub> (78 mg, 0.368 mmol), tricyclohexylphosphine (10 mg, 0.0368 mmol), phenylboronic acid (27 mg, 0.221 mmol) and degassed (purged with Ar for 30 min) 1,4-dioxane: H<sub>2</sub>O (9:1) (2.0 mL) inside the glove box. It was then heated to 100 °C in a preheated oil bath for 20 h. Upon completion of the reaction, water (20 mL) was added and the organic mixture was extracted with EtOAc (3×50 mL). The combined organic extracts were successively washed with water (20 mL), brine, dried over Na<sub>2</sub>SO<sub>4</sub>, and concentrated *in vacuo*. The crude product obtained was purified by column chromatography to afford the title compound **19** (94 mg; 94%) as a gummy liquid. **R<sub>f</sub>** 0.6 (Hexanes/EtOAc 1.5:1); [ $\alpha$ ]<sub>D</sub><sup>25</sup>: +16.51 (c = 1.06, CHCl<sub>3</sub>); **<sup>1</sup>H NMR (800 MHz, Chloroform-*d*)**  $\delta$  7.53 (d, *J* = 7.8 Hz, 2H), 7.36 (t, *J* = 7.7 Hz, 2H), 7.33 (s, 1H), 7.28 (t, *J* = 7.4 Hz, 1H), 6.85 (d, *J* = 8.2 Hz, 1H), 6.75 (dd, *J* = 1.9, 8.2 Hz, 1H), 6.73 (d, *J* = 1.9 Hz, 1H), 6.13 (s, 1H), 4.49 (hept, *J* = 6.2 Hz, 1H), 4.14 (dd, *J* = 4.1, 11.0 Hz, 1H), 4.07 (dd, *J* = 6.9, 11.0 Hz, 1H), 3.89 (hept, *J* = 6.0 Hz, 1H), 3.81 (d, *J* = 9.0 Hz, 1H), 3.78 (s, 3H), 2.97 – 2.93 (m, 1H), 2.91 – 2.88 (m, 1H), 2.24 – 2.18 (m, 2H), 2.06 (s, 3H), 1.89 – 1.84 (m, 1H), 1.35 (dd, *J* = 4.9, 6 Hz, 6H), 1.03 (d, *J* = 6.1 Hz, 3H), 0.96 (d, *J* = 6.1 Hz, 3H); **<sup>13</sup>C NMR (200 MHz, Chloroform-*d*)**  $\delta$  171.1, 154.7, 150.4, 150.0, 146.3, 139.3, 134.8, 129.7, 128.5, 127.7, 127.5, 126.4, 120.9, 115.6, 114.9, 112.4, 112.3, 106.9, 71.7, 71.3, 66.1, 56.1, 42.2, 42.1, 25.6, 22.7, 22.1, 22.1, 21.8, 21.5, 20.9; **IR (cm<sup>-1</sup>)** 2976, 29929, 1740, 1509, 1468, 1427, 1383, 1369, 1232, 1183, 1165, 1138, 1112, 1036; **HRMS(ESI-TOF) m/z** [M+Na]<sup>+</sup> calcd for C<sub>34</sub>H<sub>38</sub>NaO<sub>6</sub><sup>+</sup> 565.2561; found 565.2562.

**Synthesis of ((1*R*,2*R*)-8-isopropoxy-1-(4-isopropoxy-3-methoxyphenyl)-7-vinyl-1,2,3,4-tetrahydrodibenzo[*b,d*]furan-2-yl)methyl acetate (**20**)**

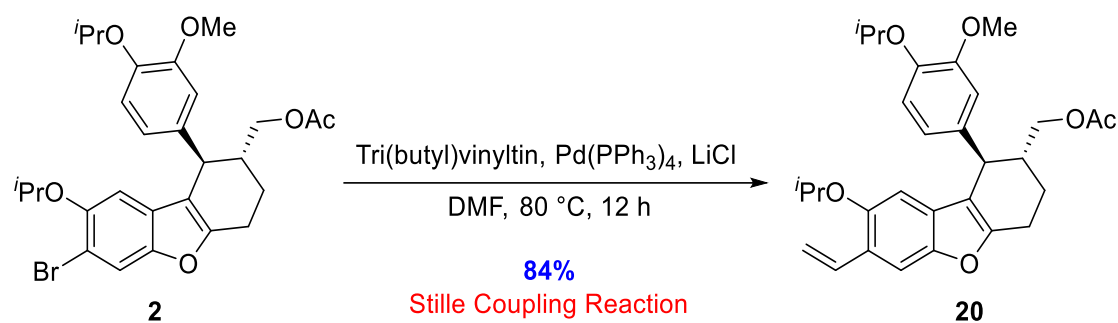

The compound **2** (100 mg, 0.184 mmol) was taken in a two-neck RB flask in dry DMF (2 mL), argon was flushed for 10 times. Pd(PPh<sub>3</sub>)<sub>4</sub> (21 mg, 0.0184 mmol), LiCl (15 mg, 0.368 mmol), and tributyl(vinyl)tin (0.06 mL, 0.202 mmol) were successively added to the reaction mixture. The reaction flask was again flushed with argon 6 times and heated to 80 °C in a preheated oil bath and continued for 12 h. After cooling to rt, the mixture was diluted with diethyl ether (50 mL) and filtered through a short pad of celite. The residue part was again washed with diethyl ether (2×20 mL). The combined organic layer was successively washed with water (2×20 mL), brine, dried over anhydrous Na<sub>2</sub>SO<sub>4</sub>, and the solvent was removed under reduced pressure. The crude product was purified by column chromatography (hexanes/ethyl acetate, 4:1) to get the title compound **20** as a light yellowish viscous liquid (75 mg, 84%). *R<sub>f</sub>* = 0.3 (EA/PE = 1:1.5) [ $\alpha$ ]<sub>D</sub><sup>25</sup>: +27.52 (c = 1.09, CHCl<sub>3</sub>); <sup>1</sup>H NMR (400 MHz, Chloroform-*d*) δ 7.47 (s, 1H), 7.05 (dd, *J* = 17.8, 6.6 Hz, 1H), 6.82 (d, *J* = 8.2 Hz, 1H), 6.71 (dd, *J* = 8.1, 2.0 Hz, 1H), 6.68 (d, *J* = 2.0 Hz, 1H), 5.98 (s, 1H), 5.66 (dd, *J* = 17.7, 1.5 Hz, 1H), 5.16 (dd, *J* = 11.0, 1.5 Hz, 1H), 4.47 (hept, *J* = 6.1 Hz, 1H), 4.12 (dd, *J* = 11.1, 4.1 Hz, 1H), 4.07 – 3.99 (m, 2H), 3.77 – 3.76 (m, 1H), 3.74 (s, 3H), 2.96 – 2.83 (m, 2H), 2.23 – 2.1 (m, 2H), 2.04 (s, 3H), 1.89 – 1.79 (m, 1H), 1.35 (dd, *J* = 6.1, 2.4 Hz, 6H), 1.18 (d, *J* = 6.0 Hz, 3H), 1.07 (d, *J* = 6.0 Hz, 3H); <sup>13</sup>C NMR (100 MHz, Chloroform-*d*) δ 171.0, 154.9, 150.9, 150.5, 149.8, 146.2, 134.8, 132.4, 128.1, 124.23, 120.9, 115.8, 115.0, 112.6, 112.4, 107.3, 105.2, 71.4, 66.1, 56.0, 42.2, 42.1, 25.5, 22.8, 22.0, 22.0, 21.6, 20.8; IR (cm<sup>-1</sup>) 2976, 2933, 1740, 1620, 1512, 1445, 1229, 1112; HRMS(ESI-TOF) *m/z* [M+Na]<sup>+</sup> calcd for C<sub>30</sub>H<sub>36</sub>NaO<sub>6</sub><sup>+</sup> 515.2404; found 565.2418.

### Synthesis of 4-(benzofuran-2-yl) butanal 3a and its organocatalytic reactions toward synthesis of 1-aryl-2,3-tetrahydrodibenzo[*b,d*]furan 23



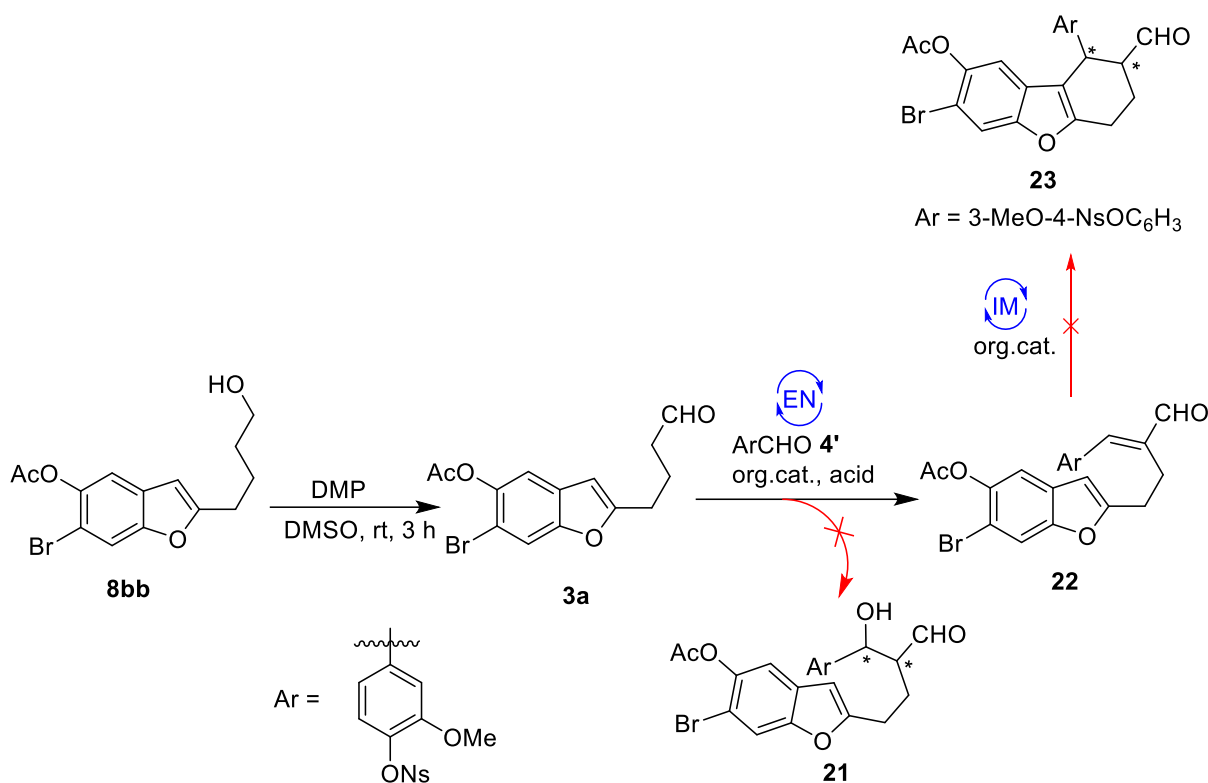

### Synthesis of 6-bromo-2-(4-oxobutyl)benzofuran-5-yl acetate (**3a**)

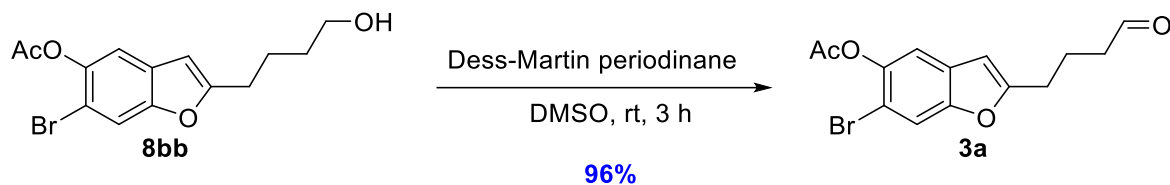

To a stirred solution of **8bb** (2.5 g, 7.65 mmol, 1.0 equiv.) in DMSO (40 mL) at rt, Dess-Martin periodinane (4.87 g, 11.48 mmol) was added. The combined reaction mixture was stirred for 3 h. After full consumption of starting material, it was diluted with diethyl ether (200 mL). The organic layer was rapidly washed with saturated aqueous Na<sub>2</sub>S<sub>2</sub>O<sub>3</sub> solution, then successively with saturated bicarbonate solution and water. The combined aqueous part again extracted with diethyl ether (100 mL). Then combined ether solution was washed with brine and dried over Na<sub>2</sub>SO<sub>4</sub> and concentrated under reduced pressure. The residue was purified by column chromatography (hexanes/EtOAc, 3:1) to afford **3a** (2.39 g, 96%) as a viscous liquid.  $R_f$  = 0.2 (hexanes/EtOAc, 4:1); <sup>1</sup>H NMR (400 MHz, Chloroform-*d*) δ 9.78 (s, 1H), 7.65 (s, 1H), 7.22 (s, 1H), 6.37 (s, 1H), 2.80 (t, *J* = 7.4 Hz, 2H), 2.53 (t, *J* = 7.2 Hz, 2H), 2.37 (s, 3H), 2.06 (p, *J* = 7.2 Hz, 2H); <sup>13</sup>C NMR (100 MHz, Chloroform-*d*) δ 201.4, 169.2, 160.2, 152.5, 143.6, 128.9, 115.1, 114.3, 110.7, 102.8, 42.8, 27.5, 20.8, 19.9. HRMS(ESI-TOF) *m/z* [M+Na]<sup>+</sup>

calcd for  $C_{14}H_{13}^{79}BrNaO_4Si^+ / C_{14}H_{13}^{81}BrNaO_4Si^+$  346.9889, and 348.9869; found 346.9892, and 348.9872 respectively.

### Synthesis of 4-formyl-2-methoxyphenyl 4-nitrobenzenesulfonate (4)

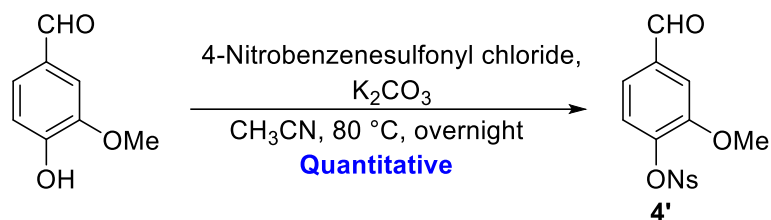

To a solution of vanillin (10 g, 65.72 mmol) in dry acetonitrile were added successively 4-nitrobenzenesulfonyl chloride (17.5 g, 78.86 mmol) and potassium carbonate (13.96 g, 118.30 mmol) at rt. The mixture was then heated at 80 °C under inert atmosphere for overnight. The reaction was quenched by addition of  $\text{NH}_4\text{Cl}$  saturated and diluted with ethyl acetate. After extraction with ethyl acetate (3 times), the combined organic layers were washed successively with water and brine, dried over  $\text{Na}_2\text{SO}_4$  and concentrated under reduced pressure. The pure compound was obtained by chromatography on silica gel (hexanes/EtOAc, 3:1) to afford nosyl-protected vanillin **4'** (21.73 g, quantitative).  $R_f = 0.25$  (hexanes/EtOAc, 4:1);  $^1\text{H NMR}$  (400 MHz,  $\text{DMSO-}d_6$ )  $\delta$  9.95 (s, 1H), 8.45 (d,  $J = 8.8$  Hz, 2H), 8.13 (d,  $J = 8.9$  Hz, 2H), 7.57 (dd,  $J = 1.8$  Hz, 8.2 Hz, 1H), 7.54 (s, 1H), 7.44 (d,  $J = 8.1$  Hz, 1H), 3.58 (s, 3H);  $^{13}\text{C NMR}$  (100 MHz,  $\text{DMSO-}d_6$ )  $\delta$  192.0, 151.7, 151.1, 141.4, 140.2, 136.3, 130.0, 124.7, 124.6, 123.2, 112.9, 55.9; IR ( $\text{cm}^{-1}$ ) 1705, 1533, 1498, 133, 1350, 1273, 1199, 1147, 1115, 1089. HRMS(ESI-TOF)  $m/z$   $[\text{M}+\text{Na}]^+$  calcd for  $C_{14}H_{11}NNaO_7S^+$  360.0148; found 360.0144.

**Table SI6. Unsuccessful trials of organocatalytic aldol reaction and optimization of aldol condensation reaction**

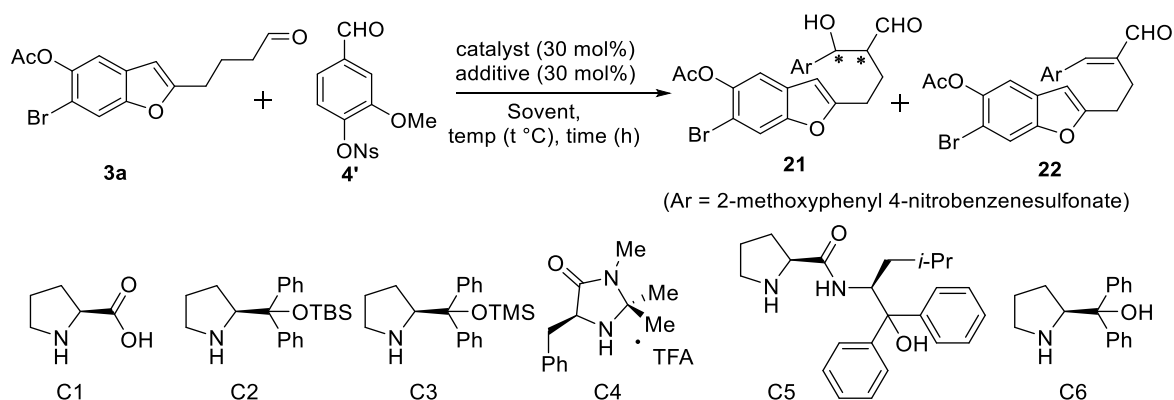

| entry           | Catalyst  | Additive                           | solvent                         | temp (°C) | time (h)  | Product   | Yield (%) |
|-----------------|-----------|------------------------------------|---------------------------------|-----------|-----------|-----------|-----------|
| 1               | C1        | -                                  | DMF                             | 4         | 72        | --        | NR        |
| 2               | C1        | -                                  | DMF                             | rt        | 48        | <b>21</b> | traces    |
| <b>3</b>        | <b>C1</b> | <b>H<sub>3</sub>PO<sub>4</sub></b> | <b>DMF</b>                      | <b>rt</b> | <b>30</b> | <b>22</b> | <b>74</b> |
| 4               | C1        | 4-nitro benzoic acid               | DMF                             | rt        | 30        | <b>22</b> | 52        |
| 5               | C1        | rac- BPA                           | DMF                             | rt        | 48        | <b>22</b> | 58        |
| 6               | C1        | TFA                                | DMF                             | rt        | 48        | <b>22</b> | 43        |
| 7               | C2-3      | -                                  | CH <sub>2</sub> Cl <sub>2</sub> | rt        | 24        | --        | NR        |
| 8               | C2-3      | -                                  | Toluene                         | rt        | 24        | --        | NR        |
| 9               | C2-3      | H <sub>3</sub> PO <sub>4</sub>     | DMF                             | rt        | 24        | --        | NR        |
| 10              | C4        | -                                  | CH <sub>2</sub> Cl <sub>2</sub> | rt        | 12        | --        | NR        |
| 11              | C4        | -                                  | DMF                             | rt        | 12        | --        | NR        |
| 12              | C3        | -                                  | CH <sub>2</sub> Cl <sub>2</sub> | rt        | 24        | --        | NR        |
| 13              | C3        | -                                  | DCE                             | rt        | 24        | --        | NR        |
| 14 <sup>b</sup> | C6        | -                                  | THF/H <sub>2</sub> O            | 20        | 48        | --        | NR        |
| 15 <sup>a</sup> | C5        | AcOH                               | DMSO                            | 0-4 to rt | 72        | --        | NR        |
| 16 <sup>a</sup> | C5        | AcOH                               | DMF                             | 0-4 to rt | 72        | --        | NR        |

All reactions were performed in 50 mg scale of the aldehyde **3a** using as a limiting reagent. Acceptor aldehyde **4'** was taken 5 equiv. <sup>a</sup>AcOH used 15 mol%, 5 mol% of C5 used, concentration 1M. <sup>b</sup> 3 mol% of C6 used. NR = No reaction.

**Synthesis of (E)-6-bromo-2-(3-formyl-4-(3-methoxy-4-(((4-nitrophenyl)sulfonyl)oxy)phenyl)but-3-en-1-yl)benzofuran-5-yl acetate (**22**)**

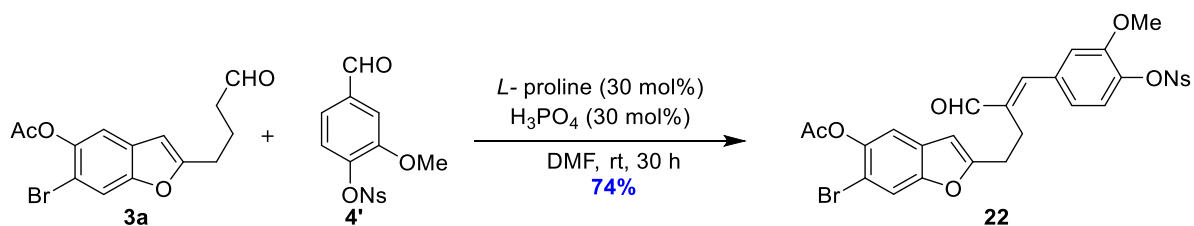

To a stirred solution of benzofuran aldehyde **3a** (500 mg, 1.54 mmol) and *L*-proline (53 mg, 0.46 mmol) in DMF (15.4 mL) at rt nosyl protected vanillin **4'** (2.6 g, 7.7 mmol) was added at a time and continued the reaction for 30 h at the same temperature. The reaction mixture was diluted with diethyl ether (200 mL) and water 50 mL. The aqueous part was again extracted with diethyl ether (2×50 mL). Next combined organic layers were washed with brine, dried over Na<sub>2</sub>SO<sub>4</sub>, and concentrated under reduced pressure. The pure compound was obtained by chromatography on silica gel (hexanes/EtOAc, 9:1 to 4:1) to afford **22** (733 mg) as a light green solid. **Yield:** 74%. **R<sub>f</sub>** = 0.25 (hexanes/EtOAc, 3:1); **<sup>1</sup>H NMR (400 MHz, Chloroform-*d*)** δ 9.60 (s, 1H), 8.42 (d, *J* = 8.4 Hz, 2H), 8.17 (d, *J* = 8.4 Hz, 2H), 7.54 (s, 1H), 7.29 (d, *J* = 10.0 Hz, 2H), 7.22 (s, 1H), 6.99 (d, *J* = 8.4 Hz, 1H), 6.84 (s, 1H), 6.35 (s, 1H), 3.55 (s, 3H), 2.98 (s, 4H), 2.40 (s, 3H); **<sup>13</sup>C NMR (100 MHz, Chloroform-*d*)** δ 194.7, 169.1, 159.5, 152.4, 151.5, 150.9, 149.3, 143.7, 142.0, 141.9, 138.5, 134.9, 129.9, 128.8, 124.3, 124.0, 122.0, 115.0, 114.4, 113.2, 111.0, 103.2, 55.6, 26.7, 23.3, 20.8; **IR (cm<sup>-1</sup>)** 2976, 1764, 1681, 1532, 1500, 1450, 1404, 1377, 1348, 1205, 1185, 1160, 1120, 1090. **HRMS(ESI-TOF) m/z** [M+Na]<sup>+</sup> calcd for C<sub>28</sub>H<sub>22</sub><sup>79</sup>BrNNaO<sub>10</sub>S<sup>+</sup>/ C<sub>28</sub>H<sub>22</sub><sup>81</sup>BrNNaO<sub>10</sub>S<sup>+</sup> 666.0040, and 668.0020; found 666.0046, and 668.0016 respectively.

## HPLC chromatogram of aldol product 2

Sample Info : SAMPLE-342, PURE  
 MeOH/WATER- 80/20  
 FLOW RATE:..1.0mL/min  
 254nm  
 C18

Additional Info : Peak(s) manually integrated

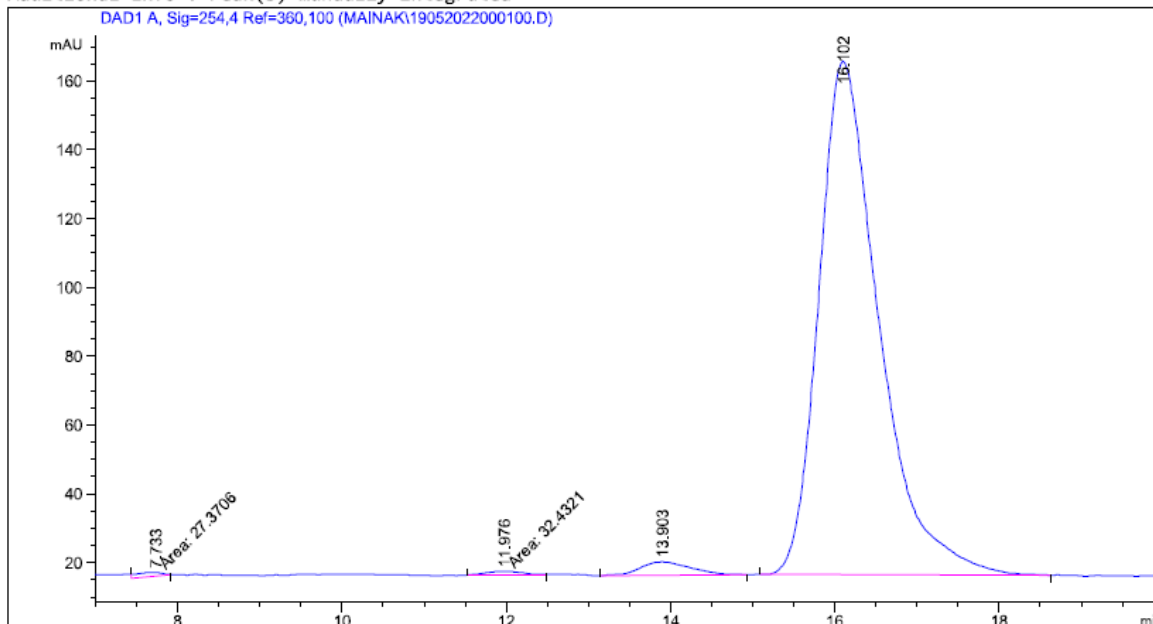

Signal 1: DAD1 A, Sig=254,4 Ref=360,100

| Peak # | RetTime [min] | Type | Width [min] | Area [mAU*s] | Height [mAU] | Area %  |
|--------|---------------|------|-------------|--------------|--------------|---------|
| 1      | 7.733         | MM   | 0.3141      | 27.37062     | 1.05599      | 0.3502  |
| 2      | 11.976        | MM   | 0.5207      | 32.43206     | 1.03800      | 0.4150  |
| 3      | 13.903        | BB   | 0.5181      | 172.42802    | 3.92818      | 2.2065  |
| 4      | 16.102        | BB   | 0.7489      | 7582.45020   | 149.19926    | 97.0283 |

Totals : 7814.68089 155.22144

## References

- 1) Liu, S.; Jin, Z.; Teo, Y. C.; Xia, Y. *J. Am. Chem. Soc.* **2014**, *136*, 17434–17437.
- 2) Banskota, A. H.; Tezuka, Y.; Midorikawa, K.; Matsushige, K.; Kadota, S. *J. Nat. Prod.* **2000**, *63*, 1277–1279.
- 3) Nacsa, E. D.; MacMillan, D. W. C. *J. Am. Chem. Soc.* **2018**, *140*, 3322–3330.
- 4) (a) Roane, J.; Wippich, J.; Ramgren, S. D.; Krische, M. J. *Org. Lett.* **2017**, *19*, 6634–6637.  
(b) Boeckman, Jr. R. K.; Tusch, D. J.; Biegasiewicz, K. F. *Organic Synth* **2015**, *92*, 309–319.  
(c) Price, M. D.; Kurth, M. J.; Schore, N. E. *J. Org. Chem.* **2002**, *67*, 7769–7773. (d) Murar, C. E.; Thuaud, F.; Bode, J. W. *J. Am. Chem. Soc.* **2014**, *136*, 18140–18148.
- 5) (a) Granander, J.; Sott, R.; Hilmersson, G. *Tetrahedron* **2002**, *58*, 4717–4725. (b) Evans, D. A.; Mathre, D. J.; Scott, W. L. *J. Org. Chem.* **1985**, *50*, 1830–1835. (c) Gage, R. J.; Evans, D. A. *Organic Synth* **1990**, *68*, 77.
- 6) Guay, B.; Deslongchamps, P. *J. Org. Chem.* **2003**, *68*, 6140–6148.

# SPECTRA

## $^1\text{H}$ NMR of 2,5-dibromo-1,4-phenylene diacetate (**5b**) (400 MHz, $\text{CDCl}_3$ )

BS-SH-239

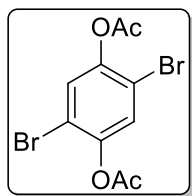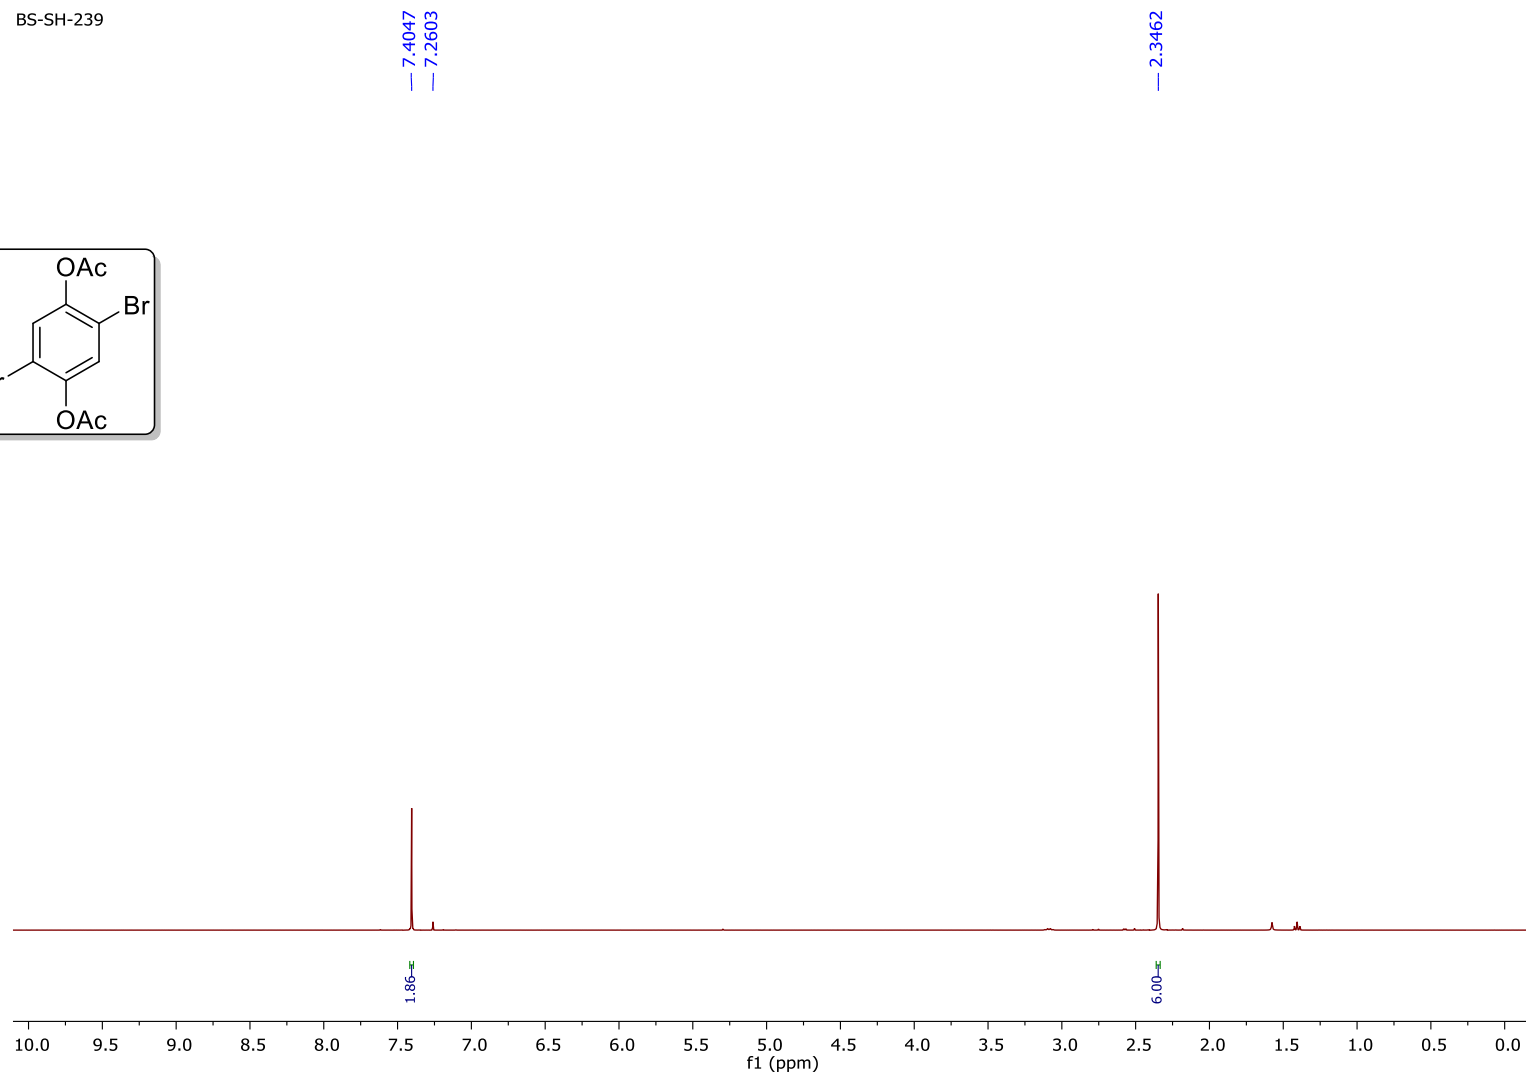

**$^{13}\text{C}$  NMR of 2,5-dibromo-1,4-phenylene diacetate (5b) (100 MHz,  $\text{CDCl}_3$ )**

BS-SH-239  
13C

168.01

146.41

127.74

115.29

77.34  
77.02  
76.71

20.66

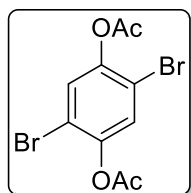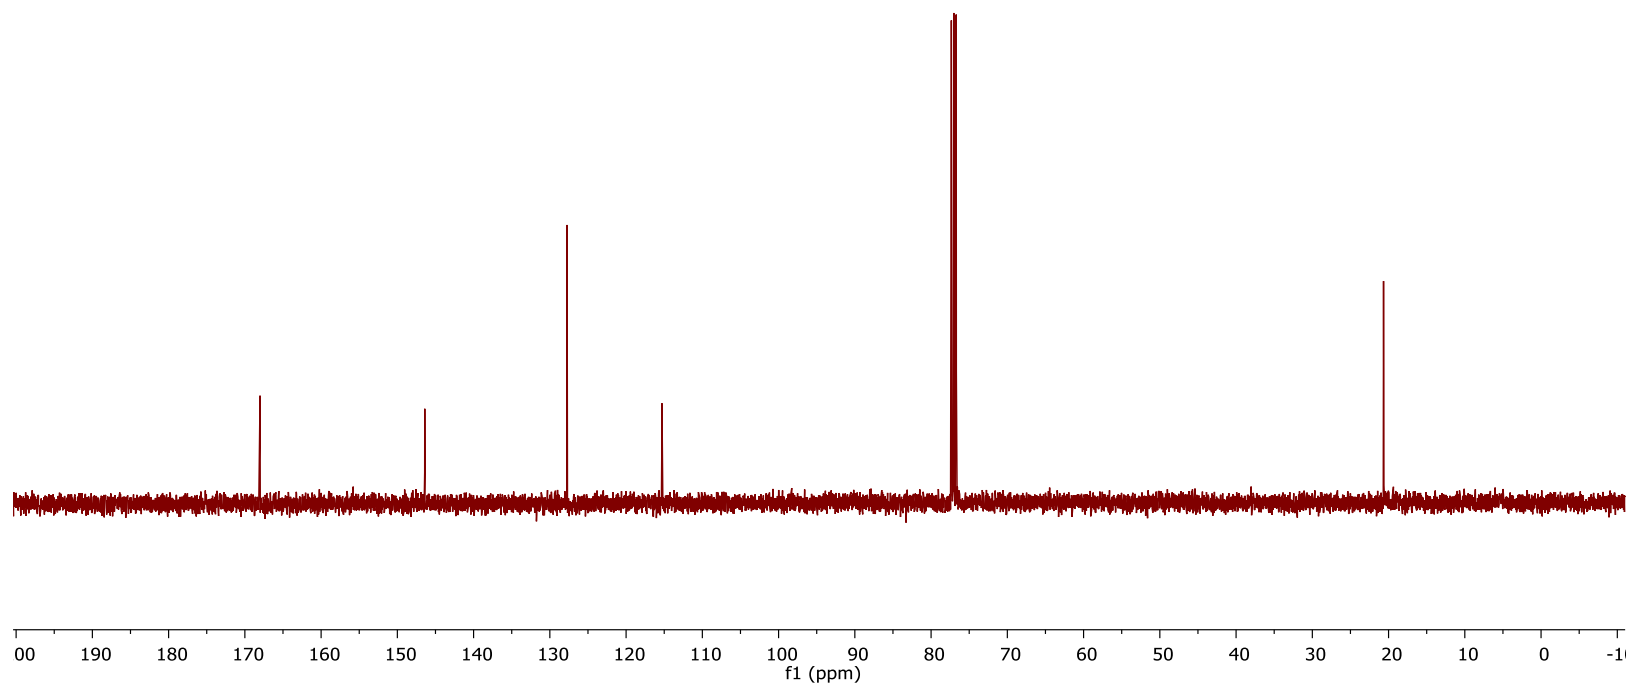



**<sup>1</sup>H NMR of *tert*-butyl(hex-5-yn-1-yloxy)dimethylsilane (6a) (400 MHz, CDCl<sub>3</sub>)**

Sep07-2022.40.fid  
BS-TBS-5-Hexyn-1-ol  
07092022

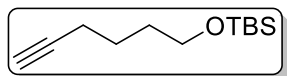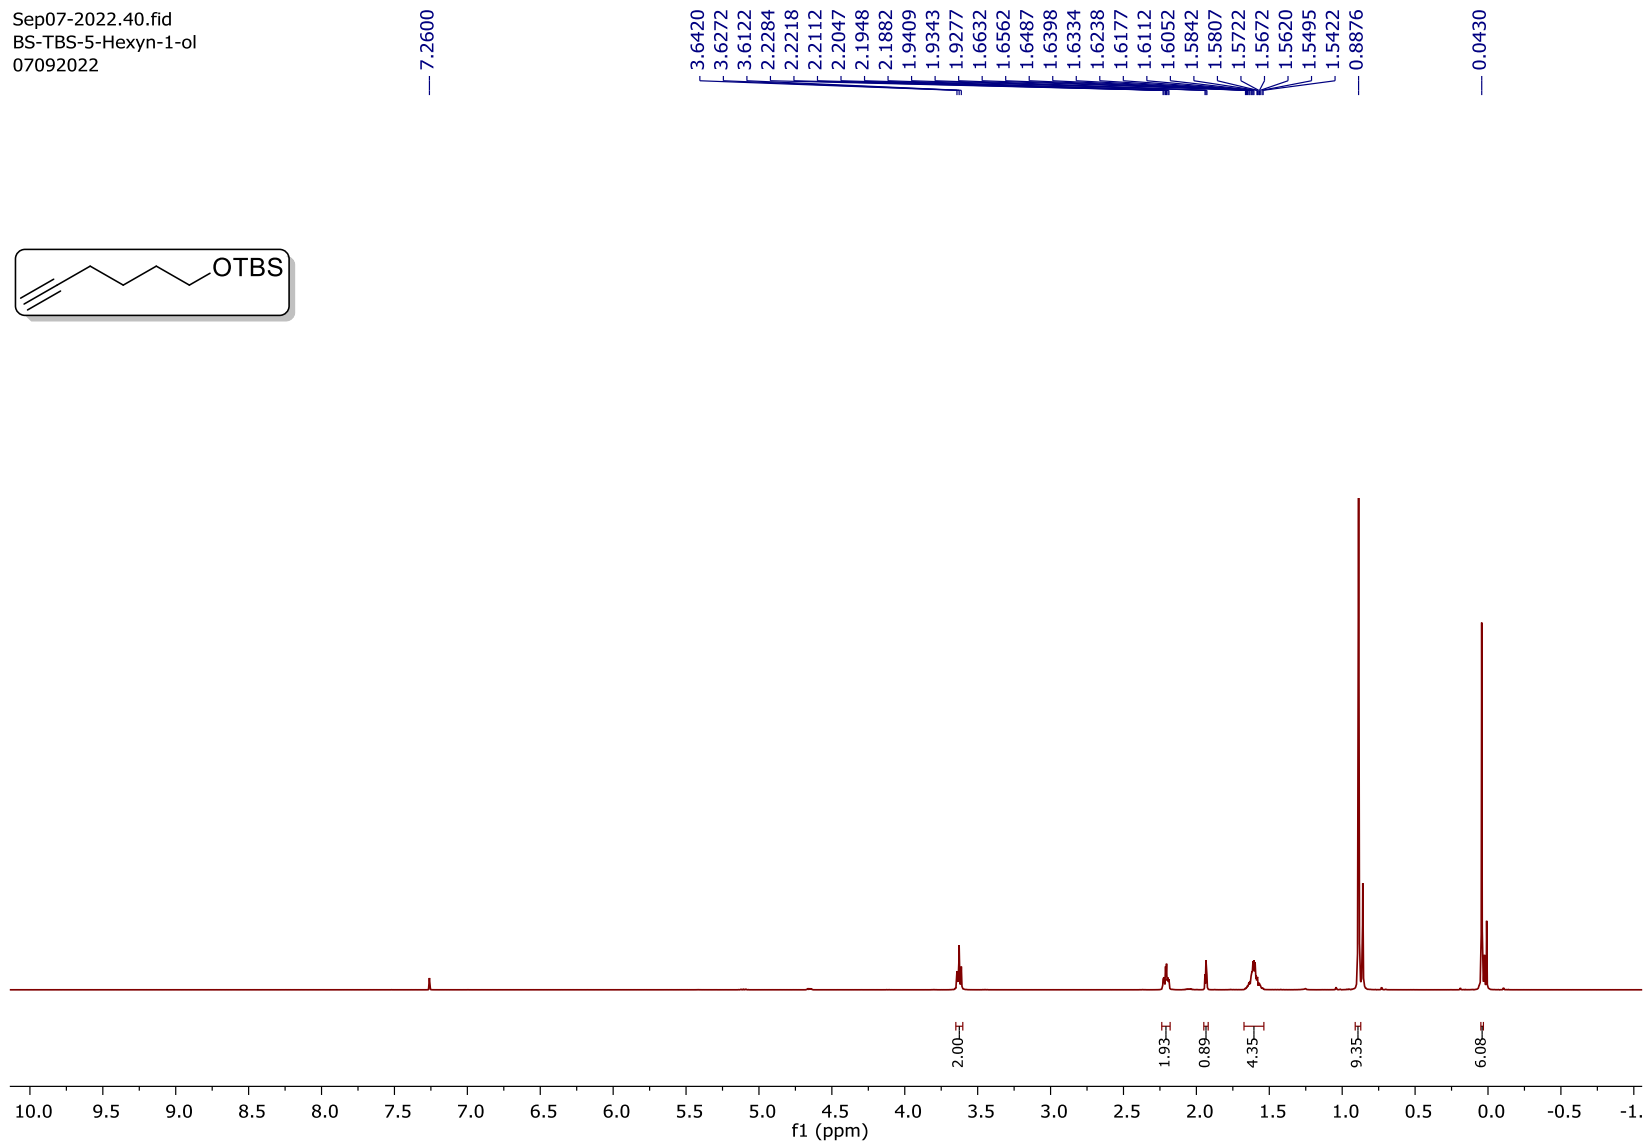

**<sup>13</sup>C NMR of *tert*-butyl(hex-5-yn-1-yloxy)dimethylsilane (6a) (100 MHz, CDCl<sub>3</sub>)**

Sep07-2022.41.fid  
BS-TBS-5-Hexyn-1-ol  
07092022

84.50  
77.32  
77.00  
76.68  
68.24  
62.57  
31.79  
25.93  
24.93  
18.32  
18.19  
-5.33

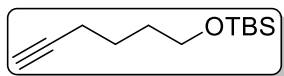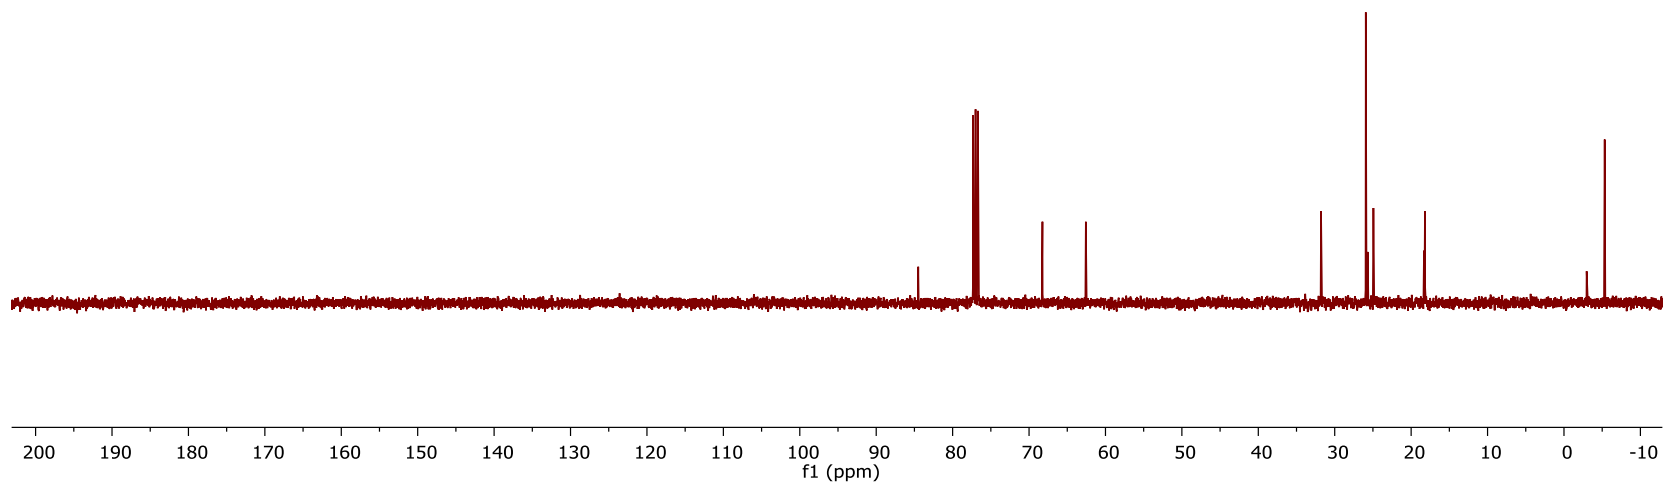

**<sup>1</sup>H NMR of 6-bromo-2-(4-((*tert*-butyldimethylsilyl)oxy)butyl)benzofuran-5-yl acetate (8ba) (400 MHz, CDCl<sub>3</sub>)**

BS-243-Mid spot  
03092018

7.6446  
7.6424

7.2604  
7.2143

6.3493  
6.3470

3.6641  
3.6484  
3.6328

2.7816  
2.7633  
2.7443

2.3669

1.8268  
1.8083  
1.7890

1.7703  
1.7513  
1.6331  
1.6178  
1.6030  
1.5971  
1.5798  
1.5522  
0.8971

0.0510

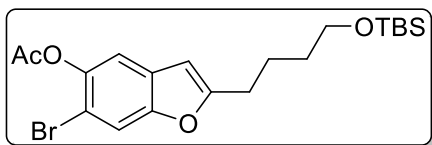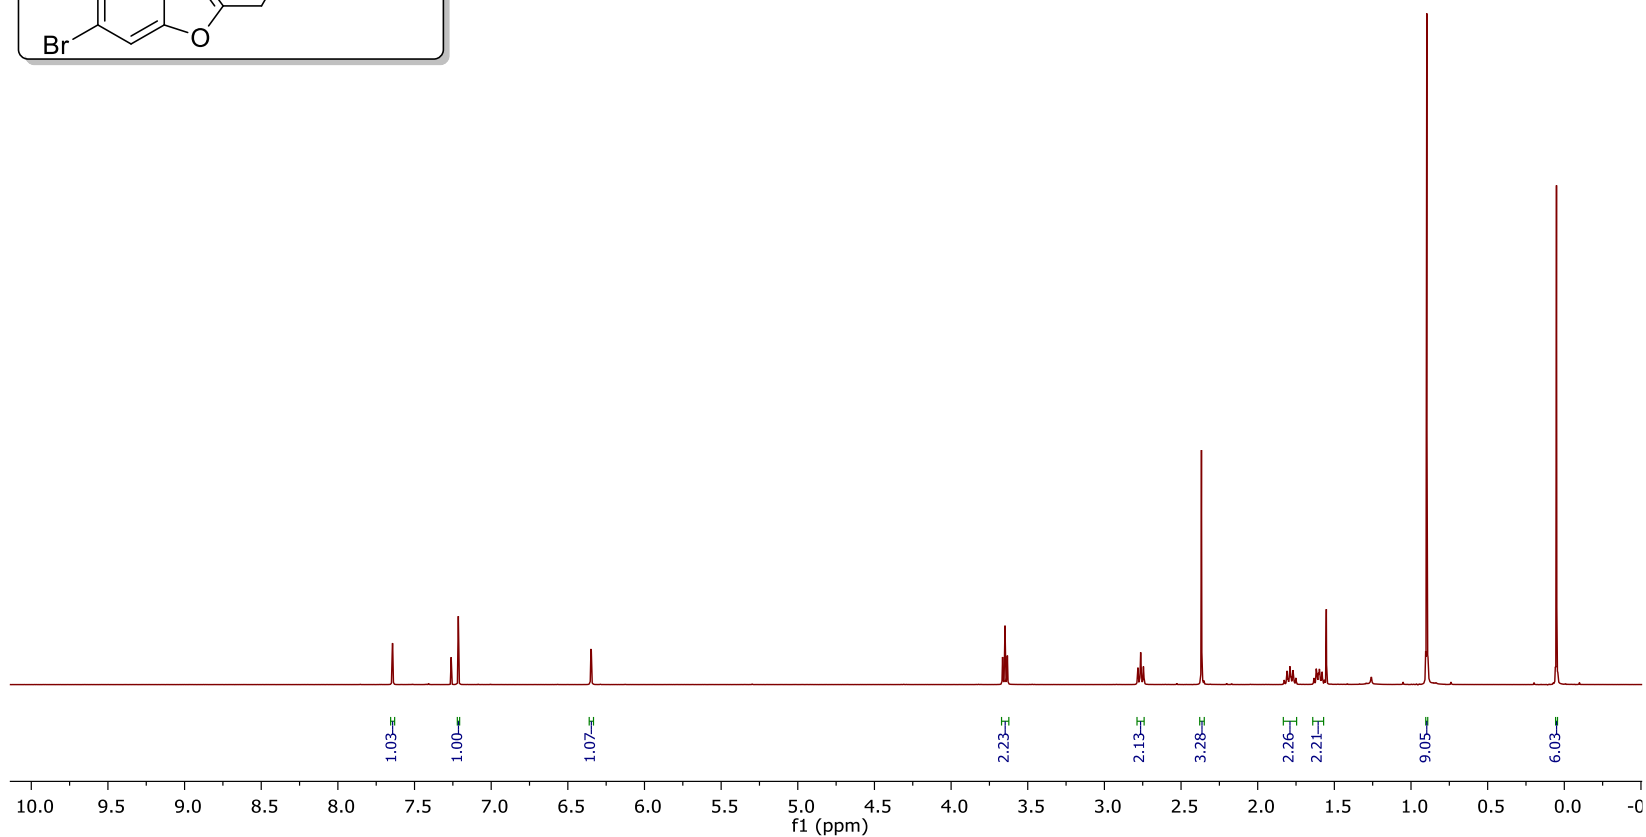

**<sup>13</sup>C NMR of 6-bromo-2-(4-((*tert*-butyldimethylsilyl)oxy)butyl)benzofuran-5-yl acetate (8ba) (100 MHz, CDCl<sub>3</sub>)**

BS-243-Mid spot  
03092018

- 169.22
- 161.73
- 152.49
- 143.47
- 129.17
- 115.06
- 114.09
- 110.35
- 102.10
- 77.33
- 77.01
- 76.69
- 62.66
- 32.13
- 28.21
- 25.96
- 23.96
- 20.83
- 18.35
- -5.29

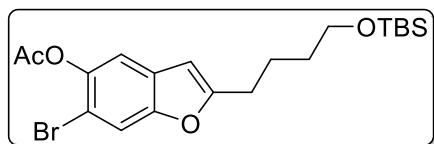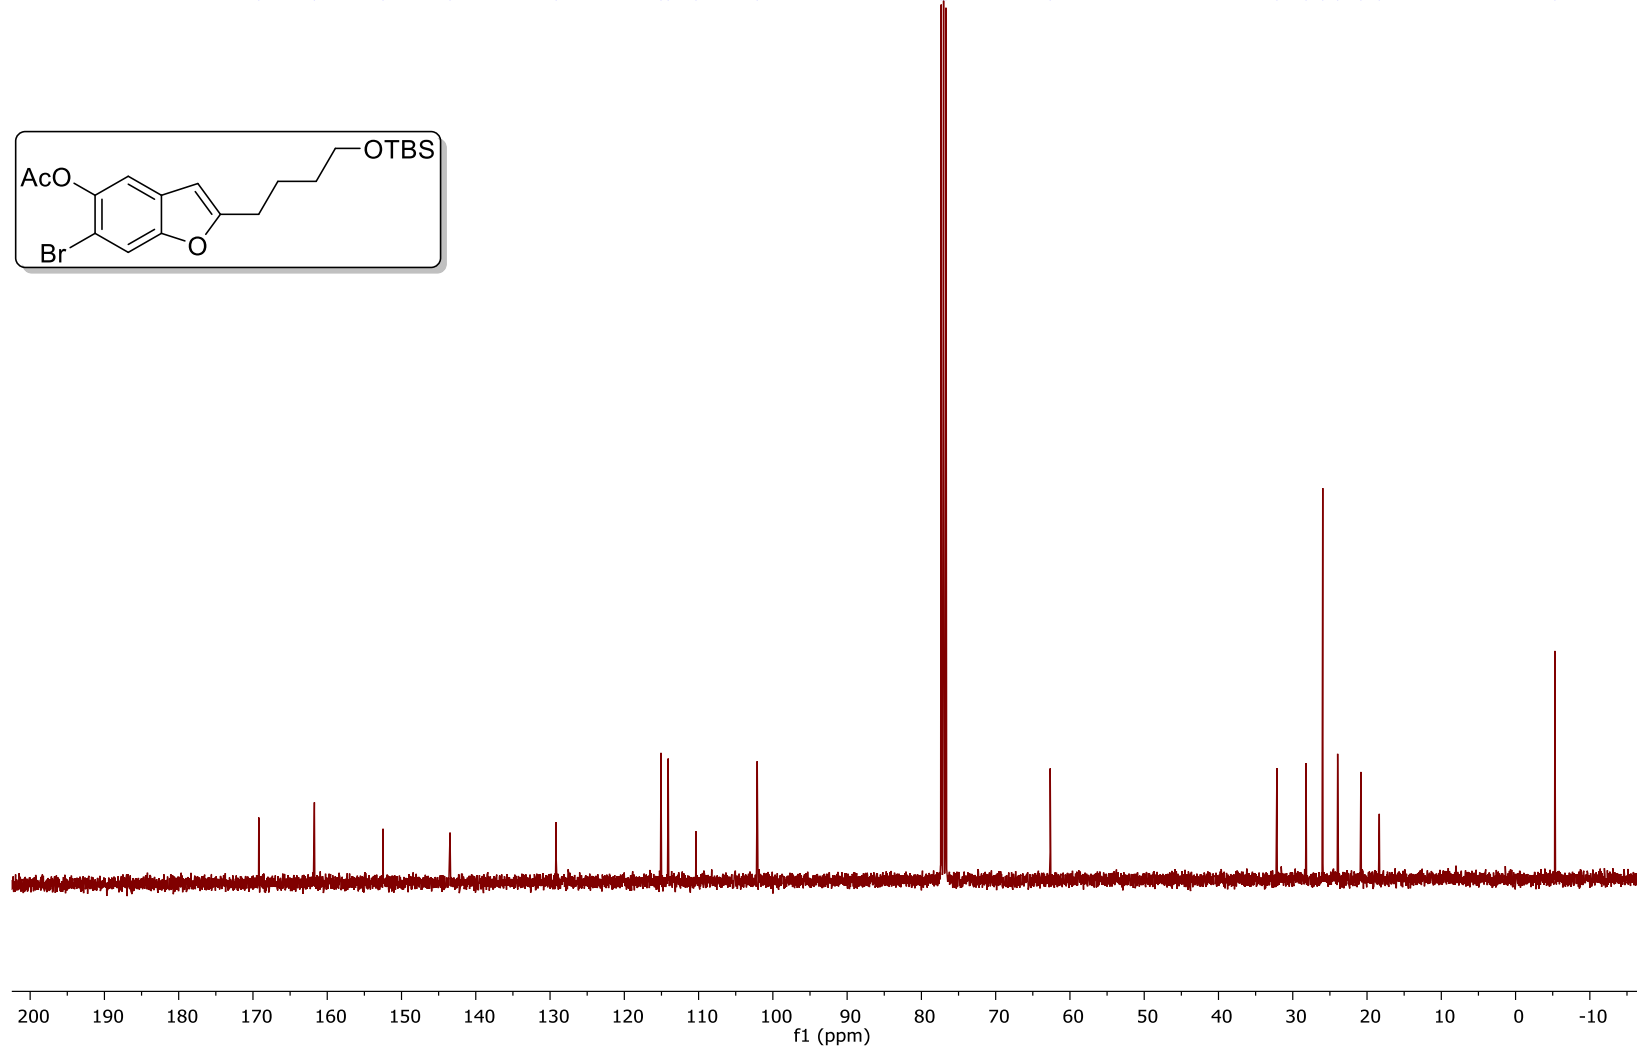

**<sup>1</sup>H NMR of 6-bromo-2-(4-hydroxybutyl)benzofuran-5-yl acetate (8bb) (400 MHz, DMSO-*d*<sub>6</sub>)**

BS- Propolis B- Rxn 262- DMSO

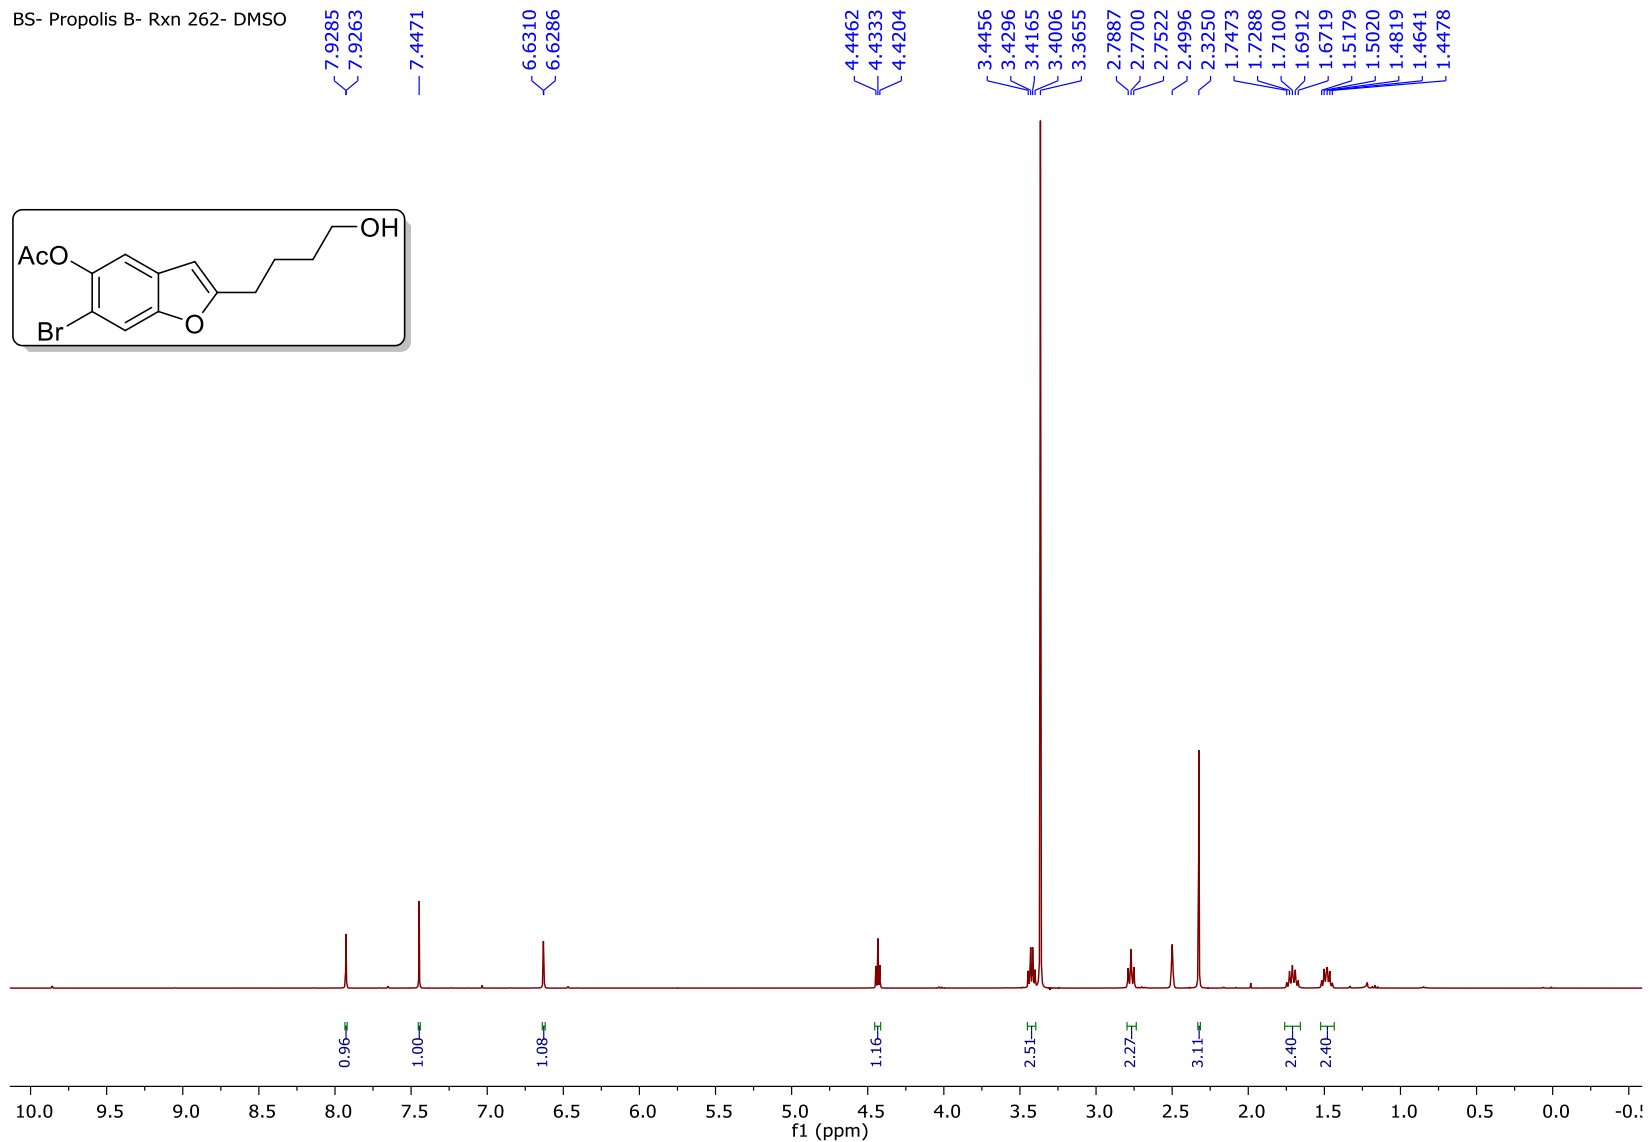

# D<sub>2</sub>O exchanged <sup>1</sup>H NMR of 6-bromo-2-(4-hydroxybutyl)benzofuran-5-yl acetate (8bb) (400 MHz, DMSO-*d*<sub>6</sub>)

BS- Propolis B- Rxn 262- DMSO D2O exchange

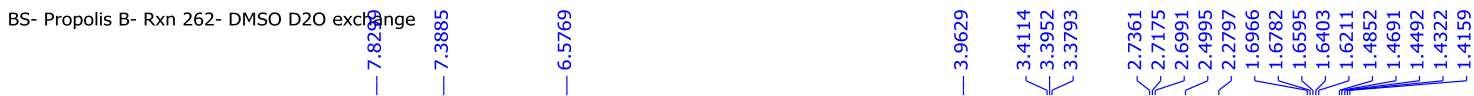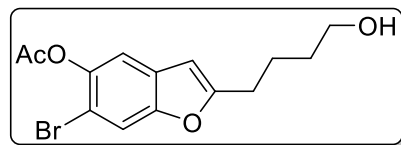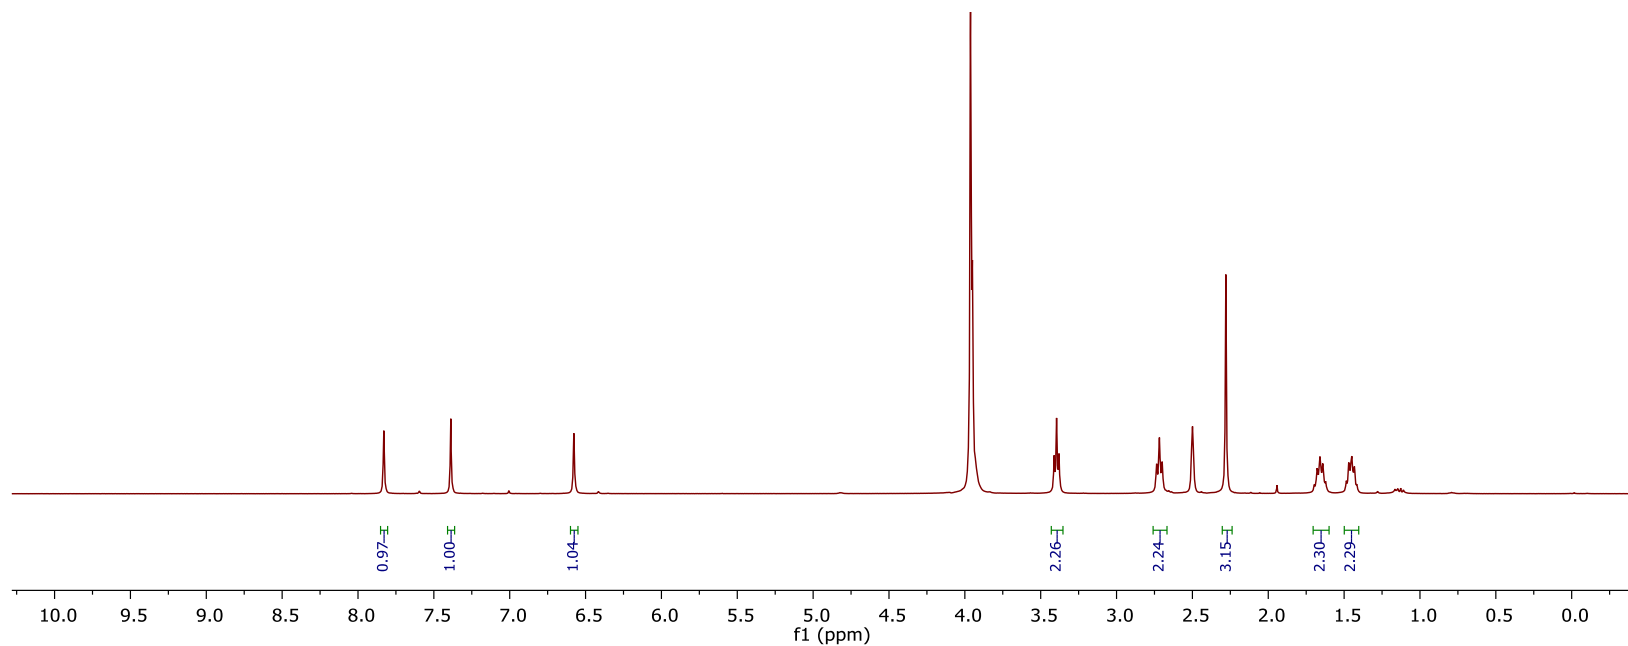

**<sup>13</sup>C NMR of 6-bromo-2-(4-hydroxybutyl)benzofuran-5-yl acetate (8bb) (100 MHz, DMSO-*d*<sub>6</sub>)**

BS- Propolis B- Rxn 262- DMSO

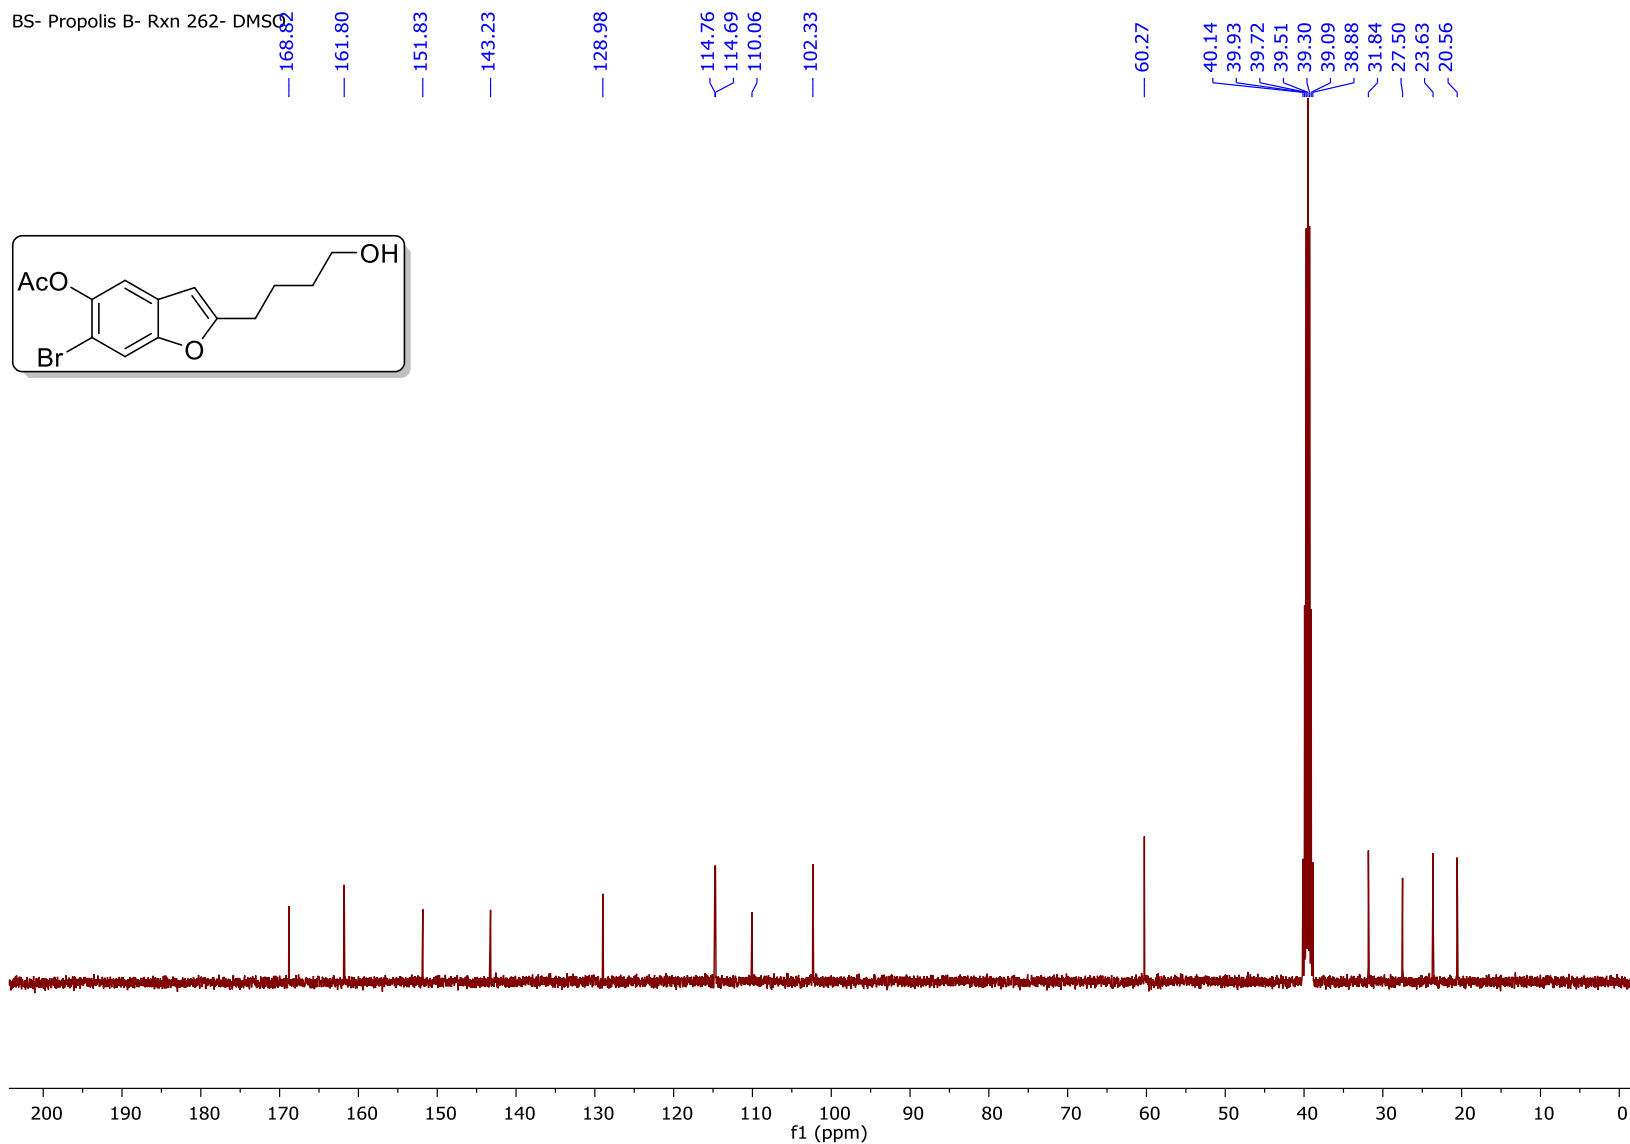

# <sup>1</sup>H NMR of 4-(6-bromo-5-isopropoxybenzofuran-2-yl)butan-1-ol (9) (400 MHz, CDCl<sub>3</sub>)

Aug18-2022.20.fid  
BS-iPr-Benzofuran alcohol-18082022

7.5860  
7.5837  
7.2598  
7.0192  
6.2938  
6.2914  
4.5132  
4.4980  
4.4828  
4.4676  
4.4524  
4.4371  
4.4220  
3.6880  
3.6718  
3.6559  
2.7678  
2.7494  
2.7308  
1.8404  
1.8220  
1.8026  
1.7837  
1.7648  
1.6772  
1.6612  
1.6400  
1.6234  
1.6065  
1.3829  
1.3677

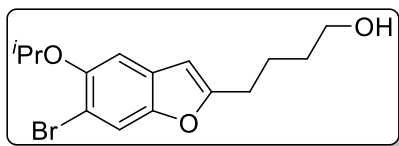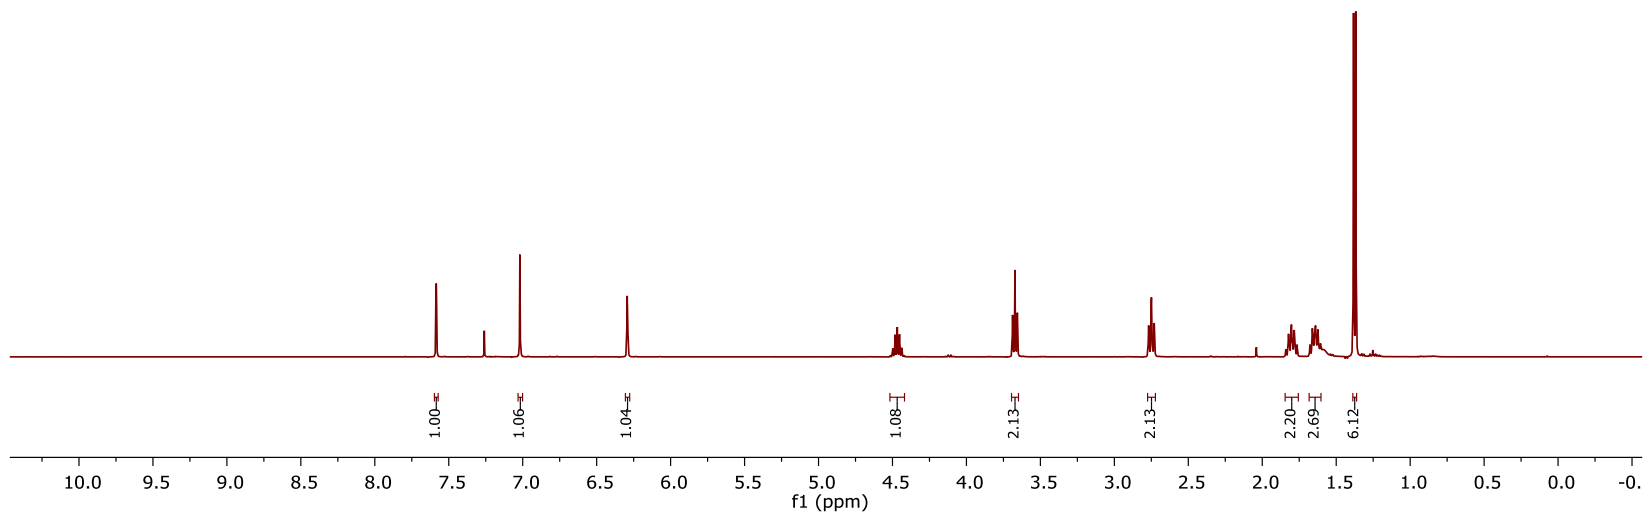



**<sup>13</sup>C NMR of 4-(6-bromo-5-isopropoxybenzofuran-2-yl)butan-1-ol (9) (100 MHz, CDCl<sub>3</sub>)**

Aug18-2022.21.fid  
BS-iPr-Benzofuran alcohol-18082022

— 160.45  
— 150.33  
— 149.74  
— 128.74  
— 115.12  
— 109.94  
— 107.90  
— 102.06  
— 77.32  
— 77.00  
— 76.68  
— 73.51  
— 62.42  
— 32.02  
— 28.15  
— 23.82  
— 22.03

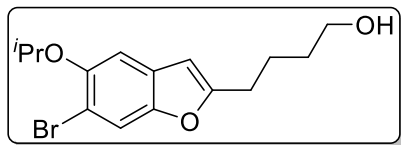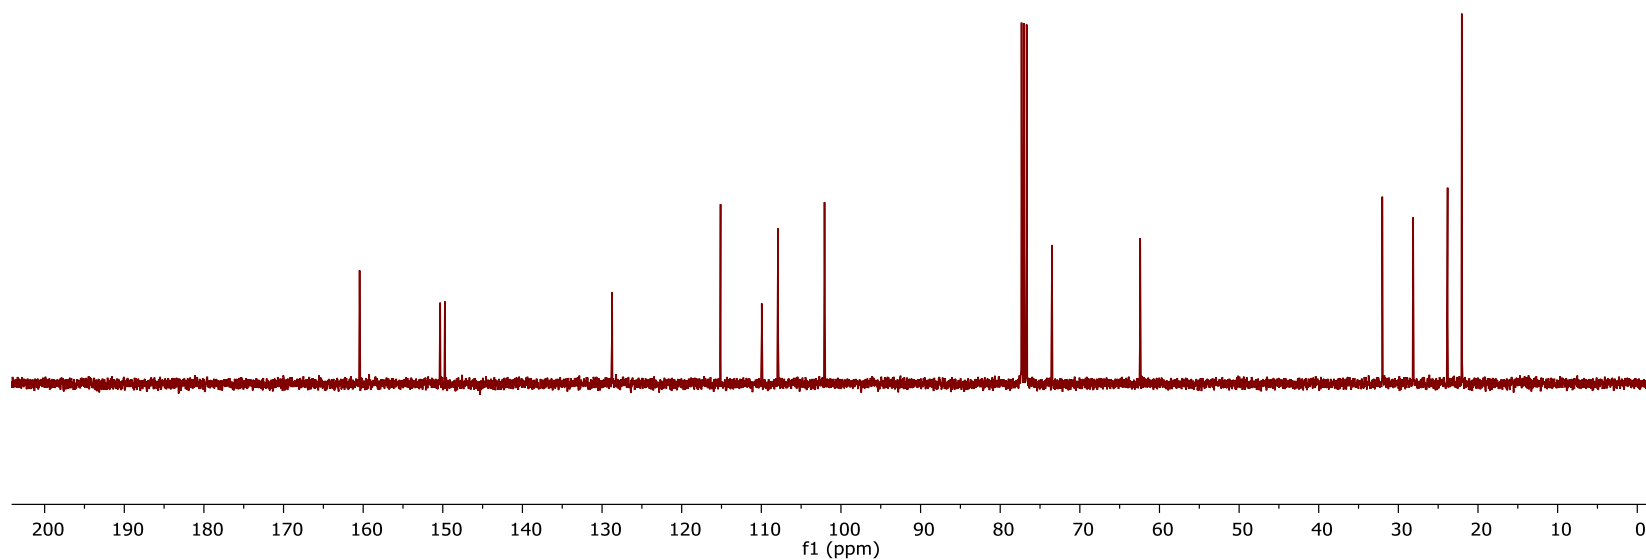

# <sup>1</sup>H NMR of 4-(6-bromo-5-isopropoxybenzofuran-2-yl)butanoic acid (10) (400 MHz, CDCl<sub>3</sub>)

Sep04-2022.20.fid  
bs-iPr-Benzofuran acid-04092022

7.6000  
7.5976  
7.2600  
7.0285  
6.3313  
6.3286  
4.5226  
4.5075  
4.4923  
4.4771  
4.4619  
4.4467  
4.4315  
2.8224  
2.8041  
2.7858  
2.4644  
2.4461  
2.4279  
2.1008  
2.0827  
2.0643  
2.0461  
2.0277  
1.3894  
1.3741

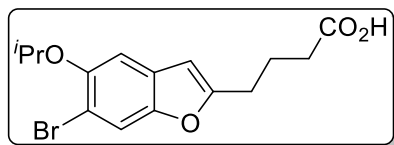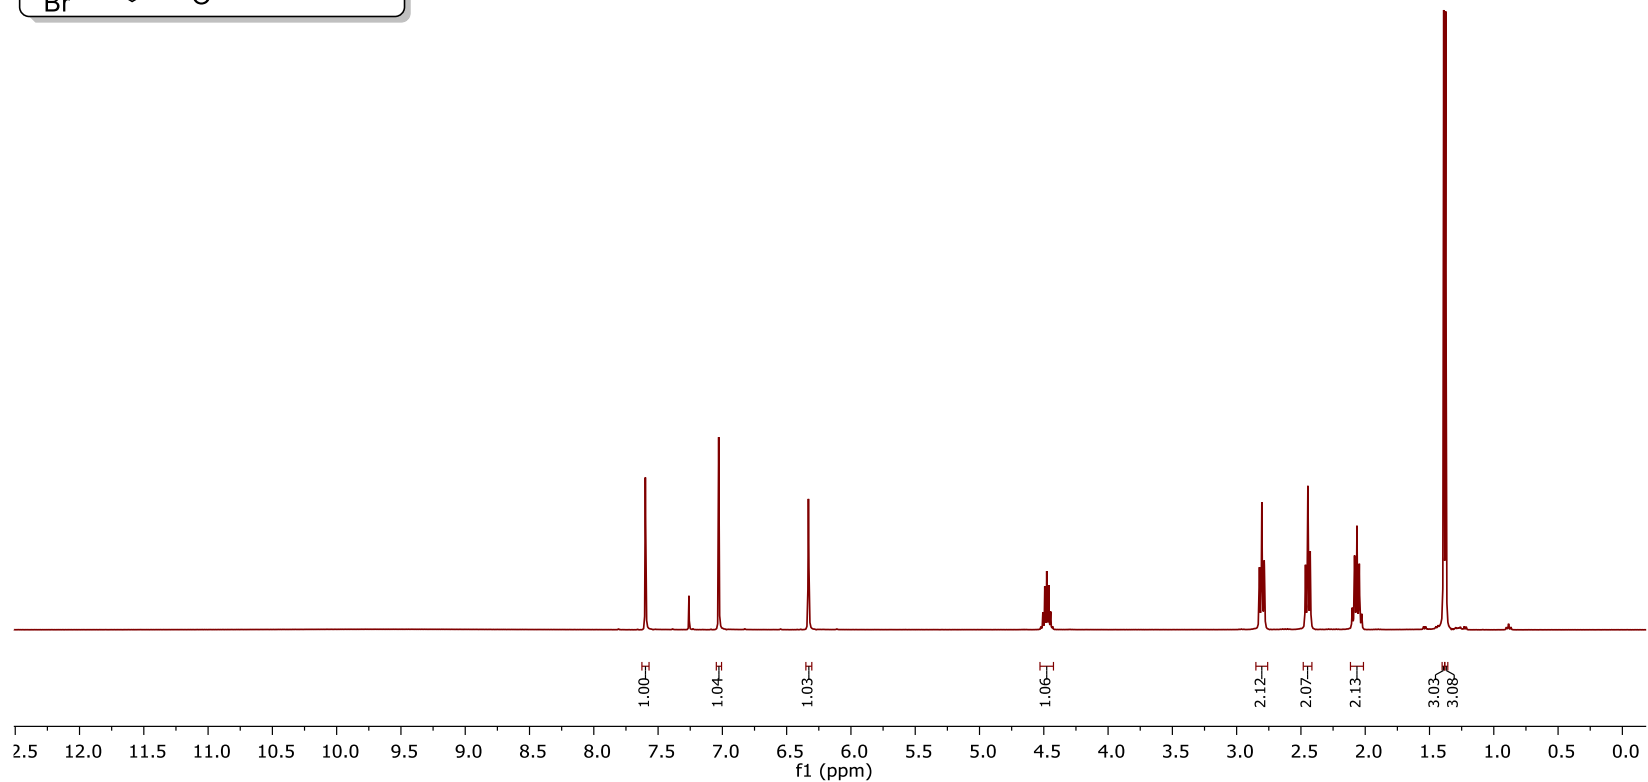

**<sup>13</sup>C NMR of 4-(6-bromo-5-isopropoxybenzofuran-2-yl)butanoic acid (10) (100 MHz, CDCl<sub>3</sub>)**

Sep04-2022.21.fid  
bs-iPr-Benzofuran ac-04092022

177.35

159.21

150.43  
149.81

128.60

115.22  
110.21  
107.91  
102.67

77.32  
77.00  
76.68  
73.50

33.02  
27.58  
22.53  
22.03

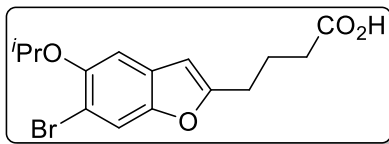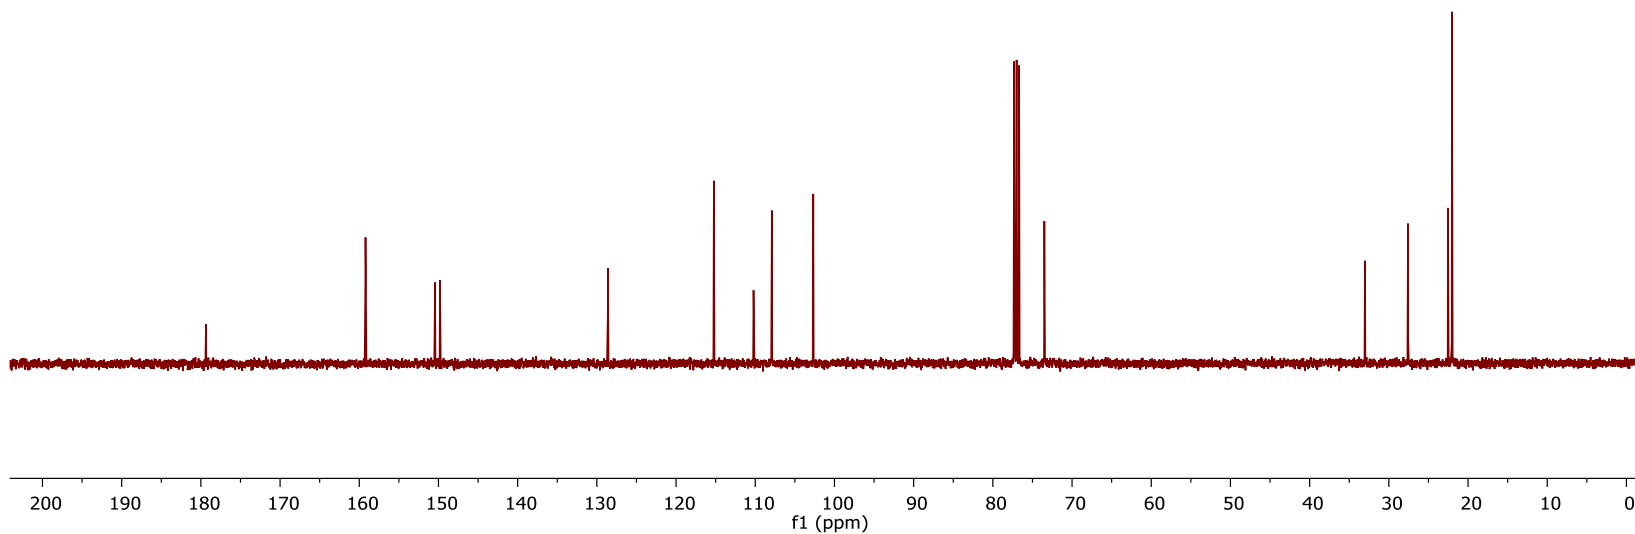

**<sup>1</sup>H NMR of (R)-4-benzyl-3-(4-(6-bromo-5-isopropoxybenzofuran-2-yl)butanoyl)oxazolidin-2-one (3b) (400 MHz, CDCl<sub>3</sub>)**

BS-MB-203  
01/07/2022

7.5952  
7.3335  
7.3165  
7.2979  
7.2779  
7.2603  
7.2510  
7.2421  
7.1895  
7.1721  
7.0213  
6.3504  
4.6641  
4.6554  
4.6465  
4.6391  
4.6310  
4.6230  
4.6147  
4.6059  
4.5069  
4.4918  
4.4766  
4.4615  
4.4463  
4.4311  
4.4161  
4.1919  
4.1691  
4.1592  
4.1509  
4.1367  
4.1276  
3.2834  
3.2749  
3.2499  
3.2416  
3.1007  
3.0824  
3.0570  
3.0379  
3.0181  
2.9994  
2.9738  
2.9557  
2.8546  
2.8361  
2.8178  
2.7715  
2.7475  
2.7381  
2.7141  
2.1691  
2.1508  
2.1325  
2.1144  
2.0969  
1.3751  
1.3600

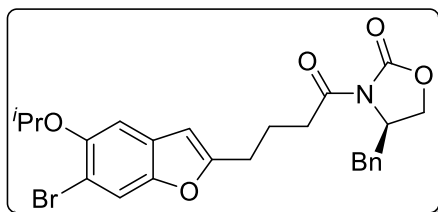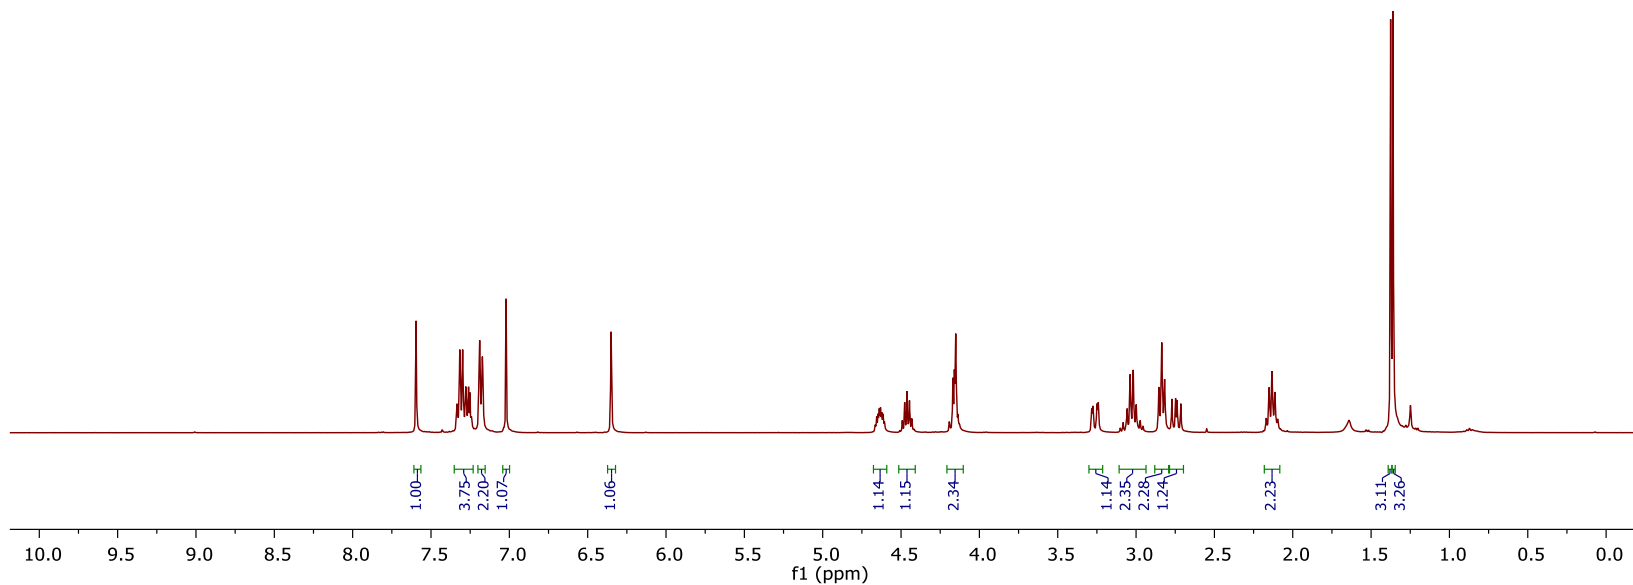

**<sup>13</sup>C NMR of (R)-4-benzyl-3-(4-(6-bromo-5-isopropoxybenzofuran-2-yl)butanoyl)oxazolidin-2-one (3b) (100 MHz, CDCl<sub>3</sub>)**

BS-MB-203  
01072022

— 172.49 — 159.54 — 153.39 — 150.37 — 149.77  
— 135.13 — 129.32 — 128.91 — 127.32 — 115.18 — 110.09 — 107.84 — 102.50  
— 77.32 — 77.00 — 76.68 — 73.43 — 66.20 — 55.06 — 37.83 — 34.67 — 27.67 — 22.04 — 22.01

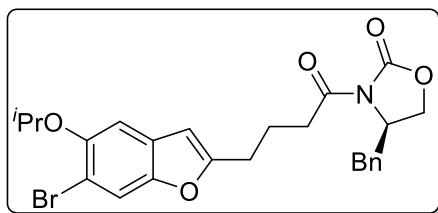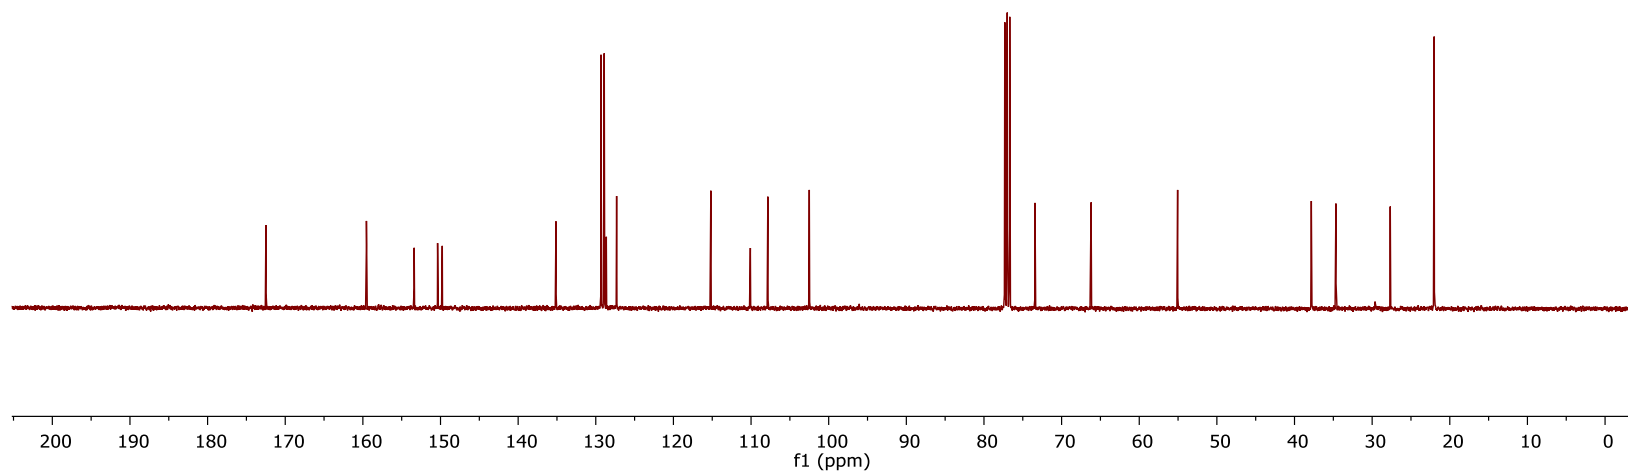

<sup>1</sup>H NMR of (R)-4-benzyl-3-((R)-4-(6-bromo-5-isopropoxybenzofuran-2-yl)-2-((R)-hydroxy(4-isopropoxy-3-methoxyphenyl)methyl)butanoyl)oxazolidin-2-one (12) (400 MHz, CDCl<sub>3</sub>)

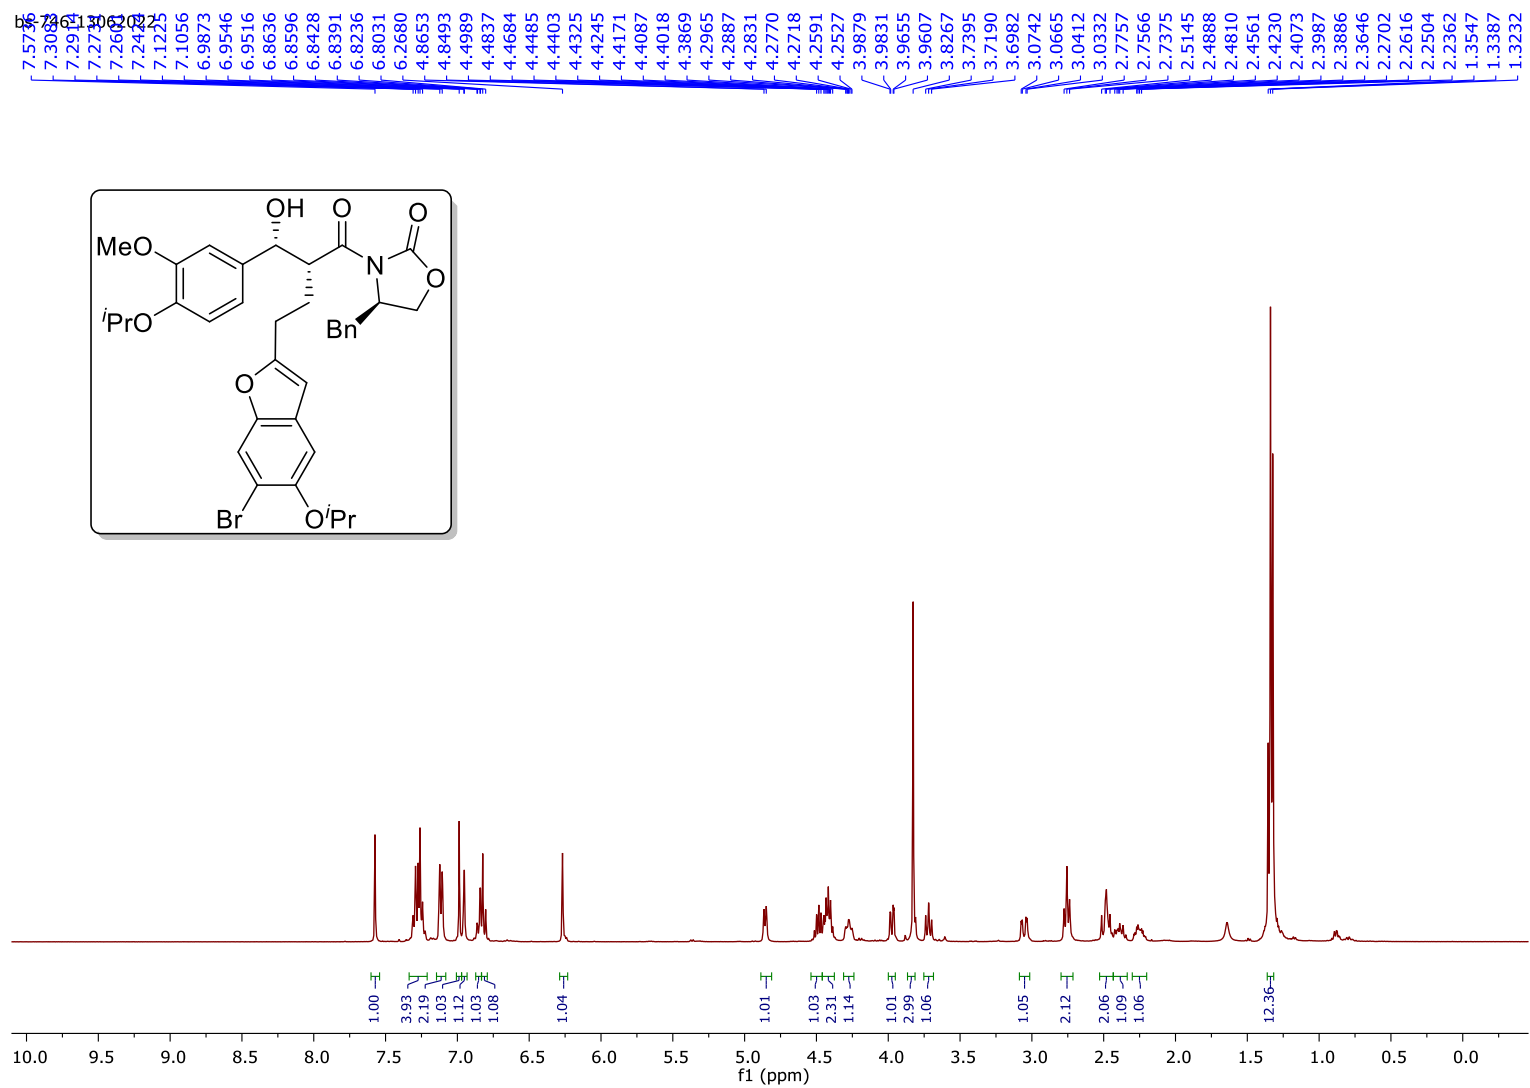

<sup>13</sup>C NMR of (R)-4-benzyl-3-((R)-4-(6-bromo-5-isopropoxybenzofuran-2-yl)-2-((R)-hydroxy(4-isopropoxy-3-methoxyphenyl)methyl)butanoyl)oxazolidin-2-one (12) (100 MHz, CDCl<sub>3</sub>)

BS-746  
13062022

174.22  
159.55  
153.02  
150.37  
150.17  
149.71  
146.80  
135.03  
134.20  
129.21  
128.88  
128.63  
127.30  
118.35  
115.18  
110.03  
109.71  
107.71  
102.38  
77.32  
77.00  
76.68  
75.09  
73.40  
71.38  
65.98  
55.84  
55.69  
50.00  
37.84  
26.57  
25.82  
22.01  
21.99  
21.94

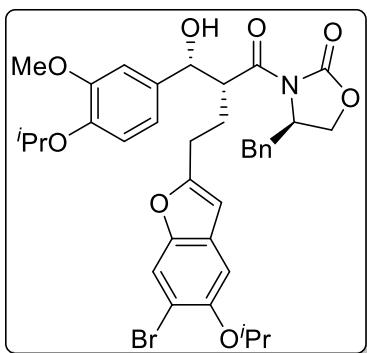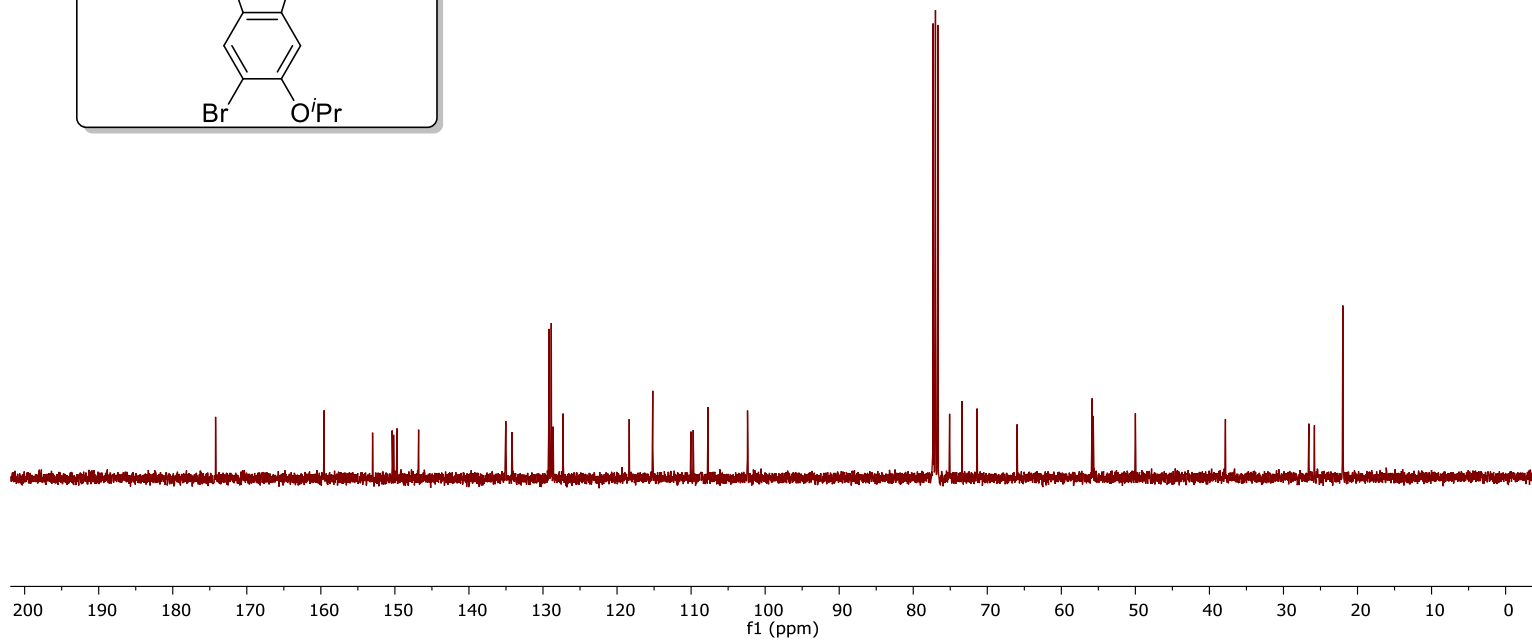

**<sup>1</sup>H NMR of 4-isopropoxy-3-methoxybenzaldehyde (4) (400 MHz, CDCl<sub>3</sub>)**

BS-MB-176  
iPr-VAN 06062022

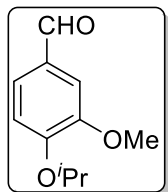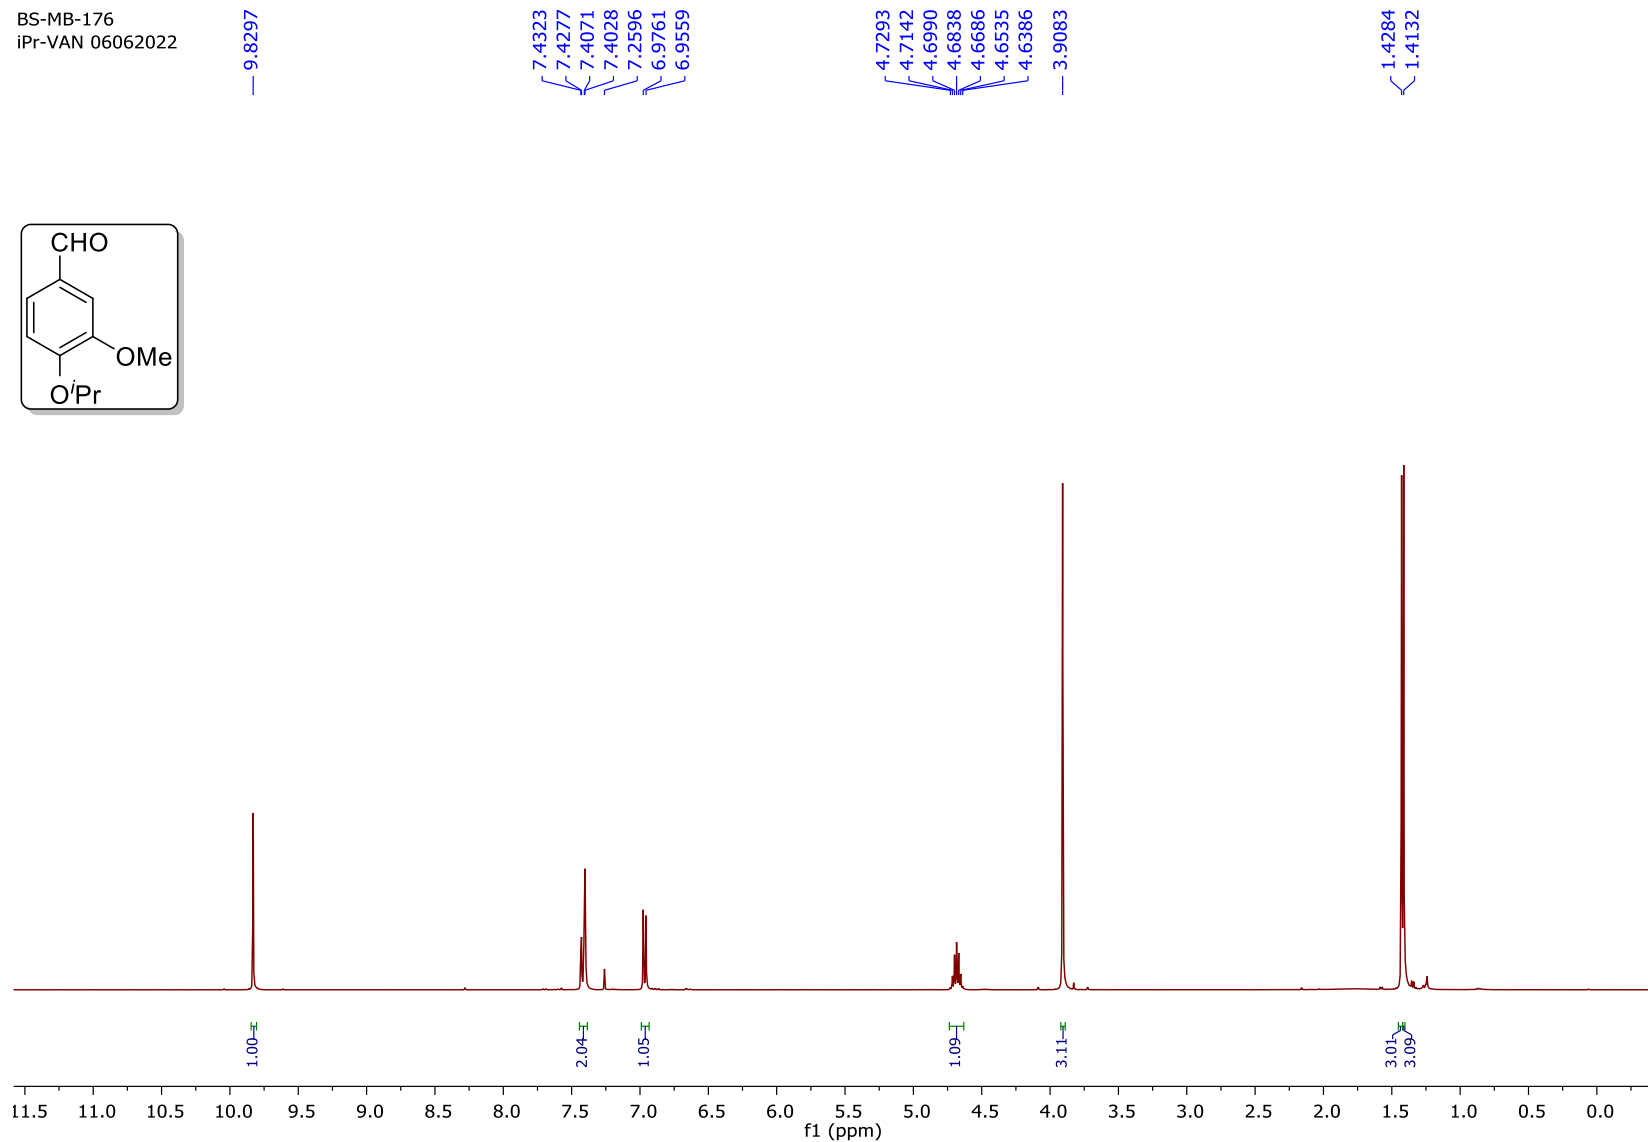



**<sup>13</sup>C NMR of 4-isopropoxy-3-methoxybenzaldehyde (4) (100 MHz, CDCl<sub>3</sub>)**

BS-MB-176  
iPr-VAN 06062022

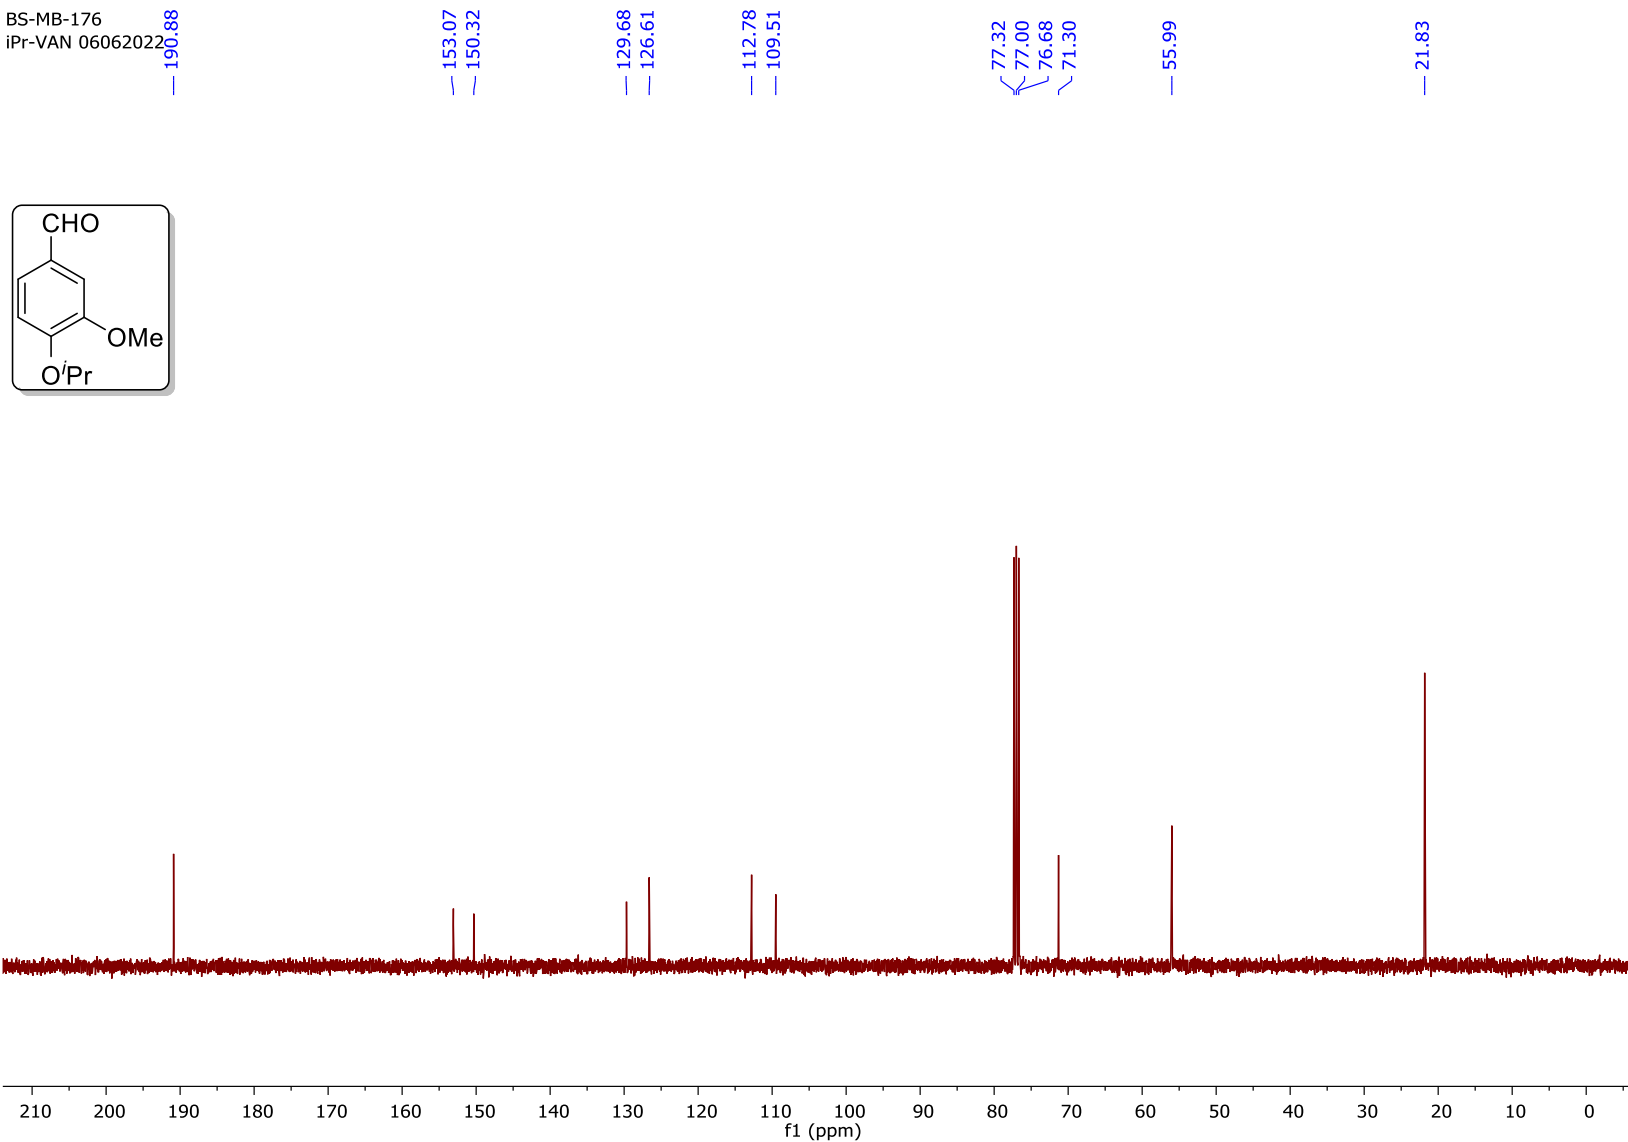

**<sup>1</sup>H NMR of (R)-4-benzyl-3-((1R,2R)-7-bromo-8-isopropoxy-1-(4-isopropoxy-3-methoxyphenyl)-1,2,3,4-tetrahydrodibenzo[*b,d*]furan-2-carbonyl)oxazolidin-2-one (13) (400 MHz, CDCl<sub>3</sub>)**

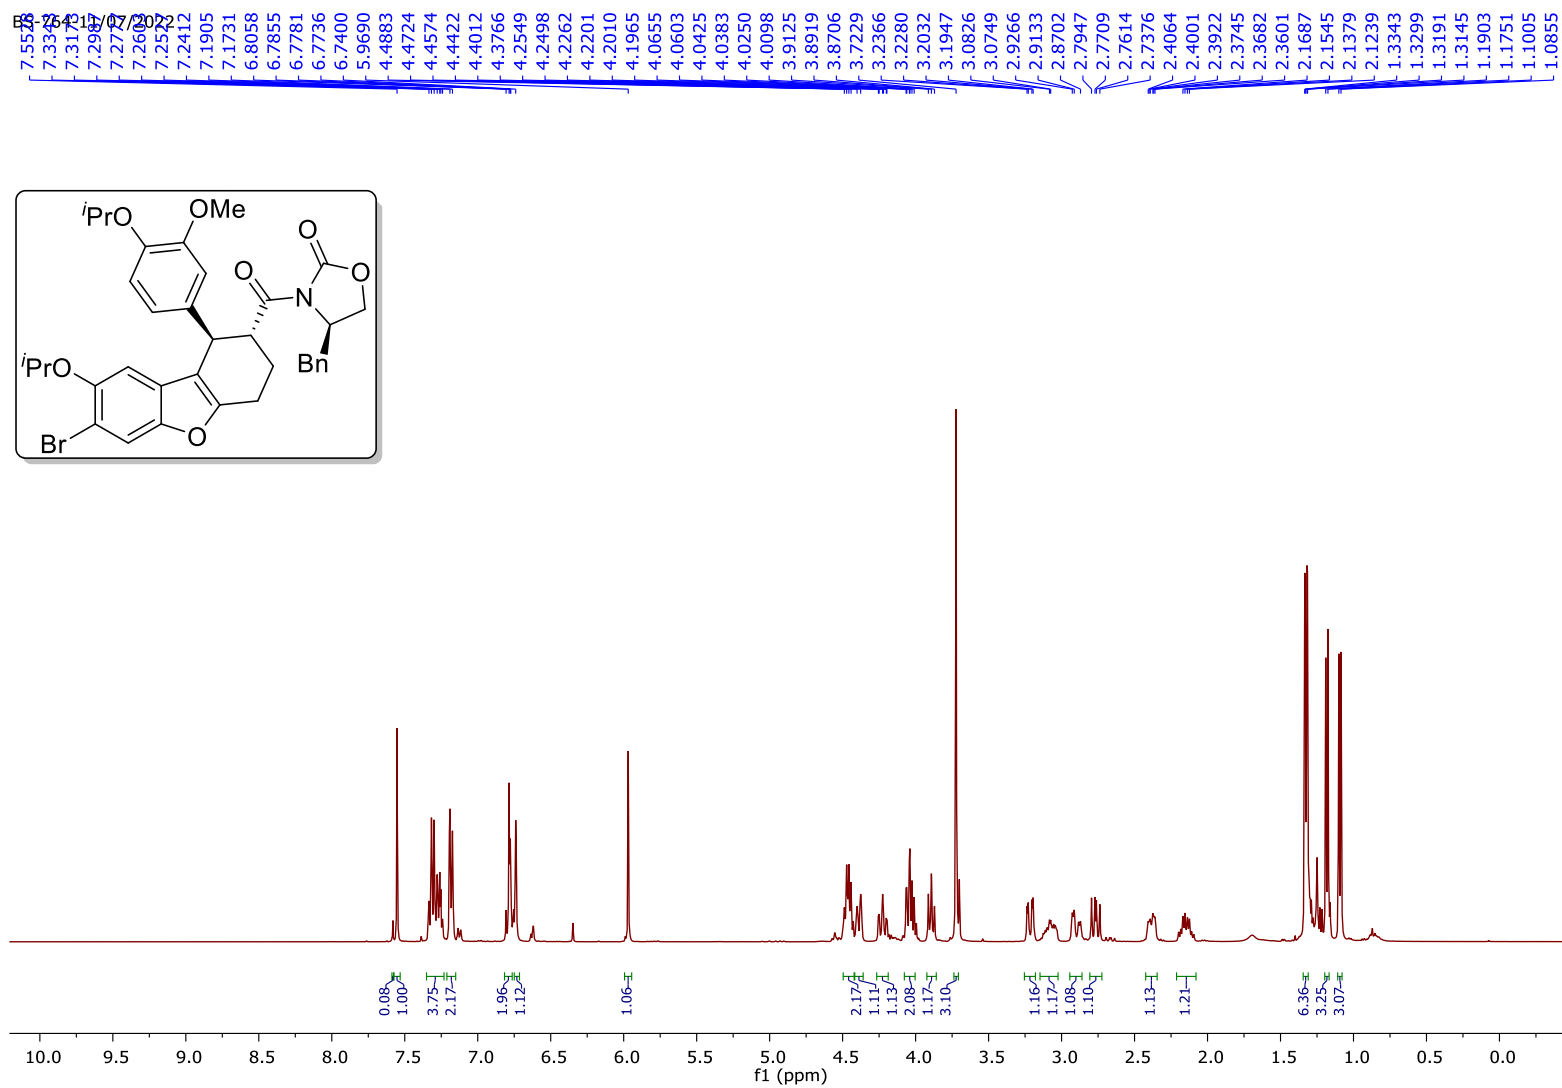

**$^{13}\text{C}$  NMR of (*R*)-4-benzyl-3-((1*R*,2*R*)-7-bromo-8-isopropoxy-1-(4-isopropoxy-3-methoxyphenyl)-1,2,3,4-tetrahydrodibenzo[*b,d*]furan-2-carbonyl)oxazolidin-2-one (13) (100 MHz,  $\text{CDCl}_3$ )**

BS-764-11/07/2022

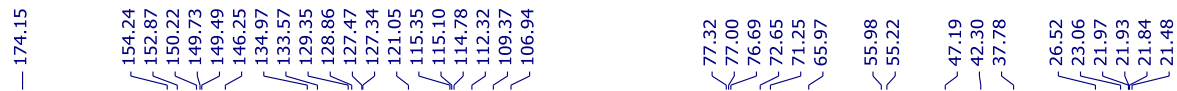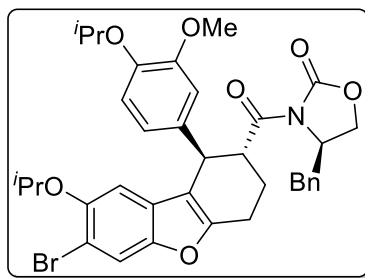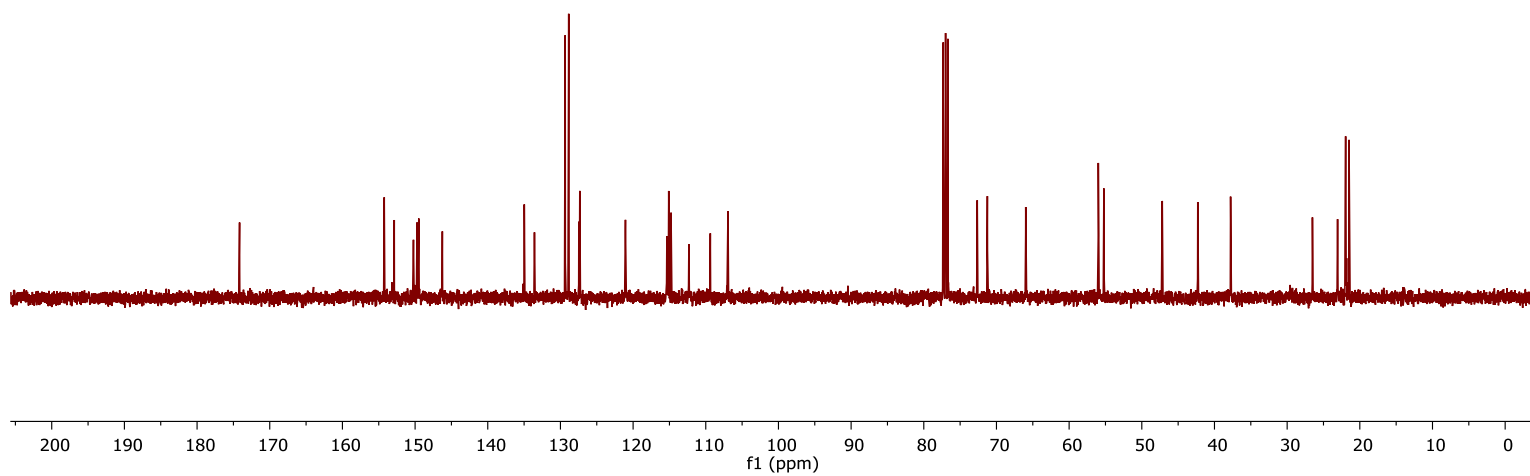

**<sup>1</sup>H NMR of ((1*R*,2*R*)-7-bromo-8-isopropoxy-1-(4-isopropoxy-3-methoxyphenyl)-1,2,3,4-tetrahydrodibenzo[*b,d*]furan-2-yl)methanol (2')**  
(400 MHz, CDCl<sub>3</sub>)

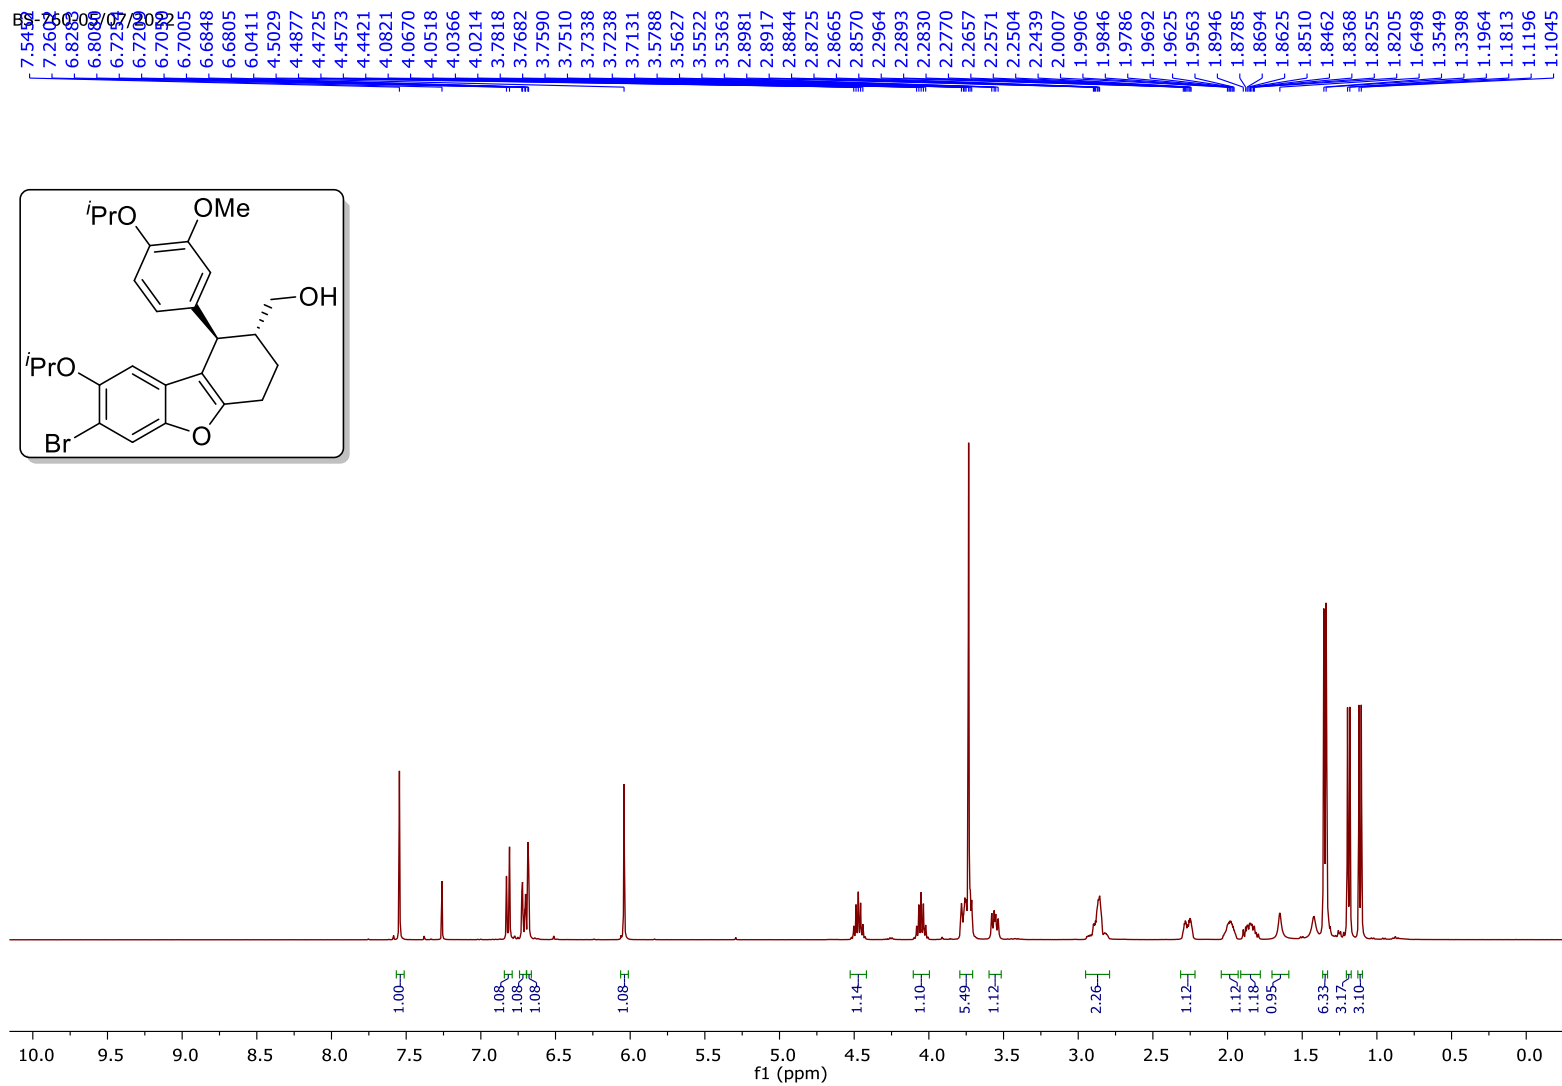

**<sup>13</sup>C NMR of ((1*R*,2*R*)-7-bromo-8-isopropoxy-1-(4-isopropoxy-3-methoxyphenyl)-1,2,3,4-tetrahydrobenzo[*b,d*]furan-2-yl)methanol (2')**  
(100 MHz, CDCl<sub>3</sub>)

BS-760-05/07/2022

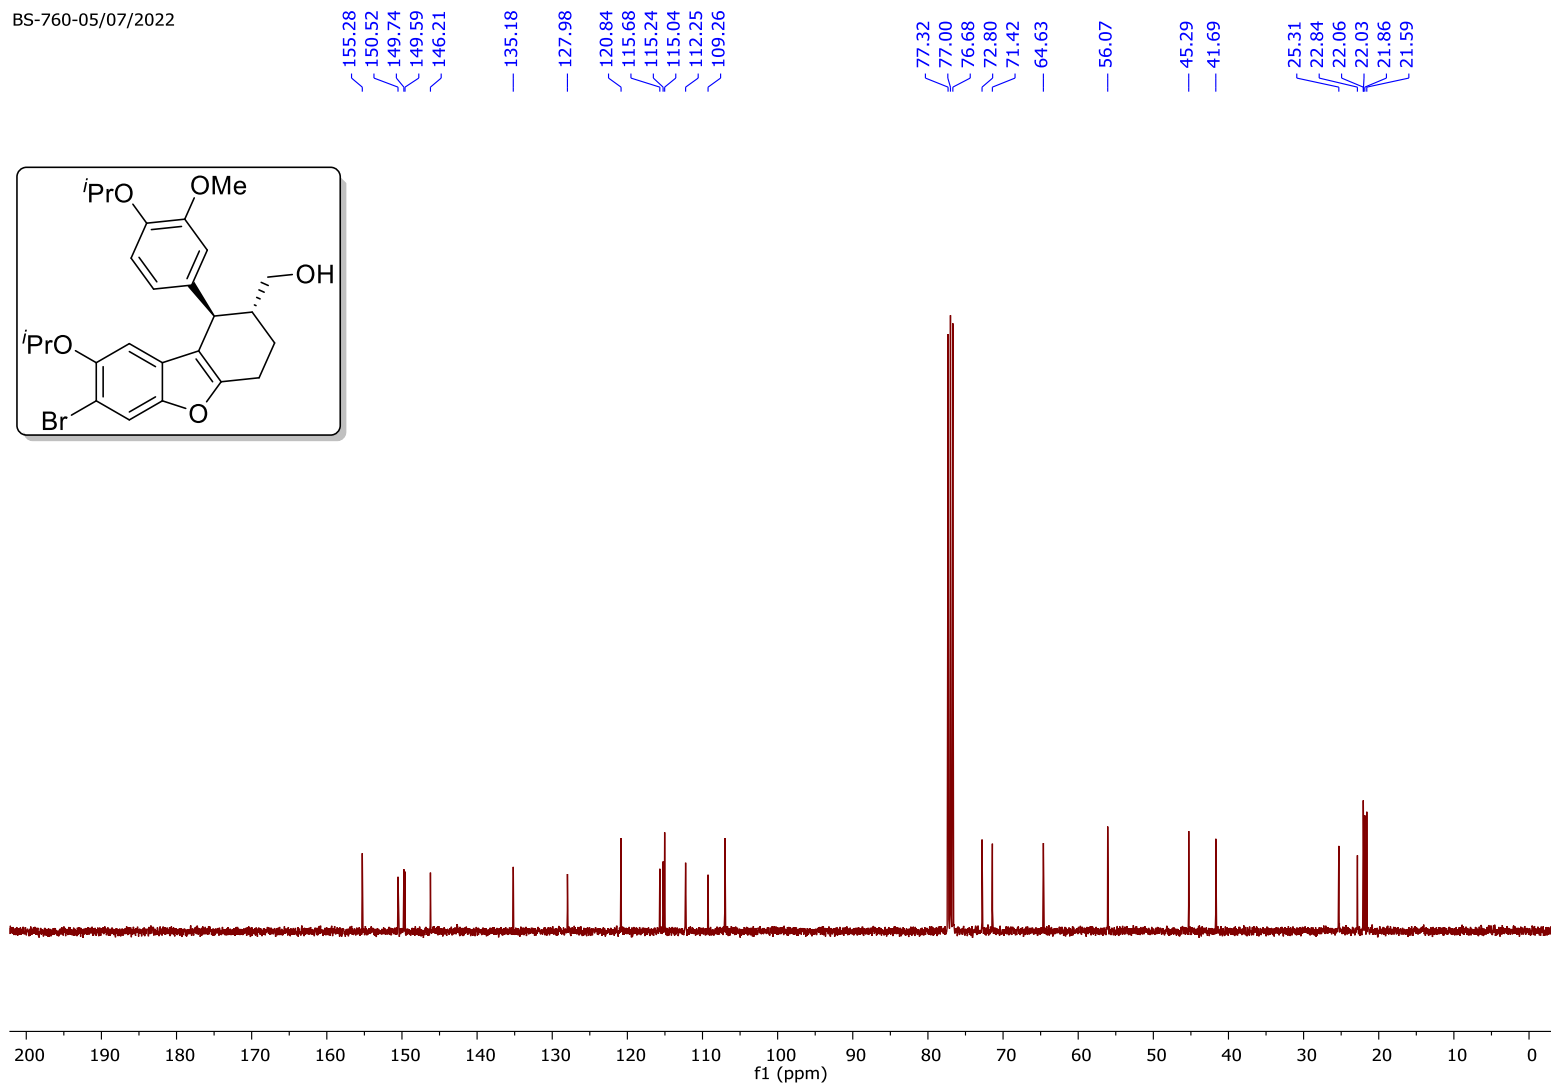

**<sup>1</sup>H NMR of ((1*R*,2*R*)-7-bromo-8-isopropoxy-1-(4-isopropoxy-3-methoxyphenyl)-1,2,3,4-tetrahydrodibenzo[*b,d*]furan-2-yl)methyl acetate (2) (400 MHz, CDCl<sub>3</sub>)**

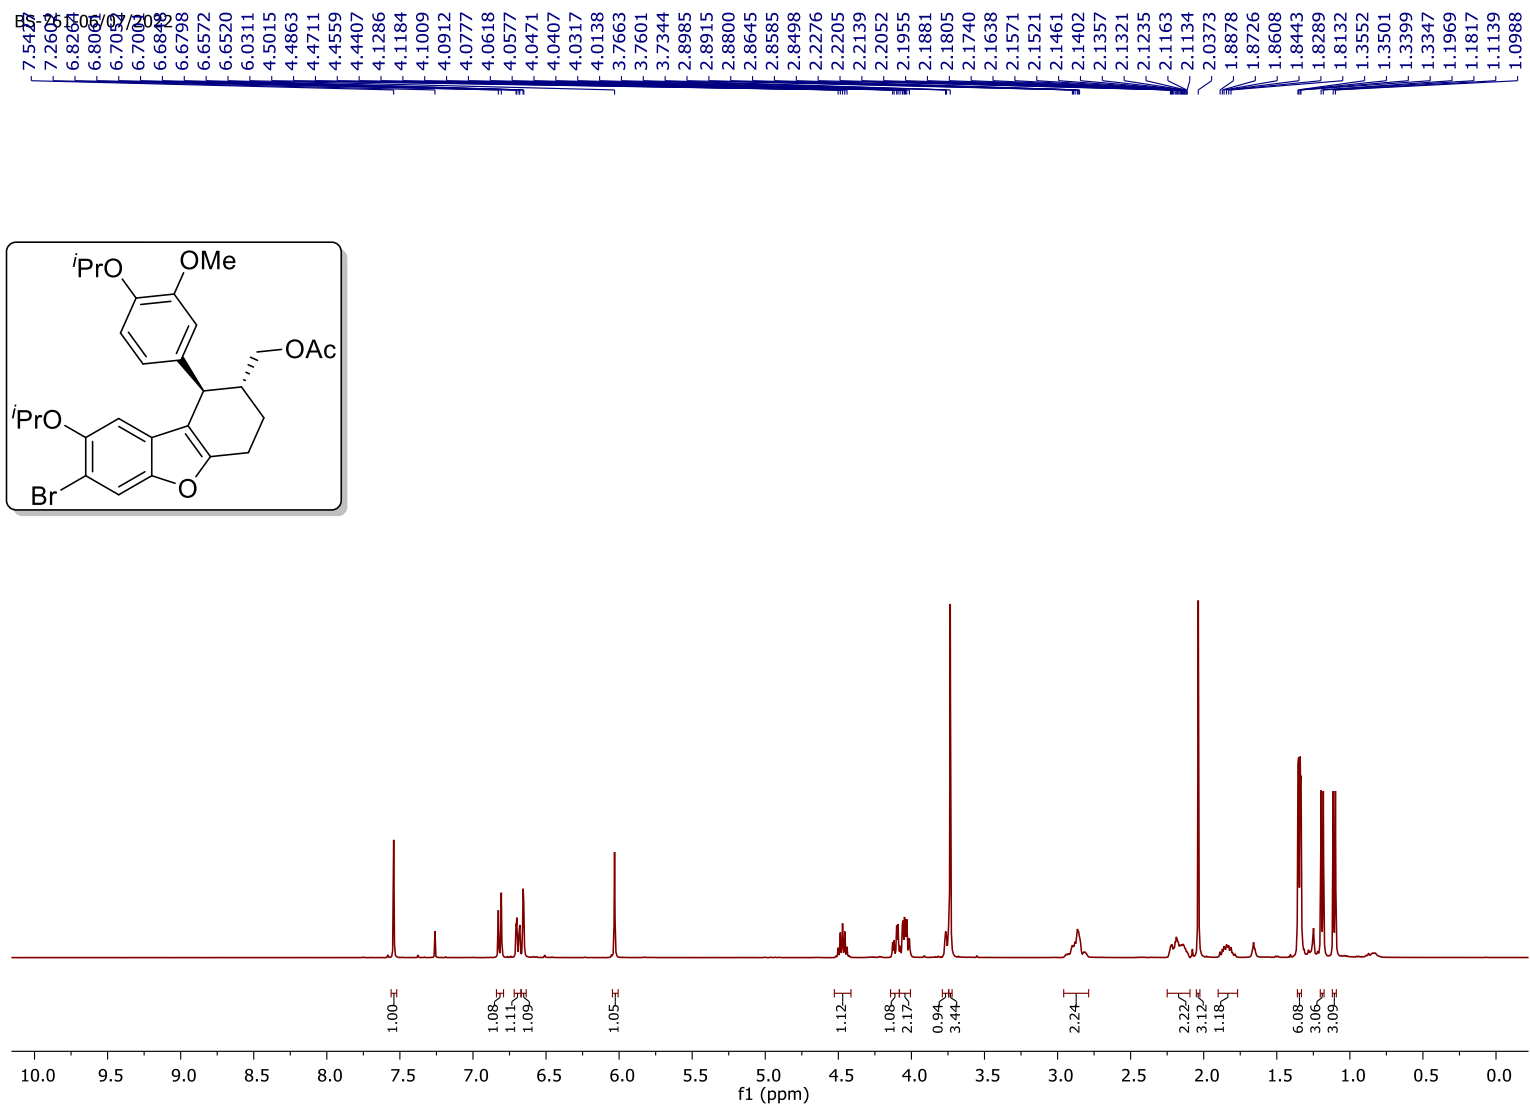

**$^{13}\text{C}$  NMR of ((1*R*,2*R*)-7-bromo-8-isopropoxy-1-(4-isopropoxy-3-methoxyphenyl)-1,2,3,4-tetrahydrodibenzo[*b,d*]furan-2-yl)methyl acetate (2) (100 MHz,  $\text{CDCl}_3$ )**

BS-761-06/07/2022

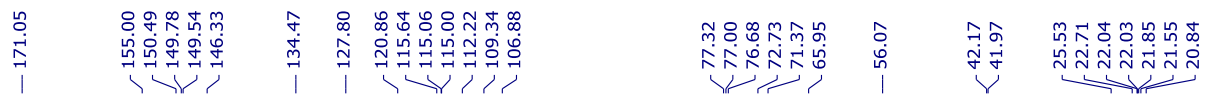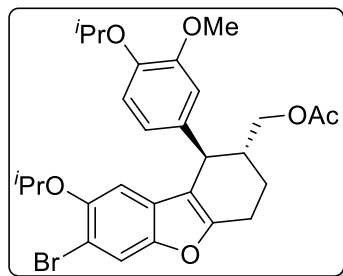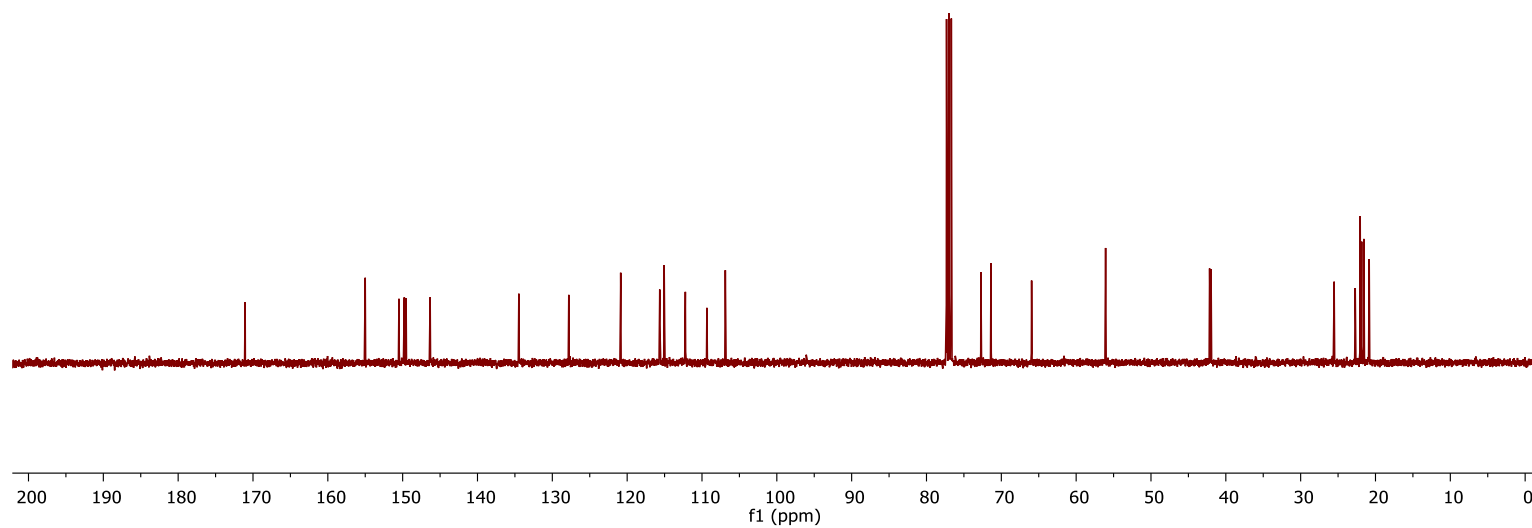

NOESY spectra of ((1*R*,2*R*)-7-bromo-8-isopropoxy-1-(4-isopropoxy-3-methoxyphenyl)-1,2,3,4-tetrahydrodibenzo[*b,d*]furan-2-yl)methyl acetate (2) (400 MHz, Benzene-*d*<sub>6</sub>)

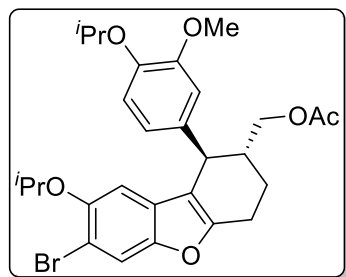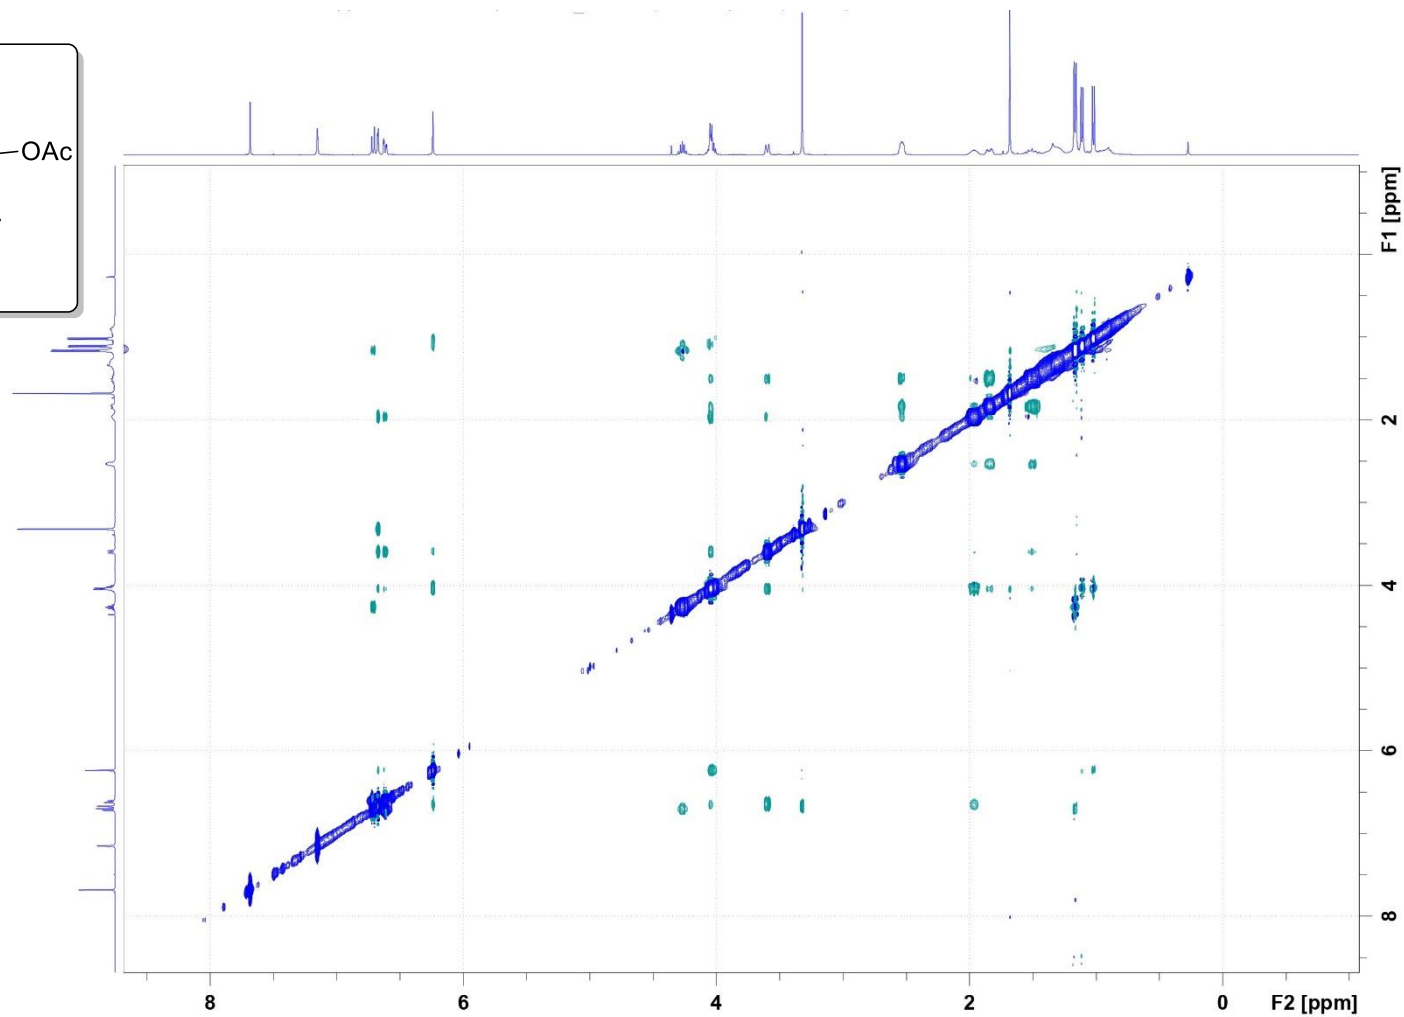



**NOESY spectra of ((1*R*,2*R*)-7-bromo-8-isopropoxy-1-(4-isopropoxy-3-methoxyphenyl)-1,2,3,4-tetrahydrodibenzo[*b,d*]furan-2-yl)methyl acetate (2) (400 MHz, Benzene-*d*<sub>6</sub>)**

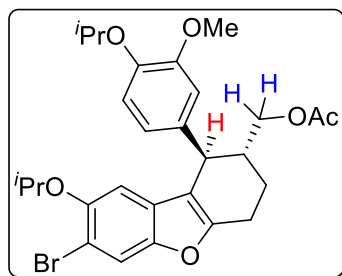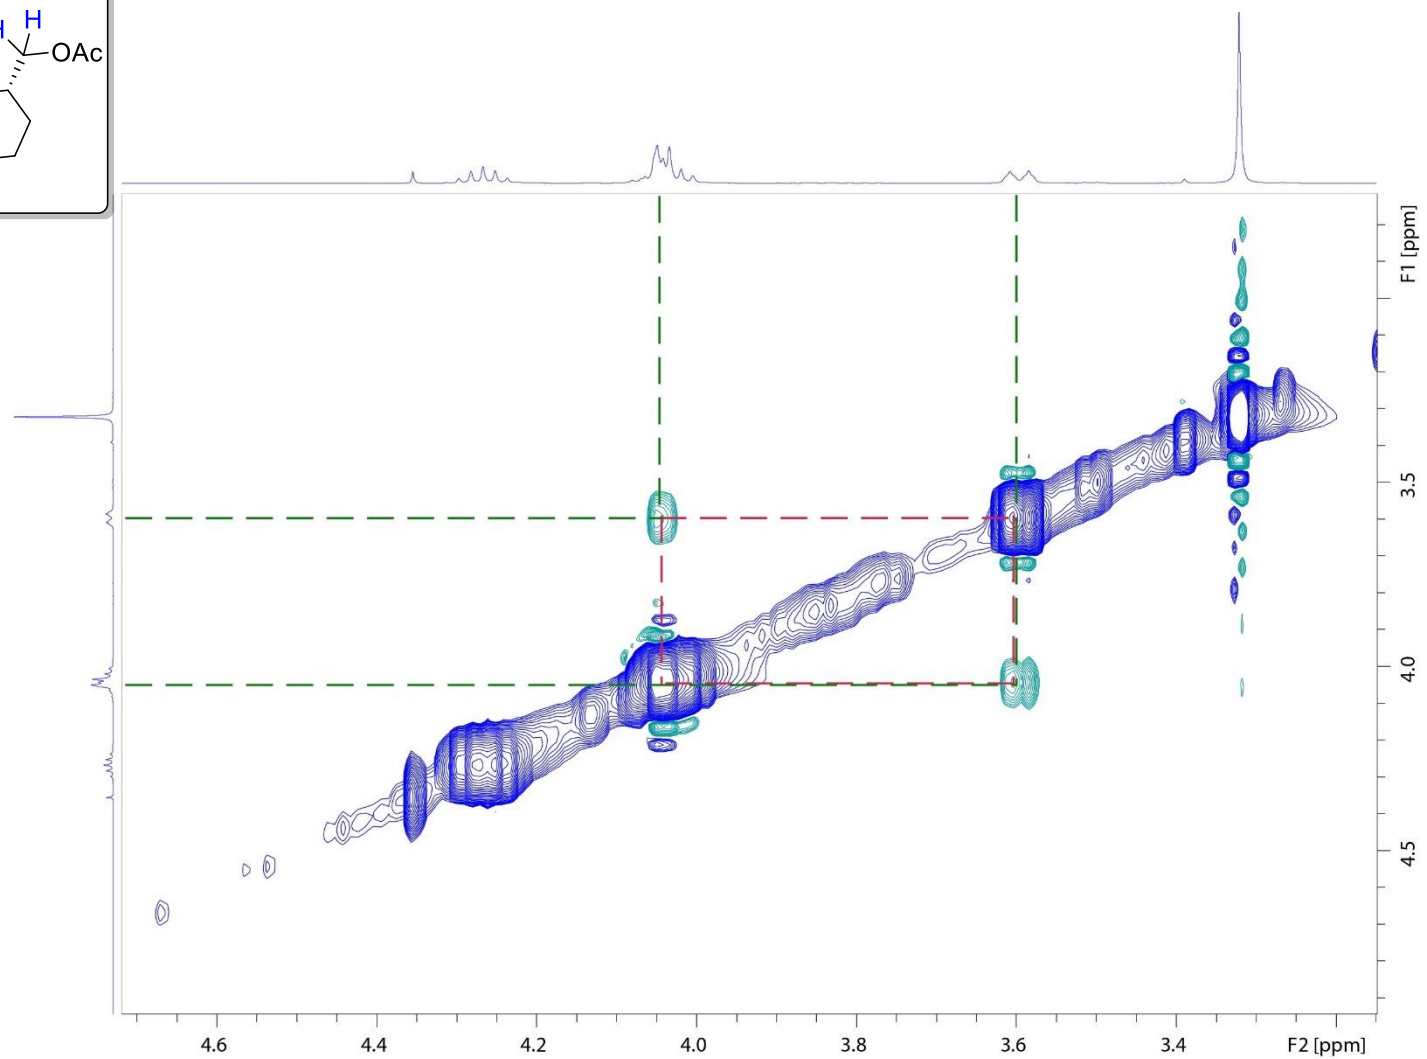

**<sup>1</sup>H NMR of (1*R*,2*S*)-2-(2-(6-bromo-5-isopropoxybenzofuran-2-yl)ethyl)-1-(4-isopropoxy-3-methoxyphenyl)propane-1,3-diyl diacetate (12') (400 MHz, CDCl<sub>3</sub>)**

May29-2023 9:01  
 MB-344  
 29.05.2026

7.5763, 7.2605, 7.2188, 7.2013, 7.0116, 6.8392, 6.8186, 6.7923, 6.7880, 6.7673, 6.7515, 6.7476, 6.2197, 5.8188, 5.8014, 4.5361, 4.5210, 4.5059, 4.4911, 4.4788, 4.4637, 4.4485, 4.2279, 4.2047, 4.1847, 4.1762, 4.1619, 4.1480, 4.1335, 4.1195, 3.8556, 3.8436, 3.8270, 3.8092, 2.8436, 2.8287, 2.8211, 2.8055, 2.7903, 2.7818, 2.7691, 2.7327, 2.7124, 2.6932, 2.6734, 2.6540, 2.1720, 2.1073, 2.0402, 1.9856, 1.9623, 1.9520, 1.9441, 1.8208, 1.8061, 1.7988, 1.7850, 1.7635, 1.3921, 1.3768, 1.3688, 1.3535

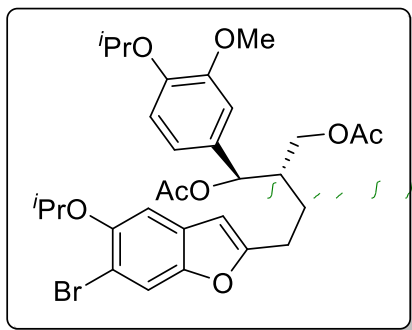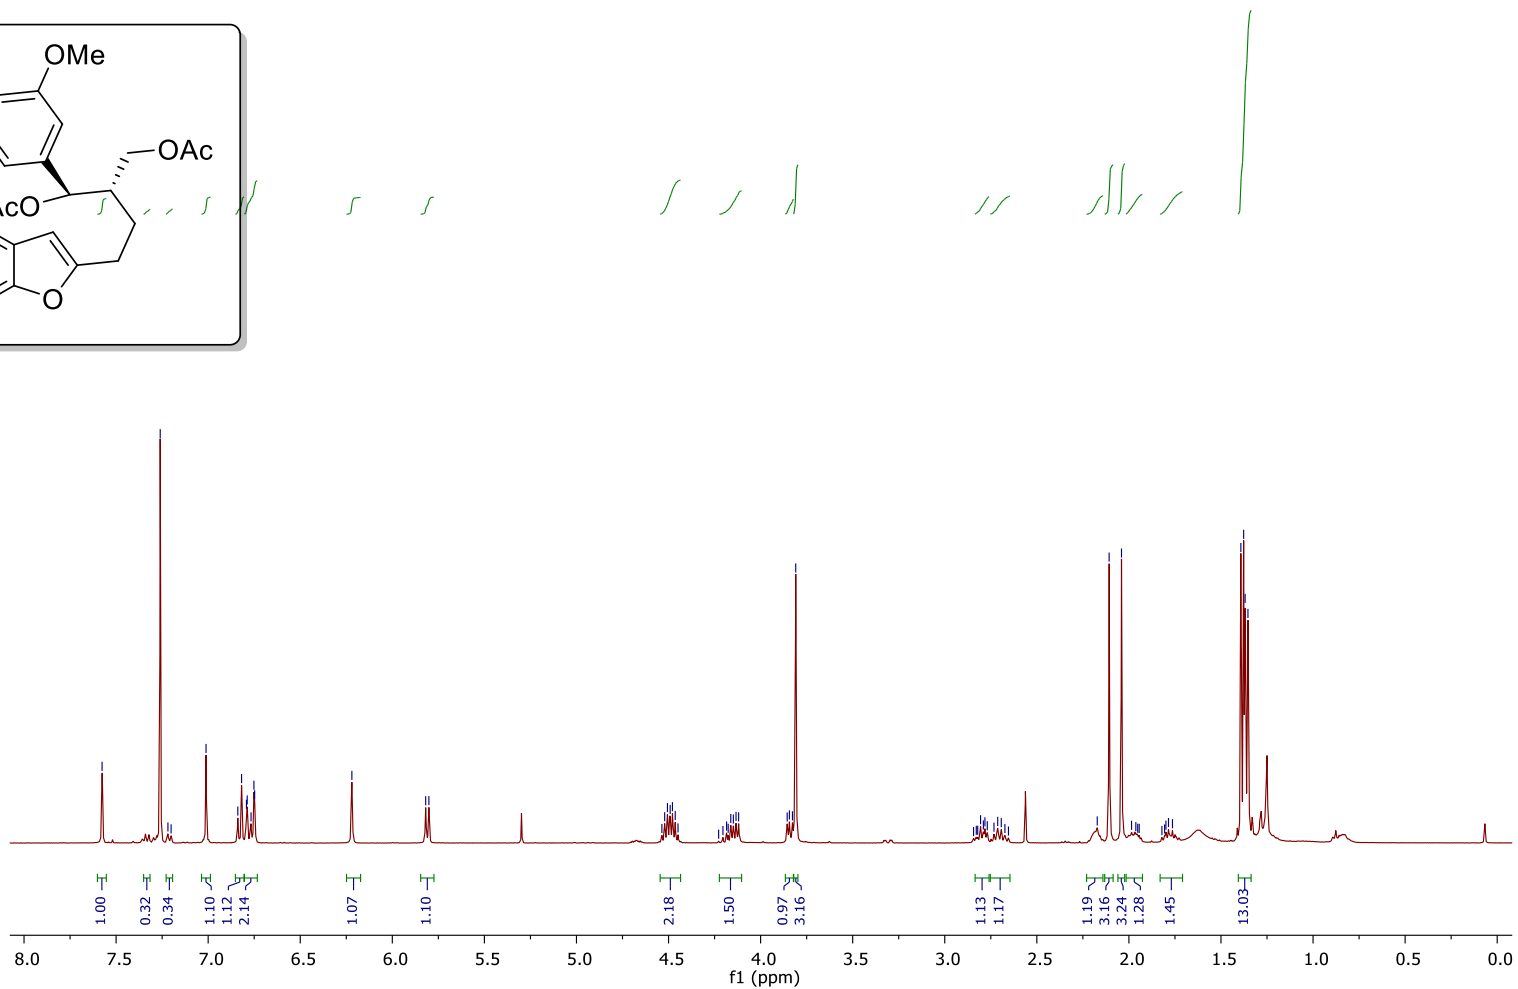

**<sup>13</sup>C NMR of (1*R*,2*S*)-2-(2-(6-bromo-5-isopropoxybenzofuran-2-yl)ethyl)-1-(4-isopropoxy-3-methoxyphenyl)propane-1,3-diyl diacetate (12')** (100 MHz, CDCl<sub>3</sub>)

May29-2023.91.fid  
MB-344  
29.05.2023

170.92  
170.14  
159.66  
150.42  
150.18  
149.72  
147.12  
131.14  
129.40  
128.96  
128.58  
127.36  
118.91  
115.18  
115.04  
110.27  
110.12  
107.77  
102.29  
77.32  
77.00  
76.68  
75.48  
73.46  
71.26  
66.08  
63.26  
55.97  
54.97  
42.40  
37.79  
29.68  
26.10  
24.96  
22.08  
22.05  
21.21  
20.87

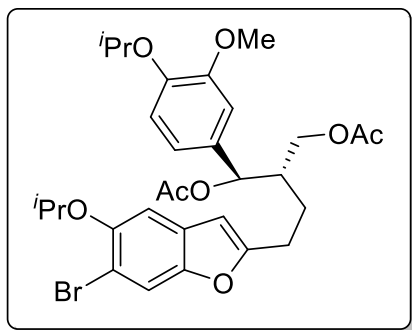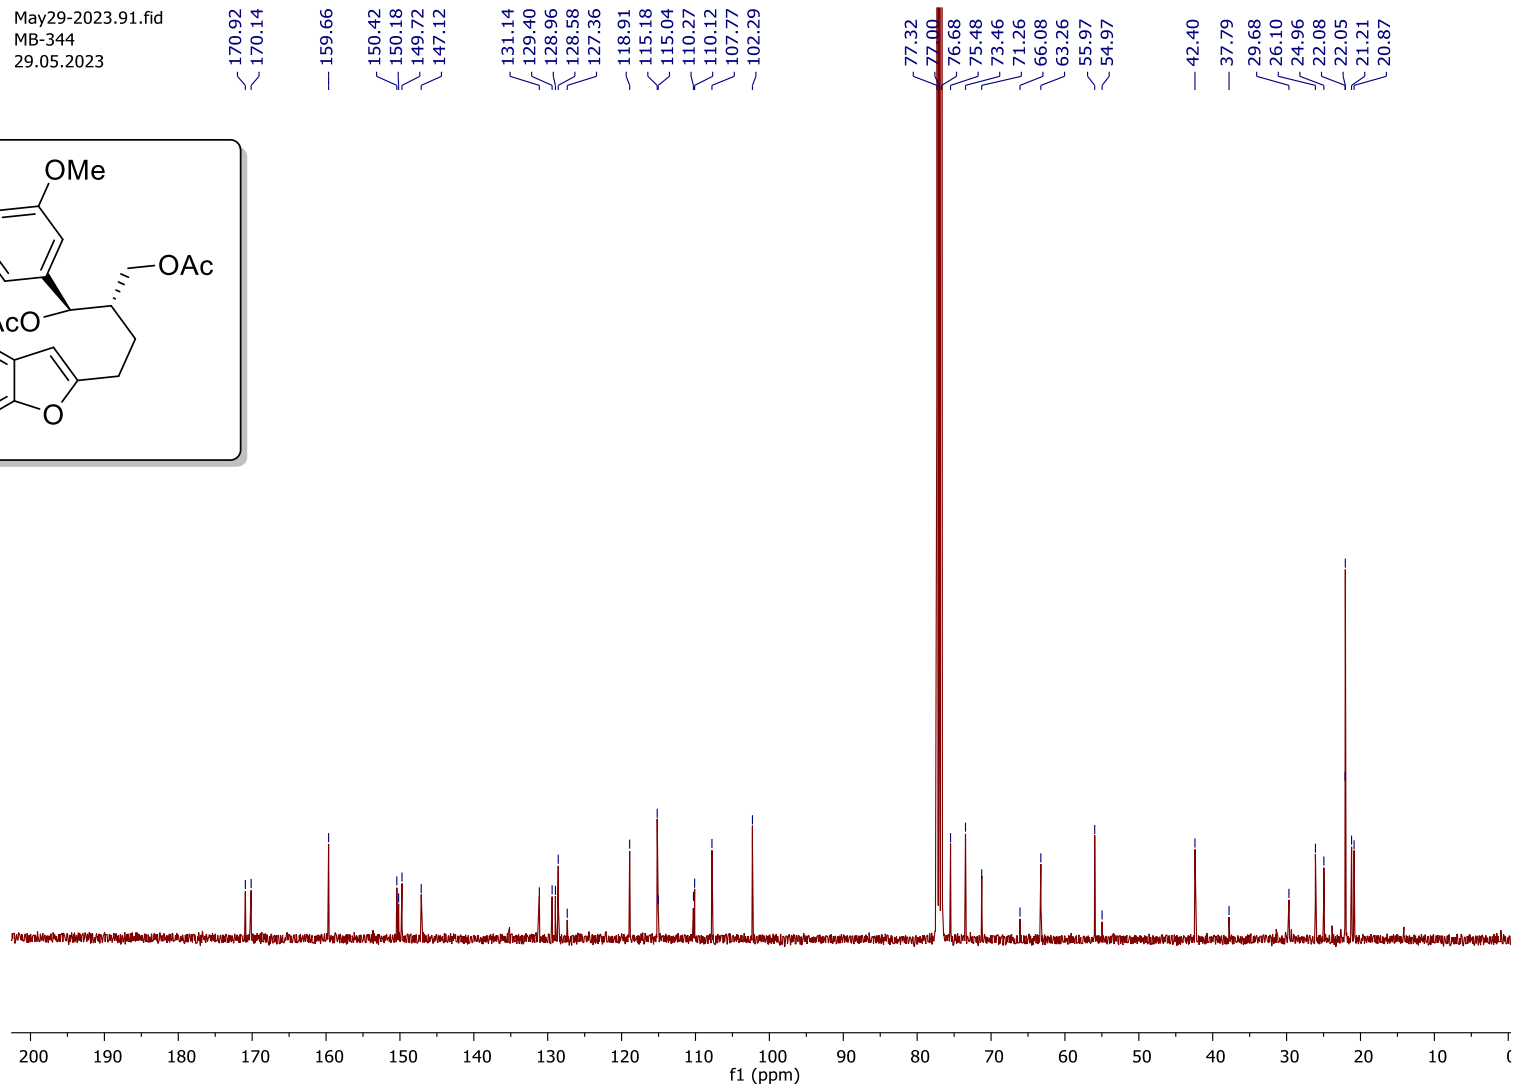

**<sup>1</sup>H NMR of ((1*R*,2*R*)-7-acetyl-8-isopropoxy-1-(4-isopropoxy-3-methoxyphenyl)-1,2,3,4-tetrahydrodibenzo[*b,d*]furan-2-yl)methyl acetate (14) (800 MHz, CDCl<sub>3</sub>)**

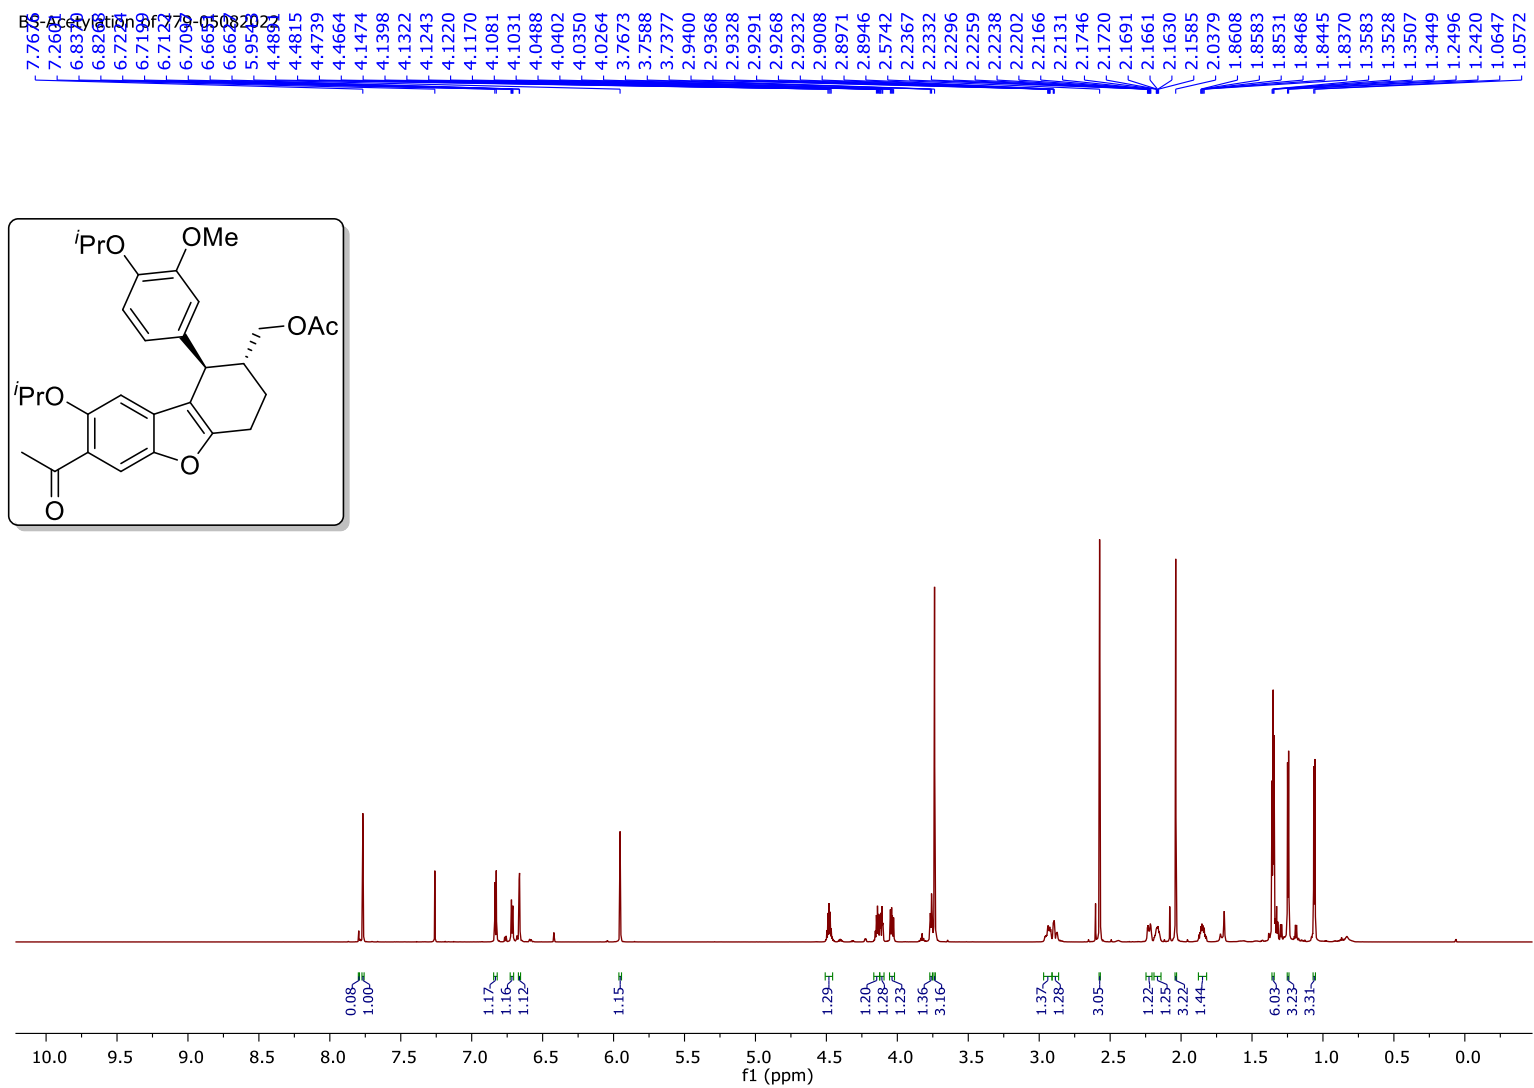

**<sup>13</sup>C NMR of ((1*R*,2*R*)-7-acetyl-8-isopropoxy-1-(4-isopropoxy-3-methoxyphenyl)-1,2,3,4-tetrahydrodibenzo[*b,d*]furan-2-yl)methyl acetate (14) (200 MHz, CDCl<sub>3</sub>)**

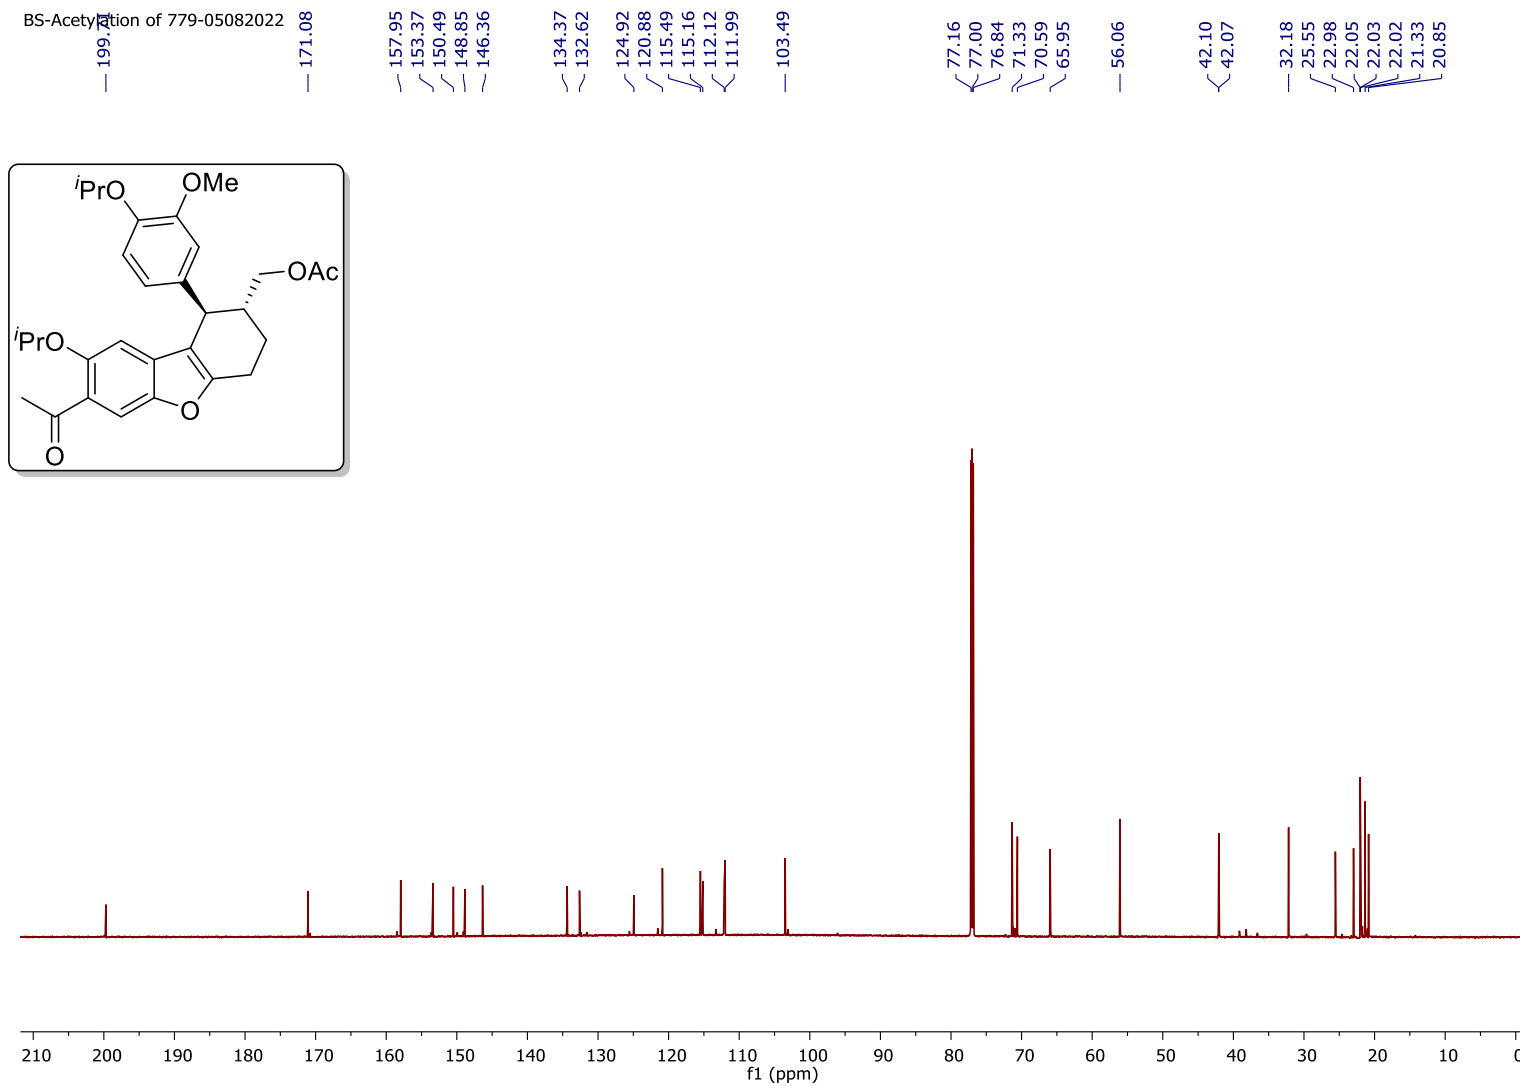

# <sup>1</sup>H NMR of (+)-propolisbenzofuran B (1) (400 MHz, Acetone-d<sub>6</sub>)

Aug20-2022.11.fid  
BS-propolisbenzofuran B-20082022  
acetone-d6

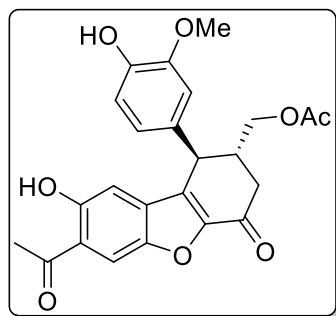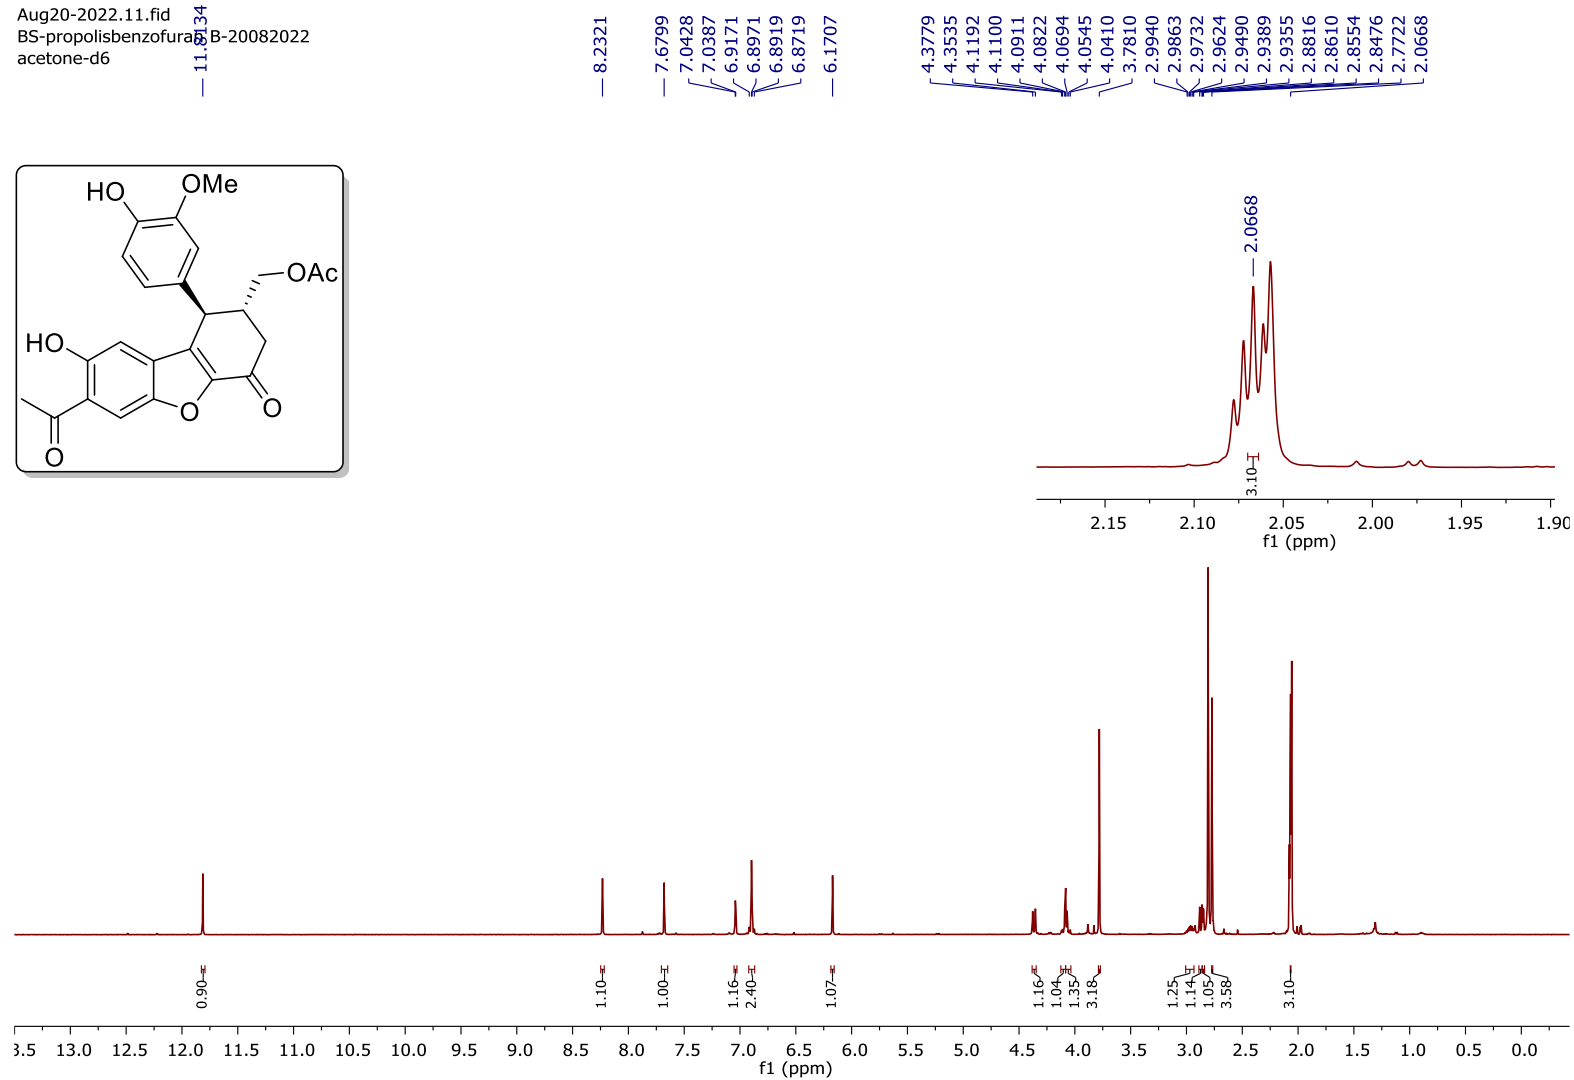

**<sup>13</sup>C NMR of (+)-propolisbenzofuran B (1) (100 MHz, Acetone-*d*<sub>6</sub>)**

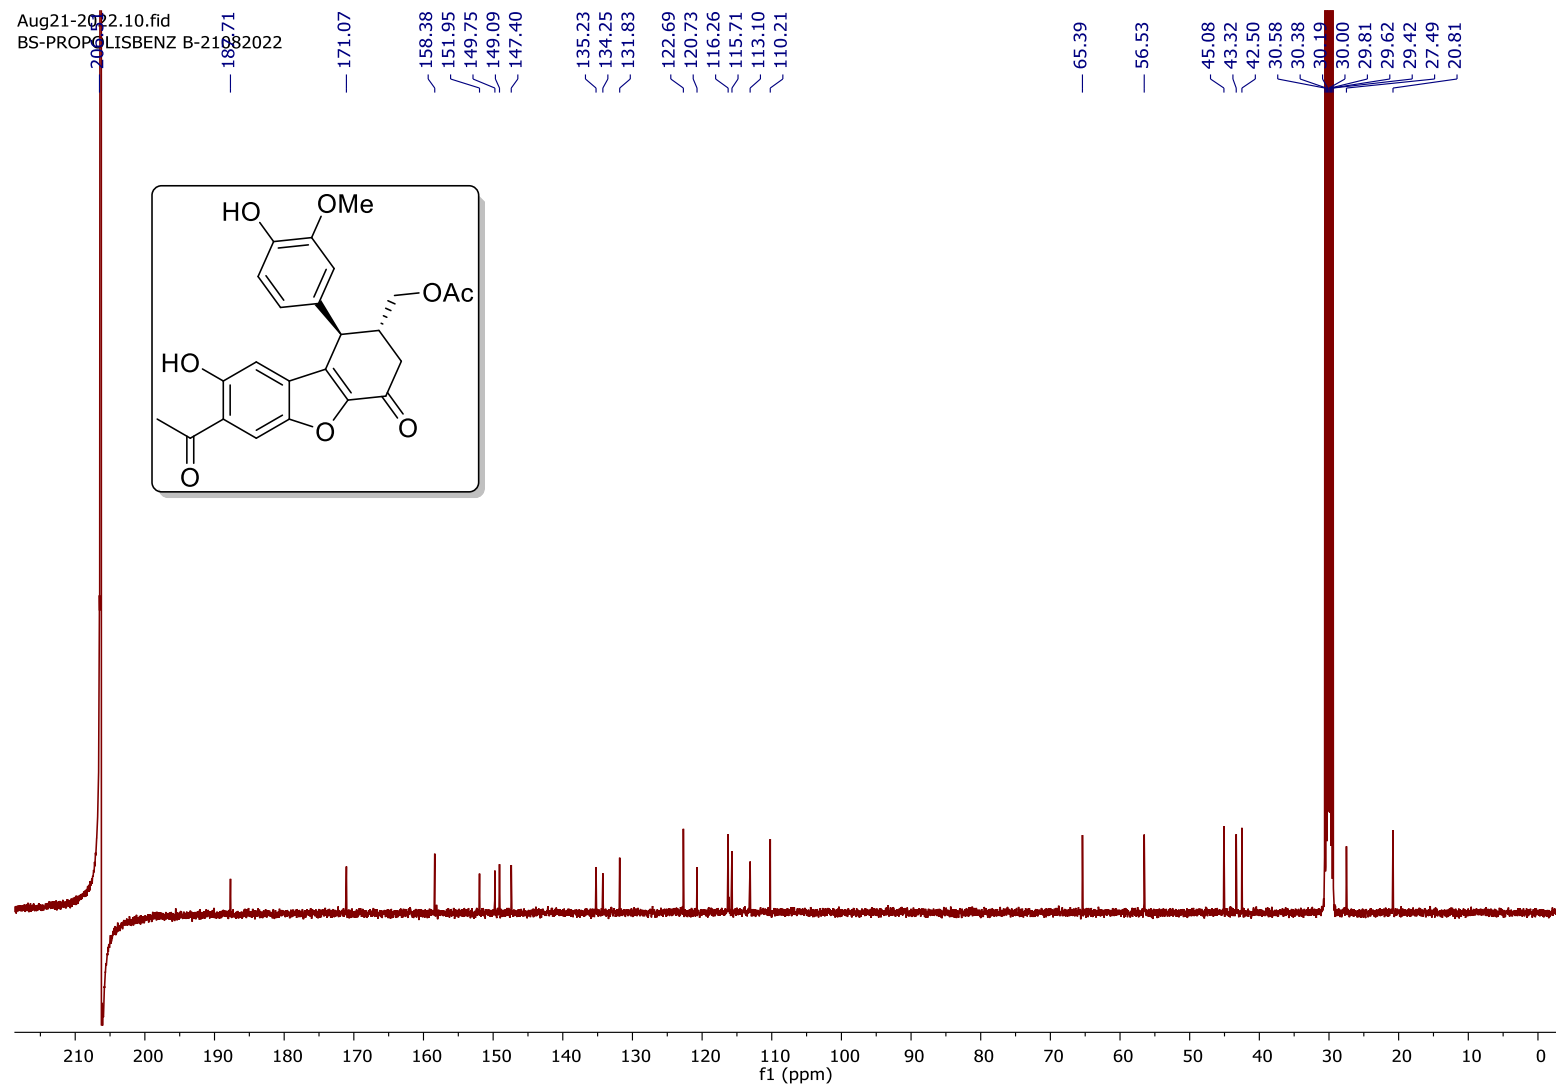

# <sup>1</sup>H NMR of (+)-propolisbenzofuran B (1) (400 MHz, CDCl<sub>3</sub>)

Aug19-2022.30.fid  
BS-propolisbenz B-19082022

11.8997

7.9291  
7.2595  
6.9275  
6.9073  
6.7391  
6.7340  
6.7189  
6.7138  
6.6373  
6.6322  
6.2575  
5.6530  
4.1875  
4.1632  
4.0801  
4.0713  
4.0490  
4.0430  
4.0378  
4.0200  
4.0107  
4.0084  
3.8016  
2.9296  
2.8982  
2.8007  
2.7979  
2.7752  
2.7684  
2.7609  
2.6932  
2.0777

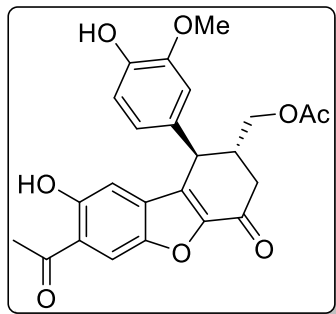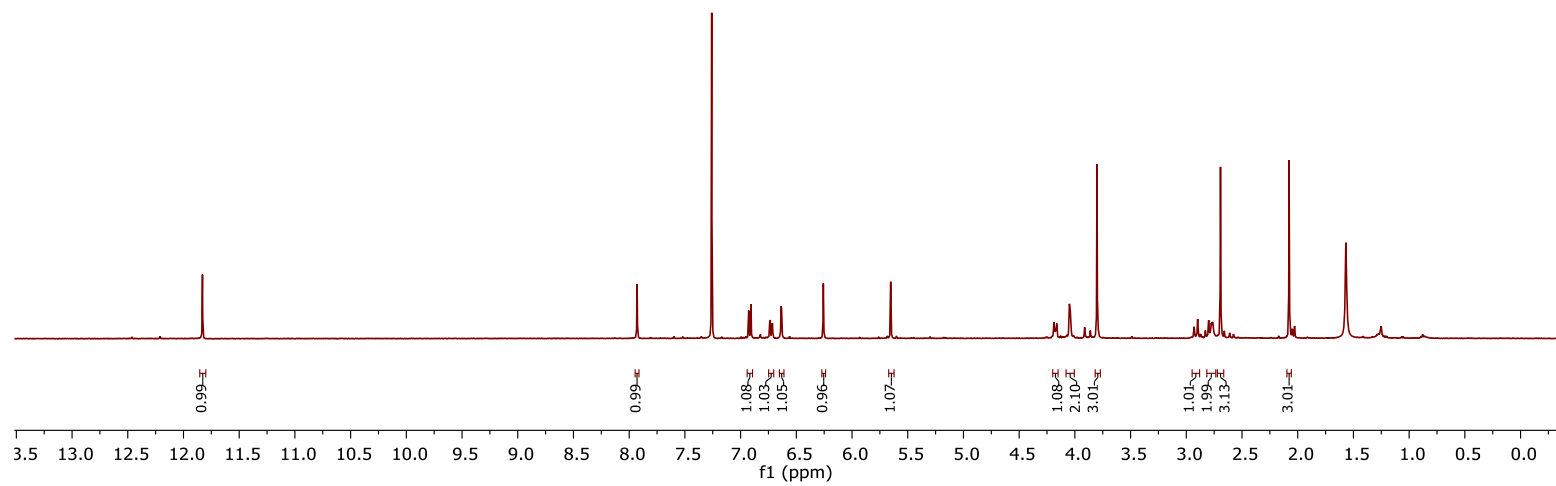



# <sup>13</sup>C NMR of (+)-propolisbenzofuran B (1) (100 MHz, CDCl<sub>3</sub>)

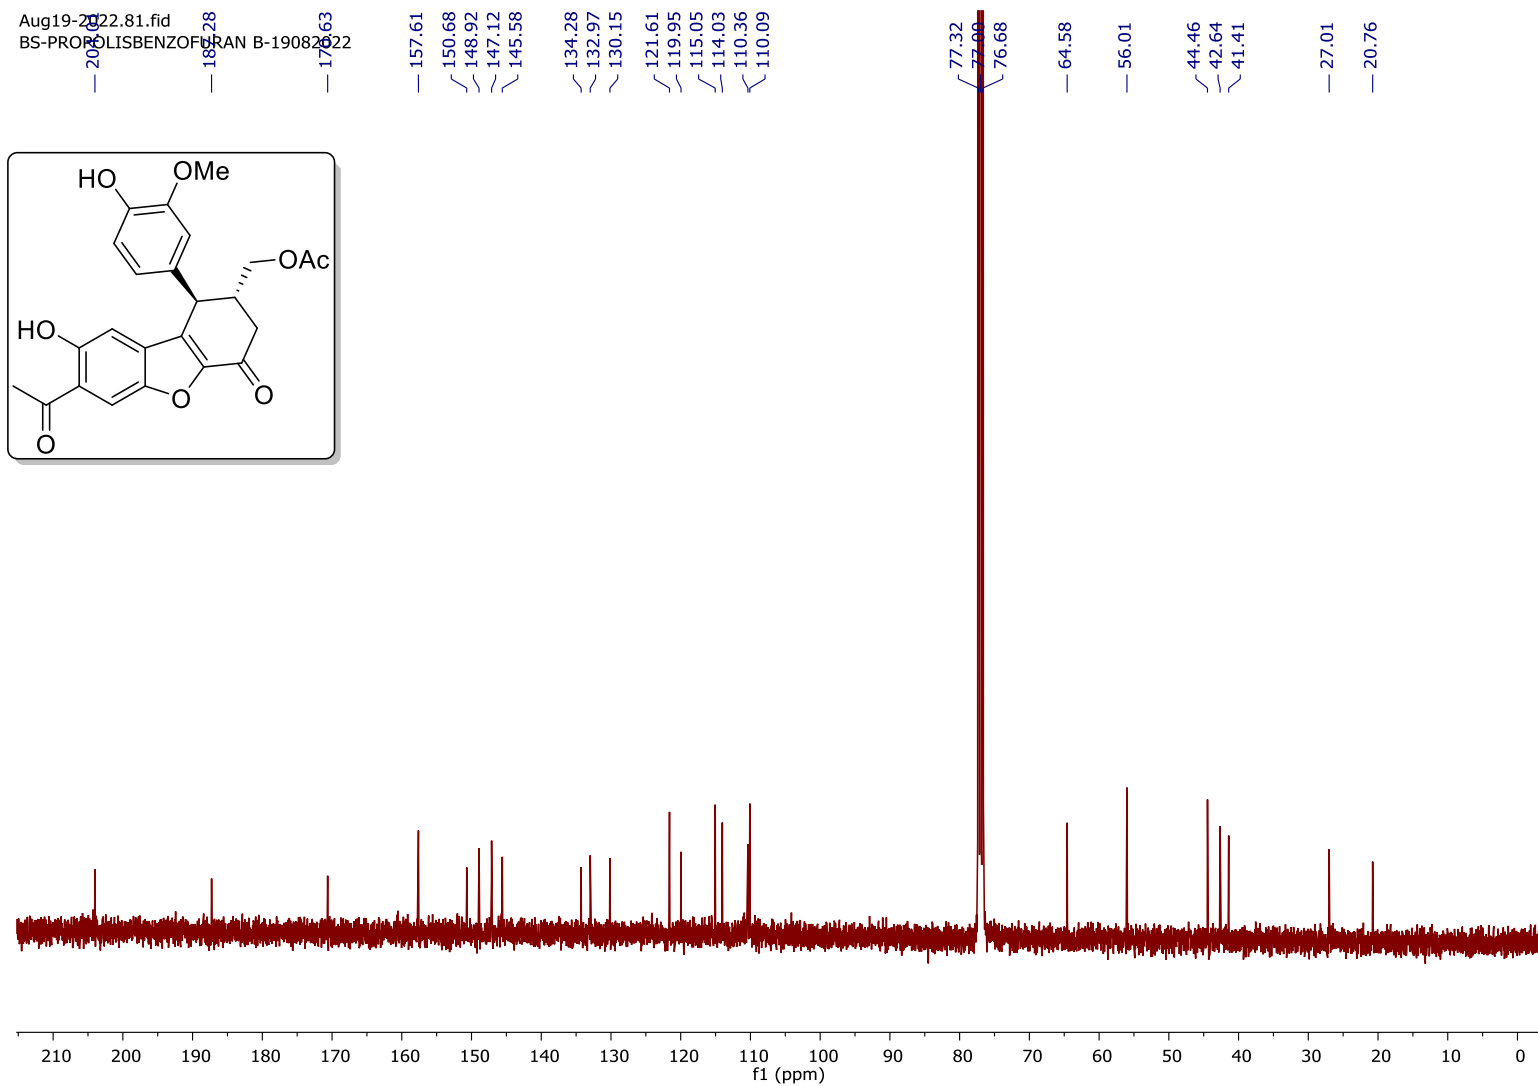

# DEPT-135 NMR of (+)-propolisbenzofuran B (1) (100 MHz, CDCl<sub>3</sub>)

Aug19-2022.82.fid  
BS-PROPOLISBENZOFURAN B-19082022

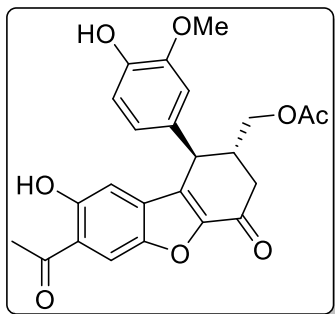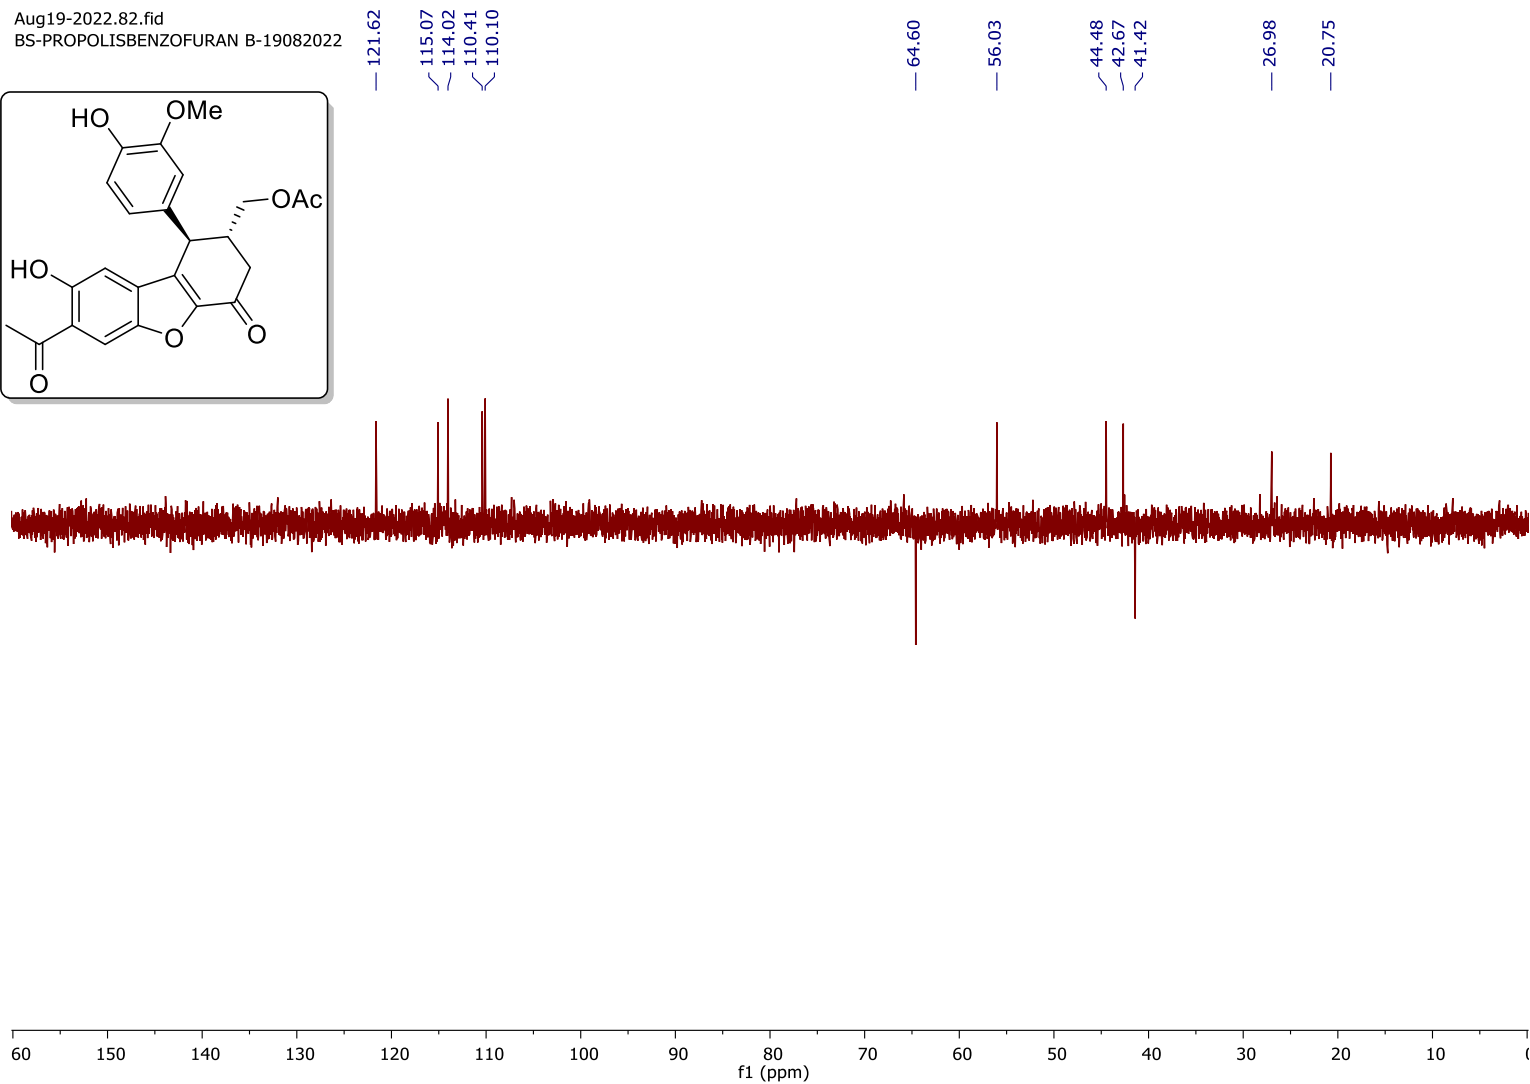

**<sup>1</sup>H NMR of (7-bromo-8-isopropoxy-1-(4-isopropoxy-3-methoxyphenyl)dibenzo[*b,d*]furan-2-yl)methyl acetate (16) (400 MHz, CDCl<sub>3</sub>)**

Aug19-2022.50.fid  
BS-785-MAJOR-19082022

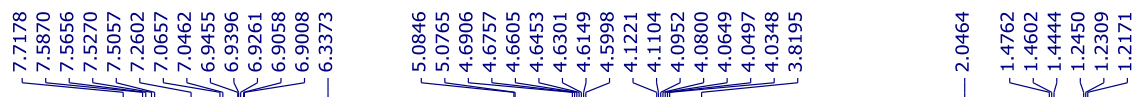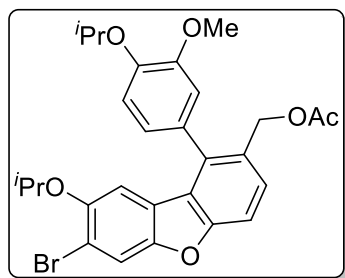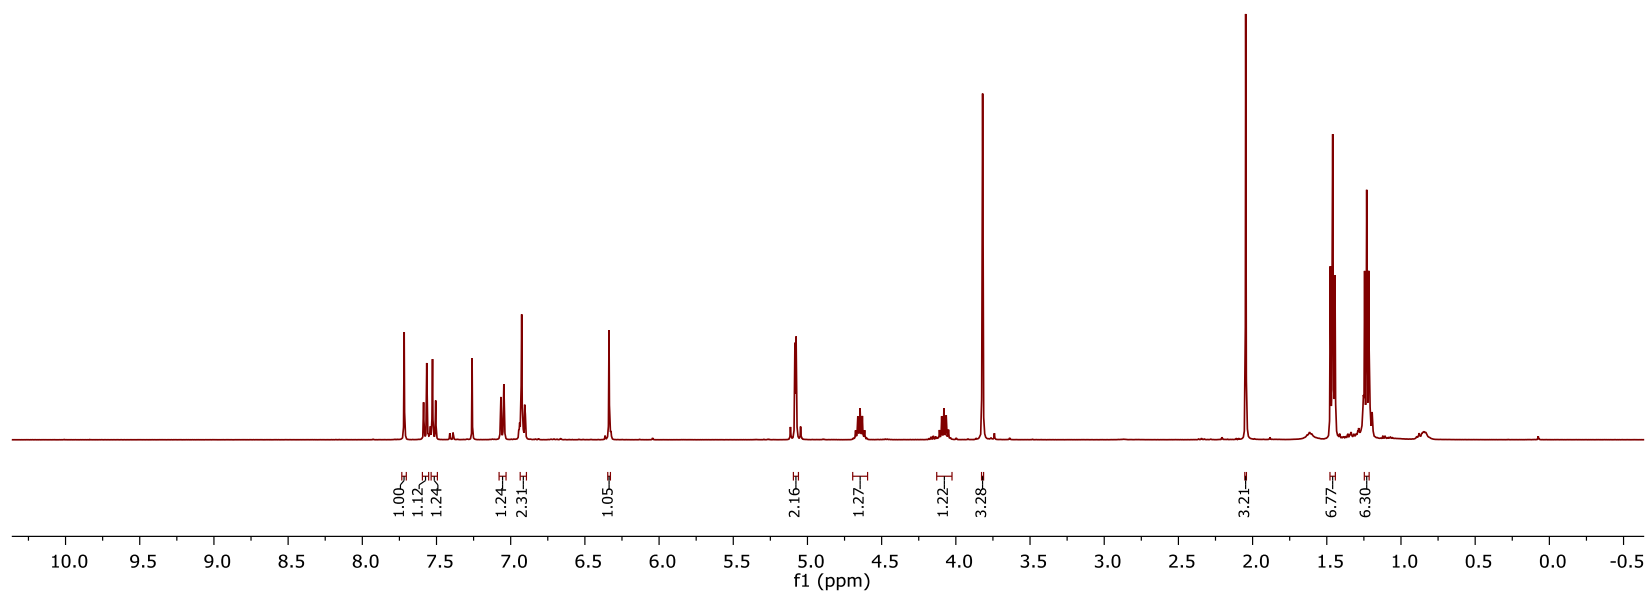

**<sup>13</sup>C NMR of (7-bromo-8-isopropoxy-1-(4-isopropoxy-3-methoxyphenyl)dibenzo[*b,d*]furan-2-yl)methyl acetate (16) (100 MHz, CDCl<sub>3</sub>)**

Aug19-2022.51.fid  
BS-785-MAJOR-19082022

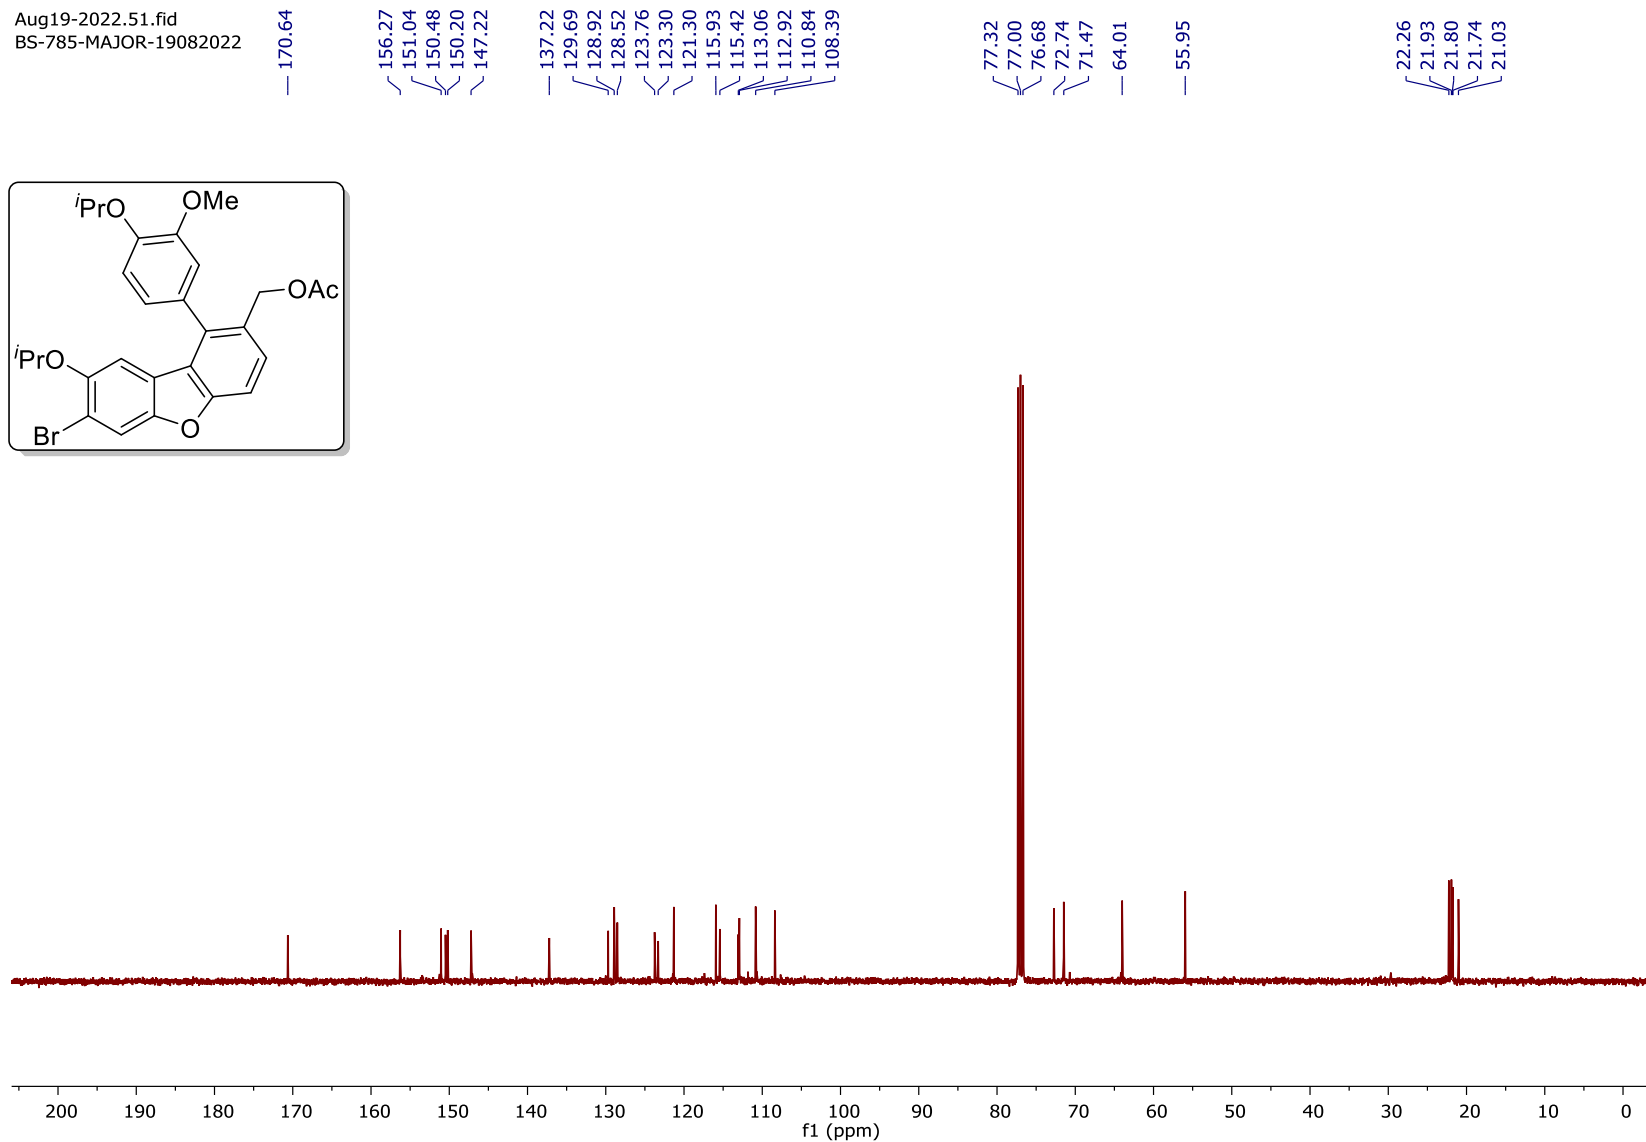



**<sup>13</sup>C NMR of ((5*R*,6*R*)-10-acetyl-9-isopropoxy-6-(4-isopropoxy-3-methoxyphenyl)-2,7-dioxo-2,3,4,5,6,7-hexahydrobenzo[*b*]oxonin-5-yl)methyl acetate (17) (100 MHz, CDCl<sub>3</sub>)**

Sep02-2022-130.fid  
BS-ALLYL-CX-US-02092022

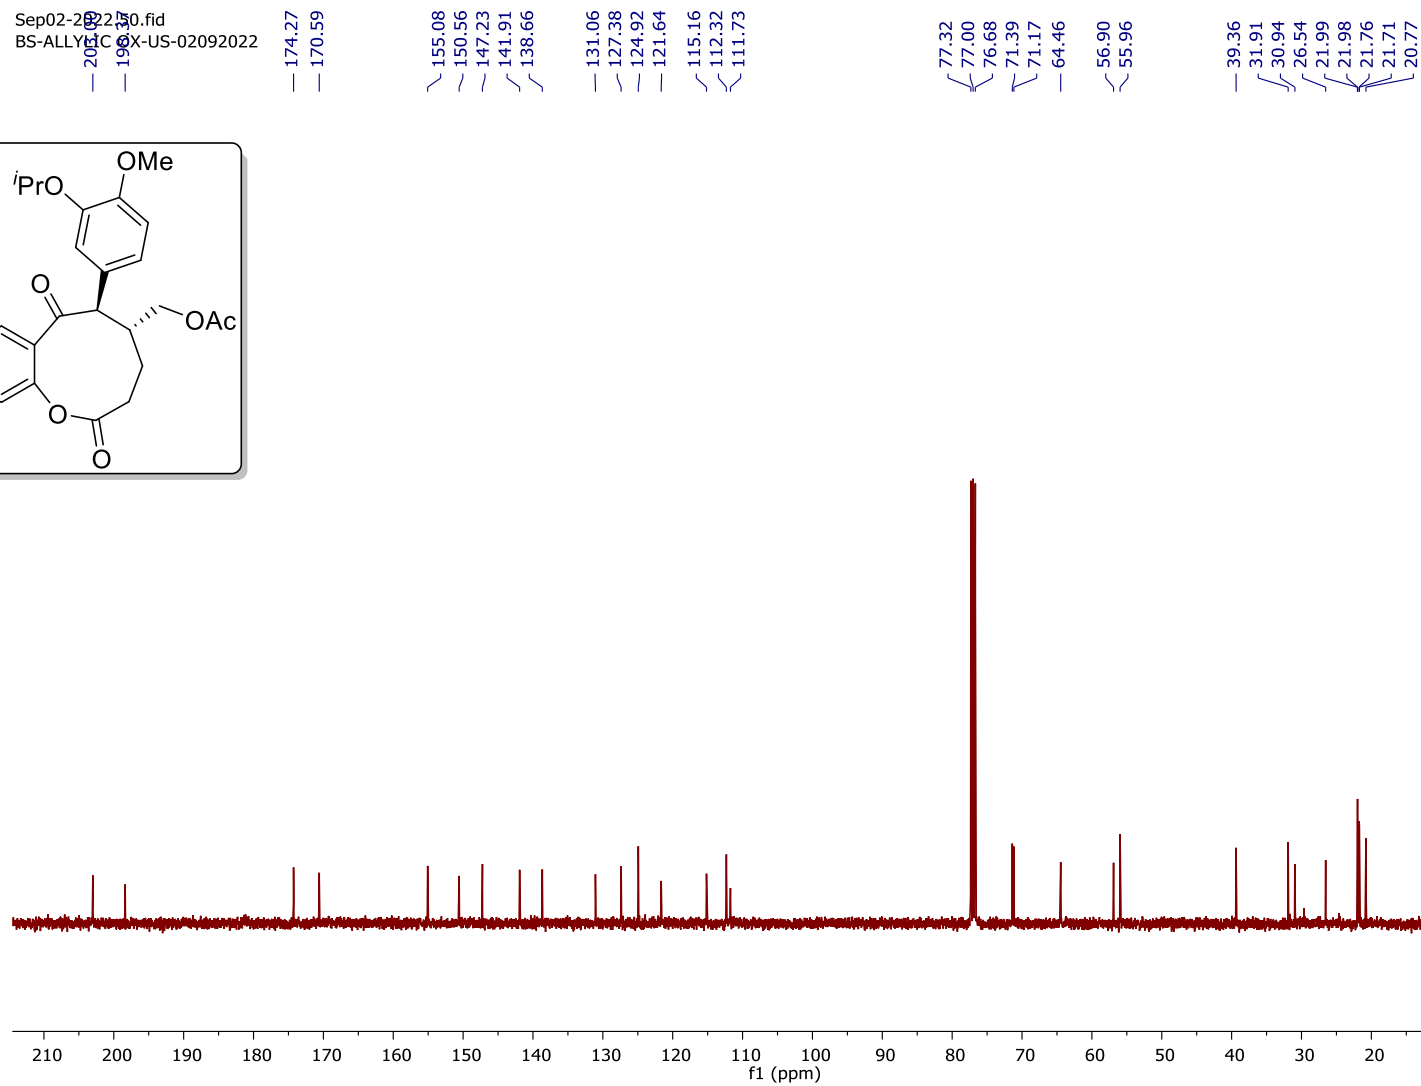

DEPT-135 NMR of ((5*R*,6*R*)-10-acetyl-9-isopropoxy-6-(4-isopropoxy-3-methoxyphenyl)-2,7-dioxo-2,3,4,5,6,7-hexahydrobenzo[*b*]oxonin-5-yl)methyl acetate (17) (100 MHz, CDCl<sub>3</sub>)

BS-788-US-19082022

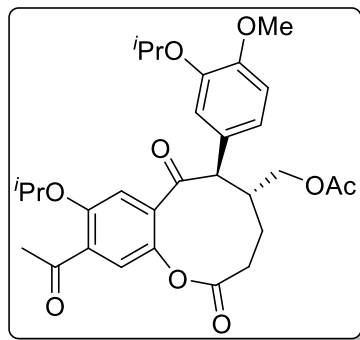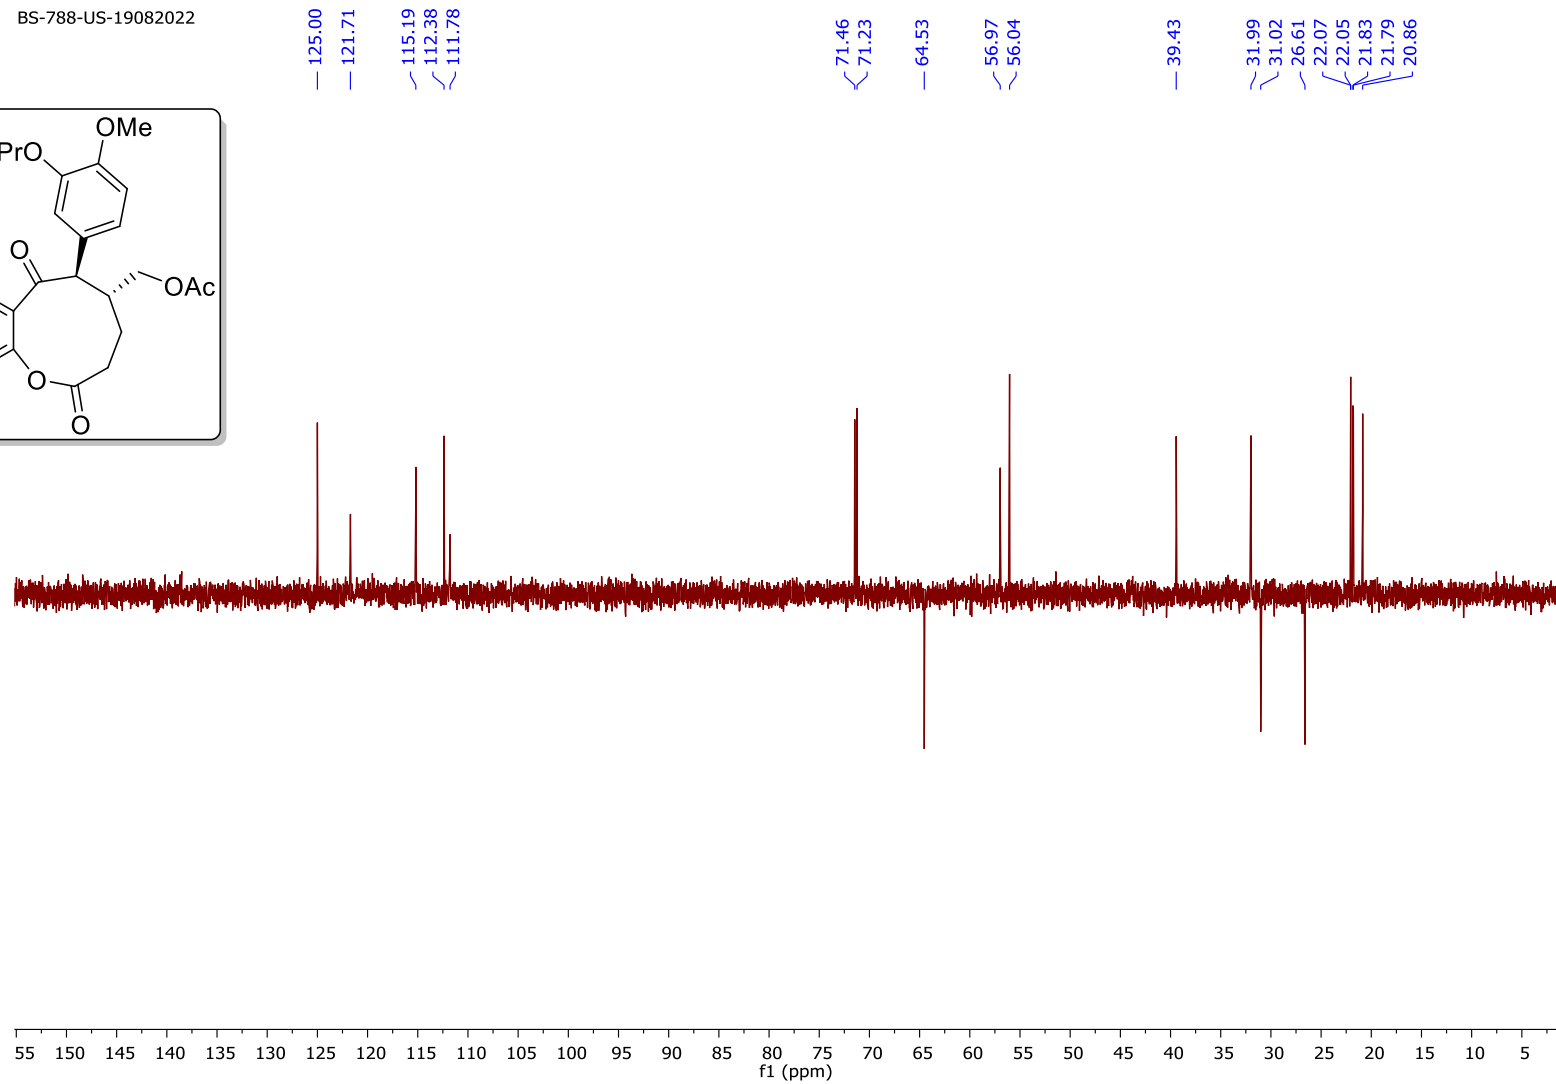

**HSQC Spectra of ((5*R*,6*R*)-10-acetyl-9-isopropoxy-6-(4-isopropoxy-3-methoxyphenyl)-2,7-dioxo-2,3,4,5,6,7-hexahydrobenzo[*b*]oxonin-5-yl)methyl acetate (17) (200 MHz, CDCl<sub>3</sub>)**

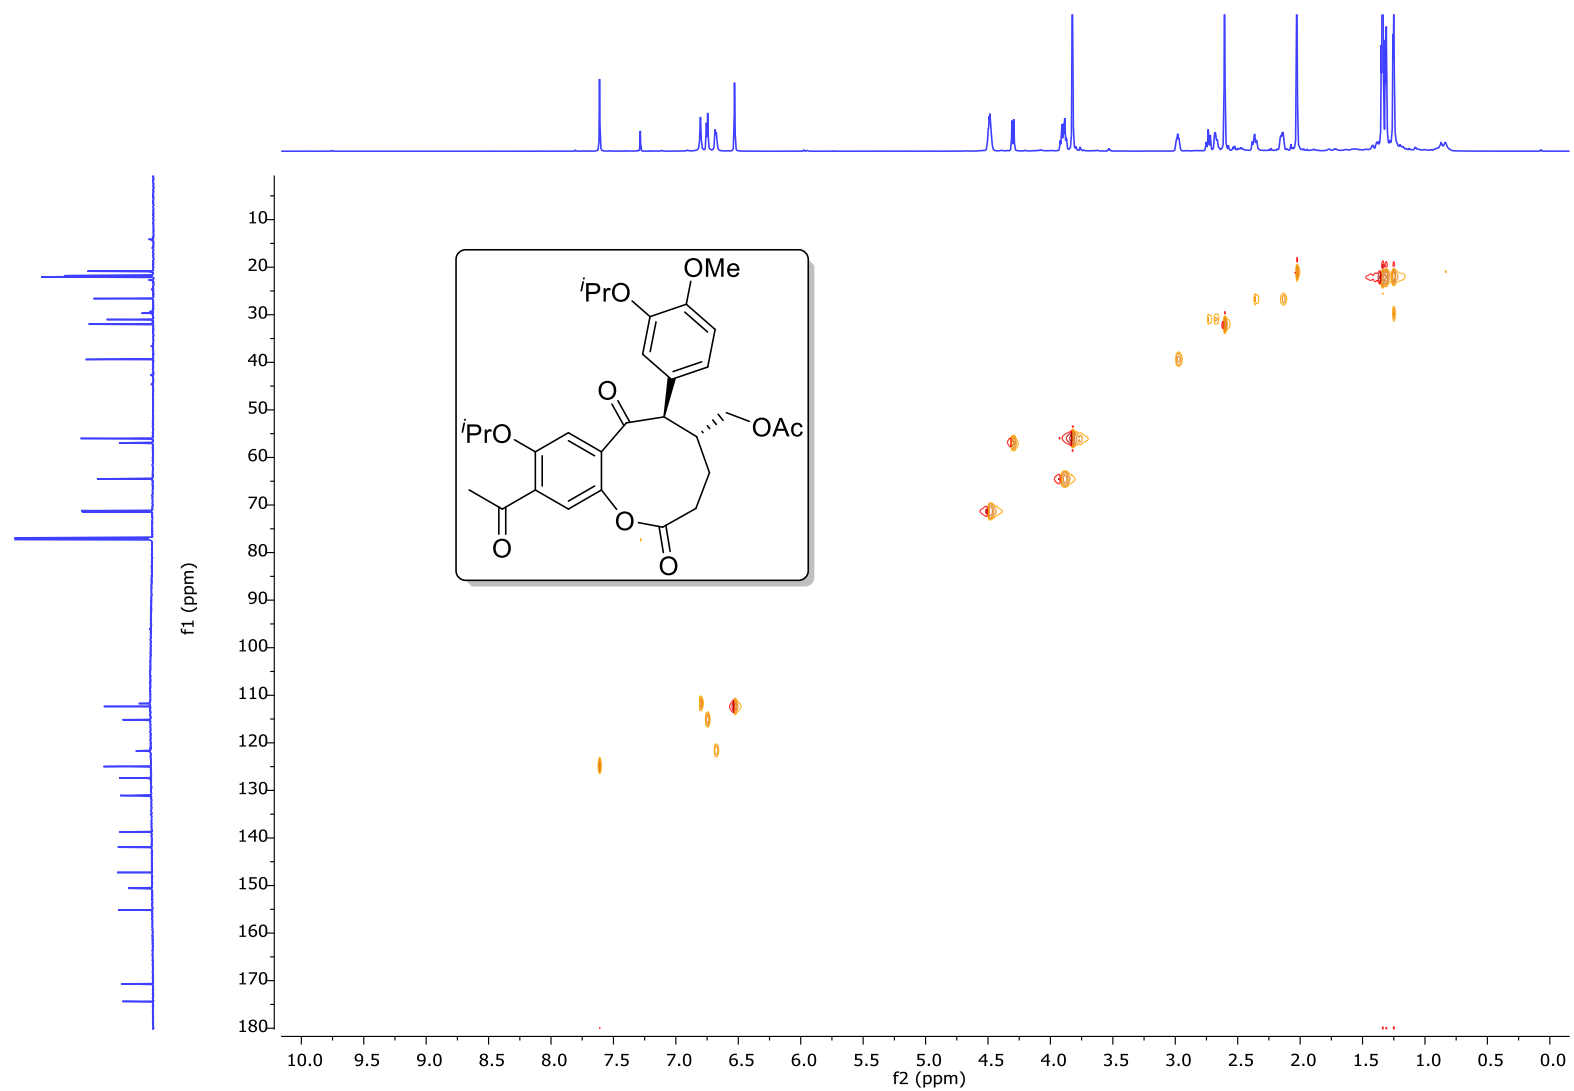



**HMBC Spectra of ((5*R*,6*R*)-10-acetyl-9-isopropoxy-6-(4-isopropoxy-3-methoxyphenyl)-2,7-dioxo-2,3,4,5,6,7-hexahydrobenzo[*b*]oxonin-5-yl)methyl acetate (17) (200 MHz, CDCl<sub>3</sub>)**

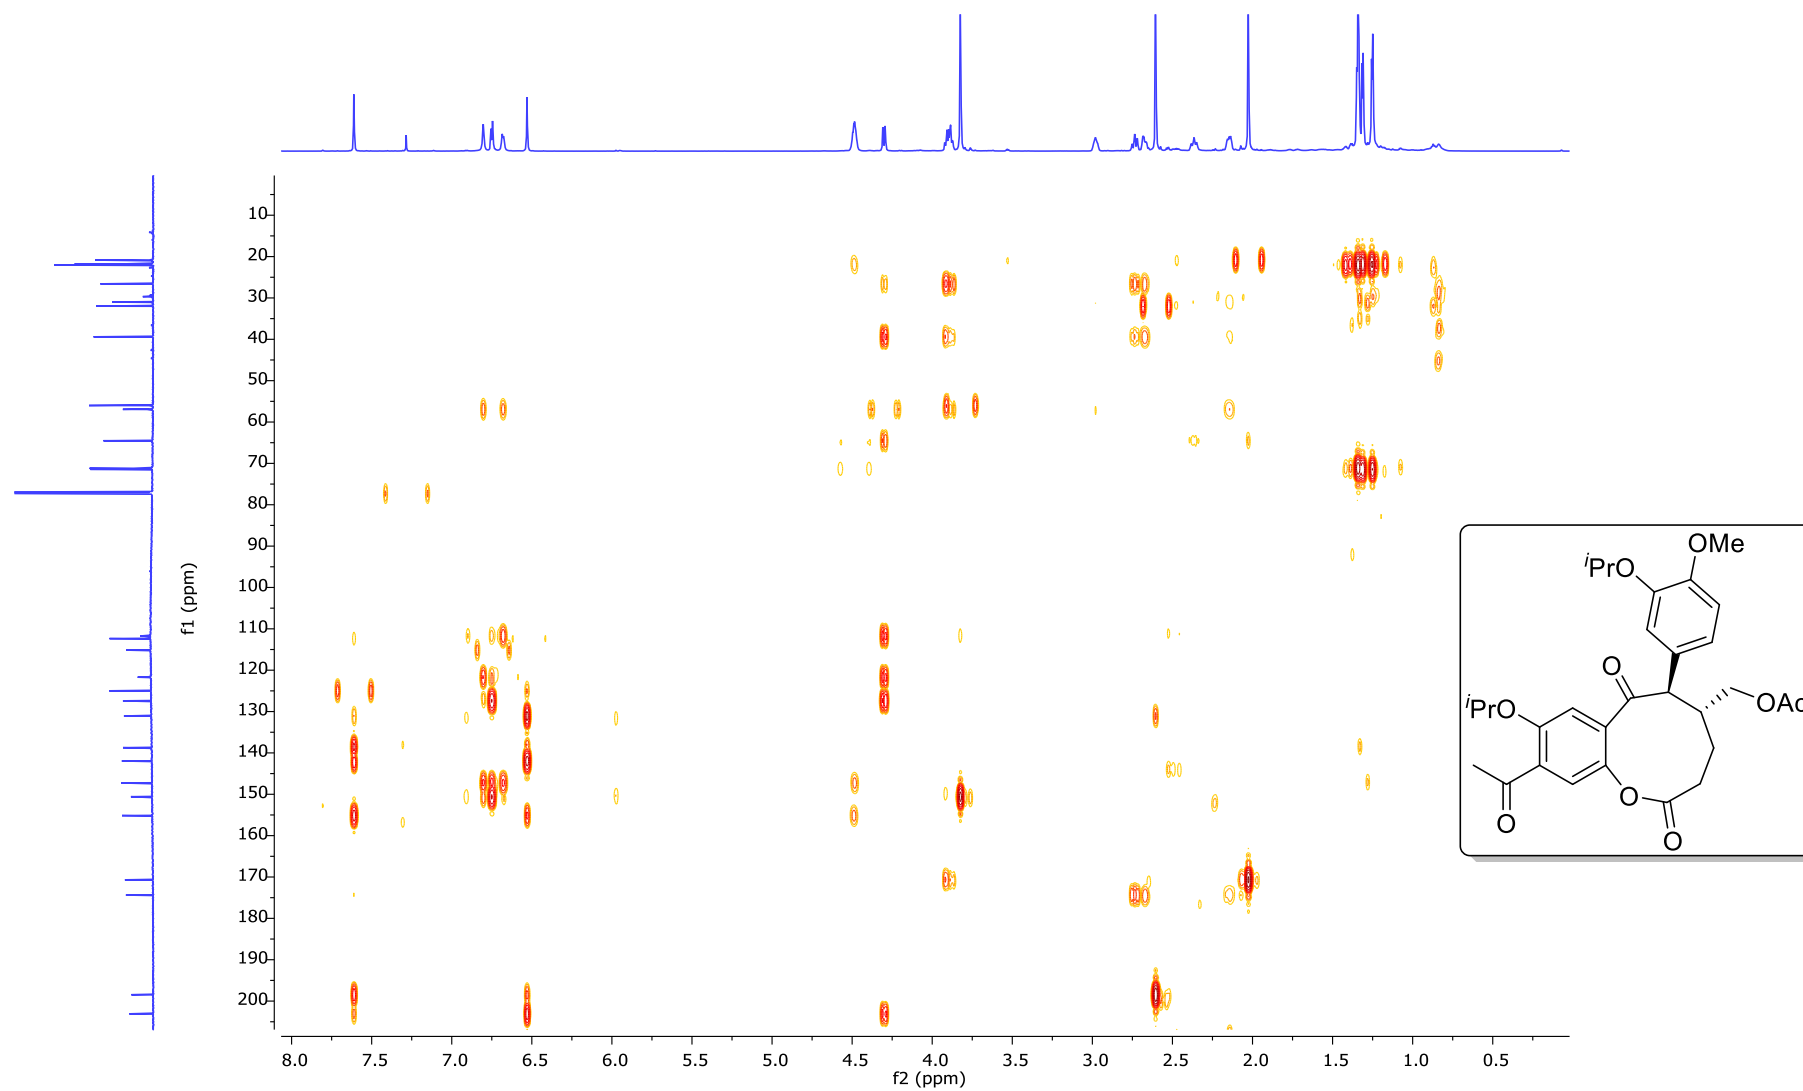

**<sup>1</sup>H NMR of ((1*R*,2*R*)-8-isopropoxy-1-(4-isopropoxy-3-methoxyphenyl)-1,2,3,4-tetrahydrodibenzo[*b,d*]furan-2-yl)methanol (18) (400 MHz, CDCl<sub>3</sub>)**

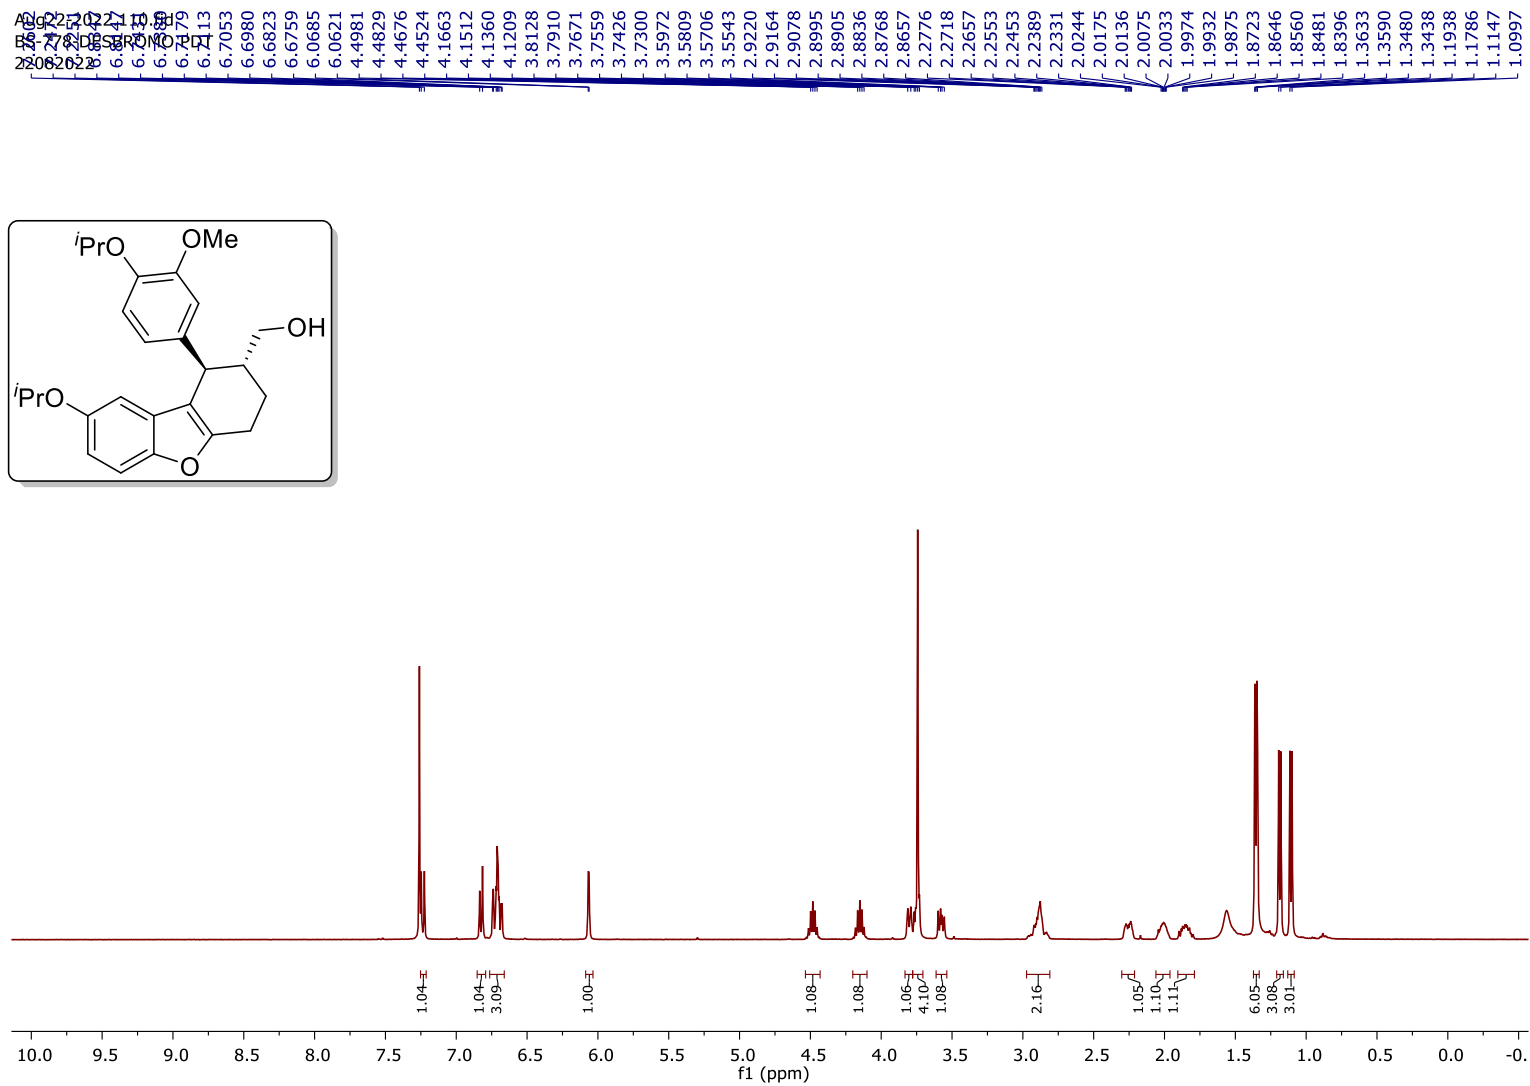

**<sup>13</sup>C NMR of ((1*R*,2*R*)-8-isopropoxy-1-(4-isopropoxy-3-methoxyphenyl)-1,2,3,4-tetrahydrodibenzo[*b,d*]furan-2-yl)methanol (18) (100 MHz, CDCl<sub>3</sub>)**

Aug22-2022.170.fid  
BS-778-Desbromo pdt-22082022

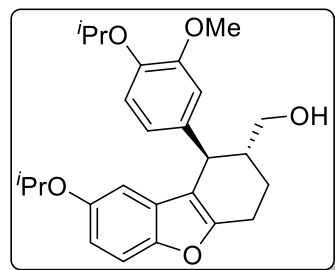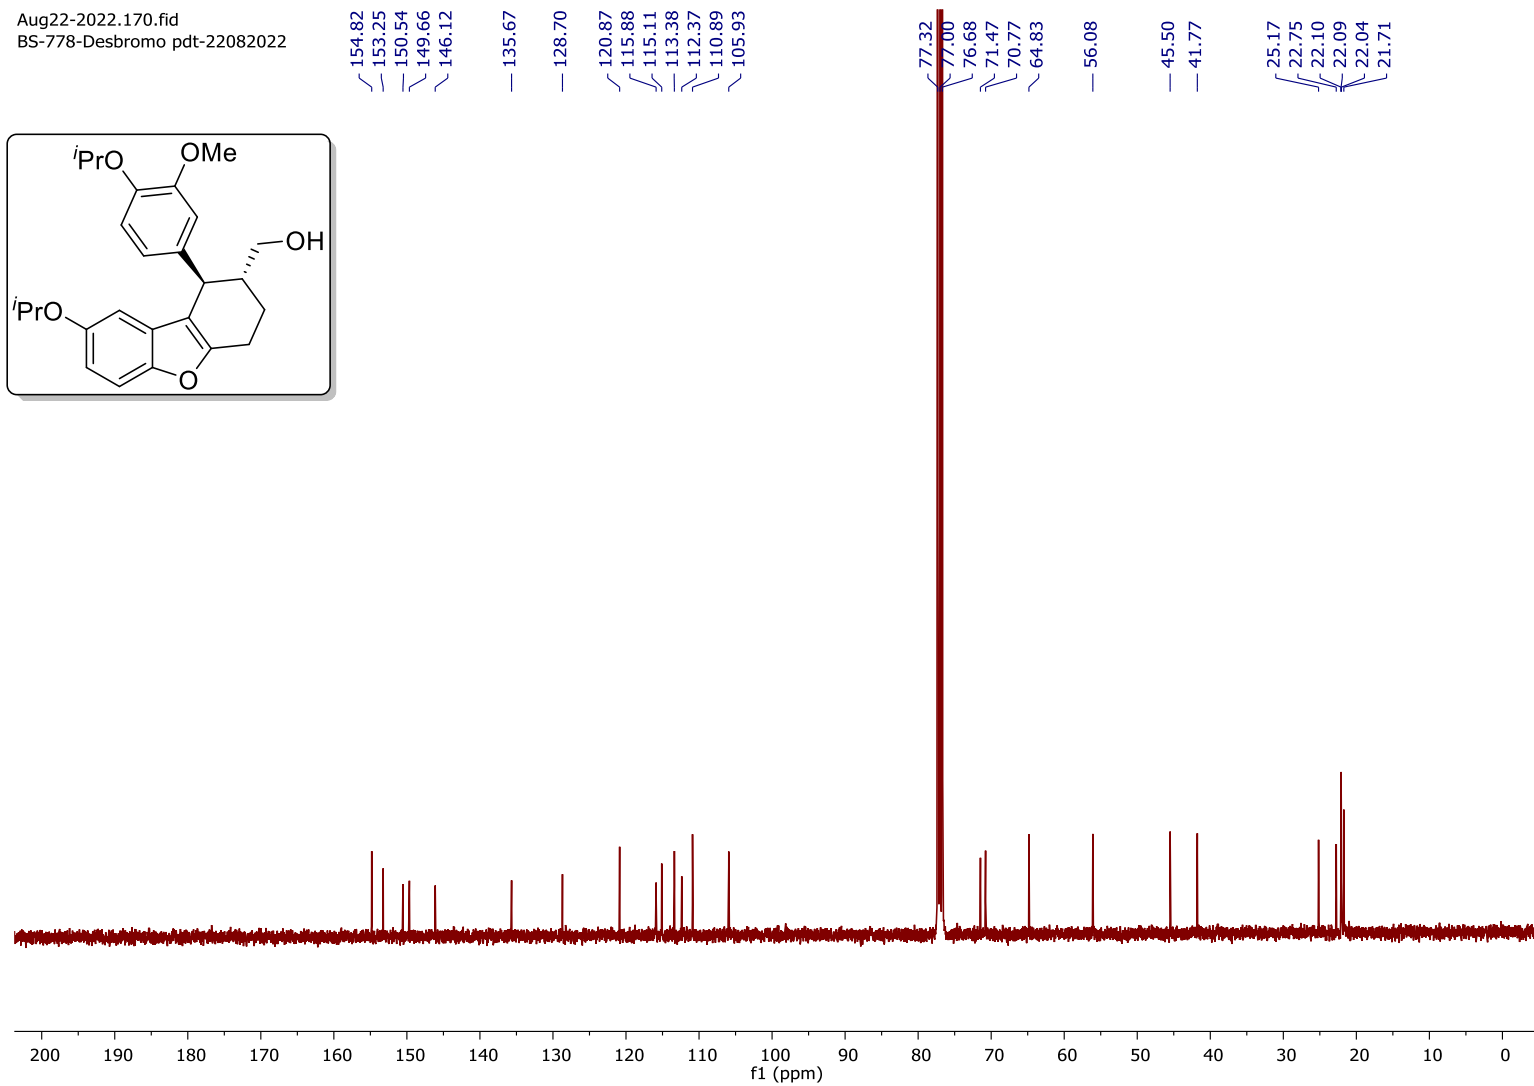

**<sup>1</sup>H NMR of ((1*R*,2*R*)-8-isopropoxy-1-(4-isopropoxy-3-methoxyphenyl)-7-phenyl-1,2,3,4-tetrahydrodibenzo[*b,d*]furan-2-yl)methyl acetate (19) (800 MHz, CDCl<sub>3</sub>)**

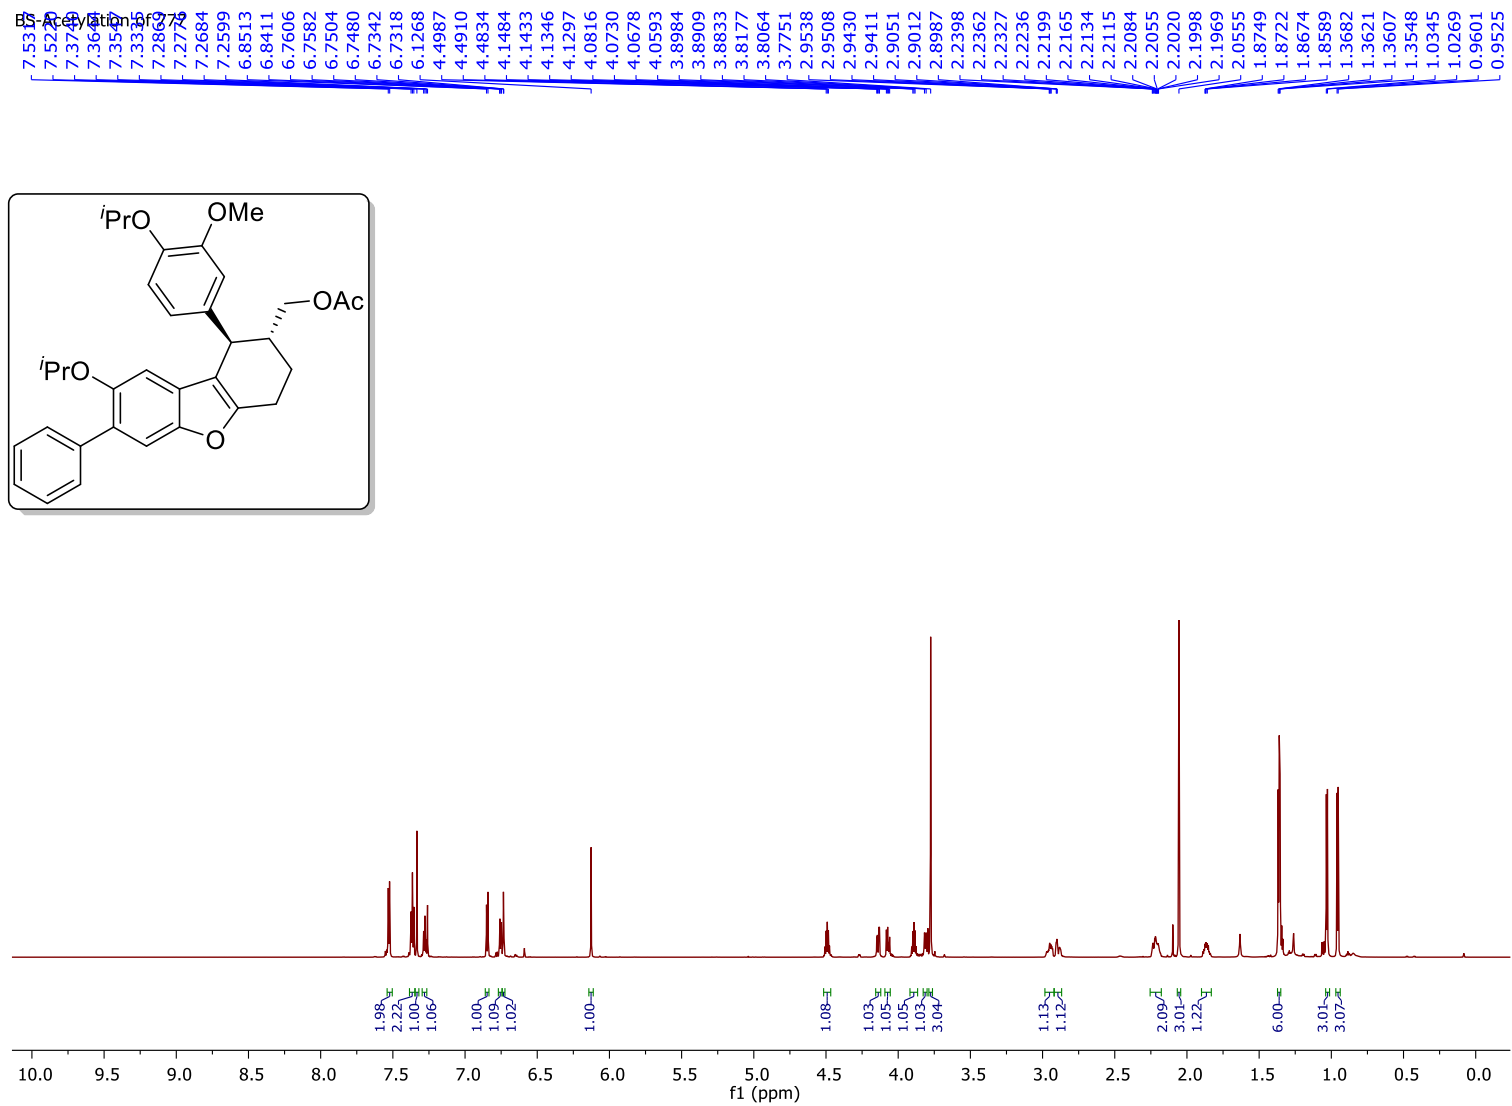

**$^{13}\text{C}$  NMR of ((1*R*,2*R*)-8-isopropoxy-1-(4-isopropoxy-3-methoxyphenyl)-7-phenyl-1,2,3,4-tetrahydrodibenzo[*b,d*]furan-2-yl)methyl acetate (19) (200 MHz,  $\text{CDCl}_3$ )**

BS-Acetylation of 777

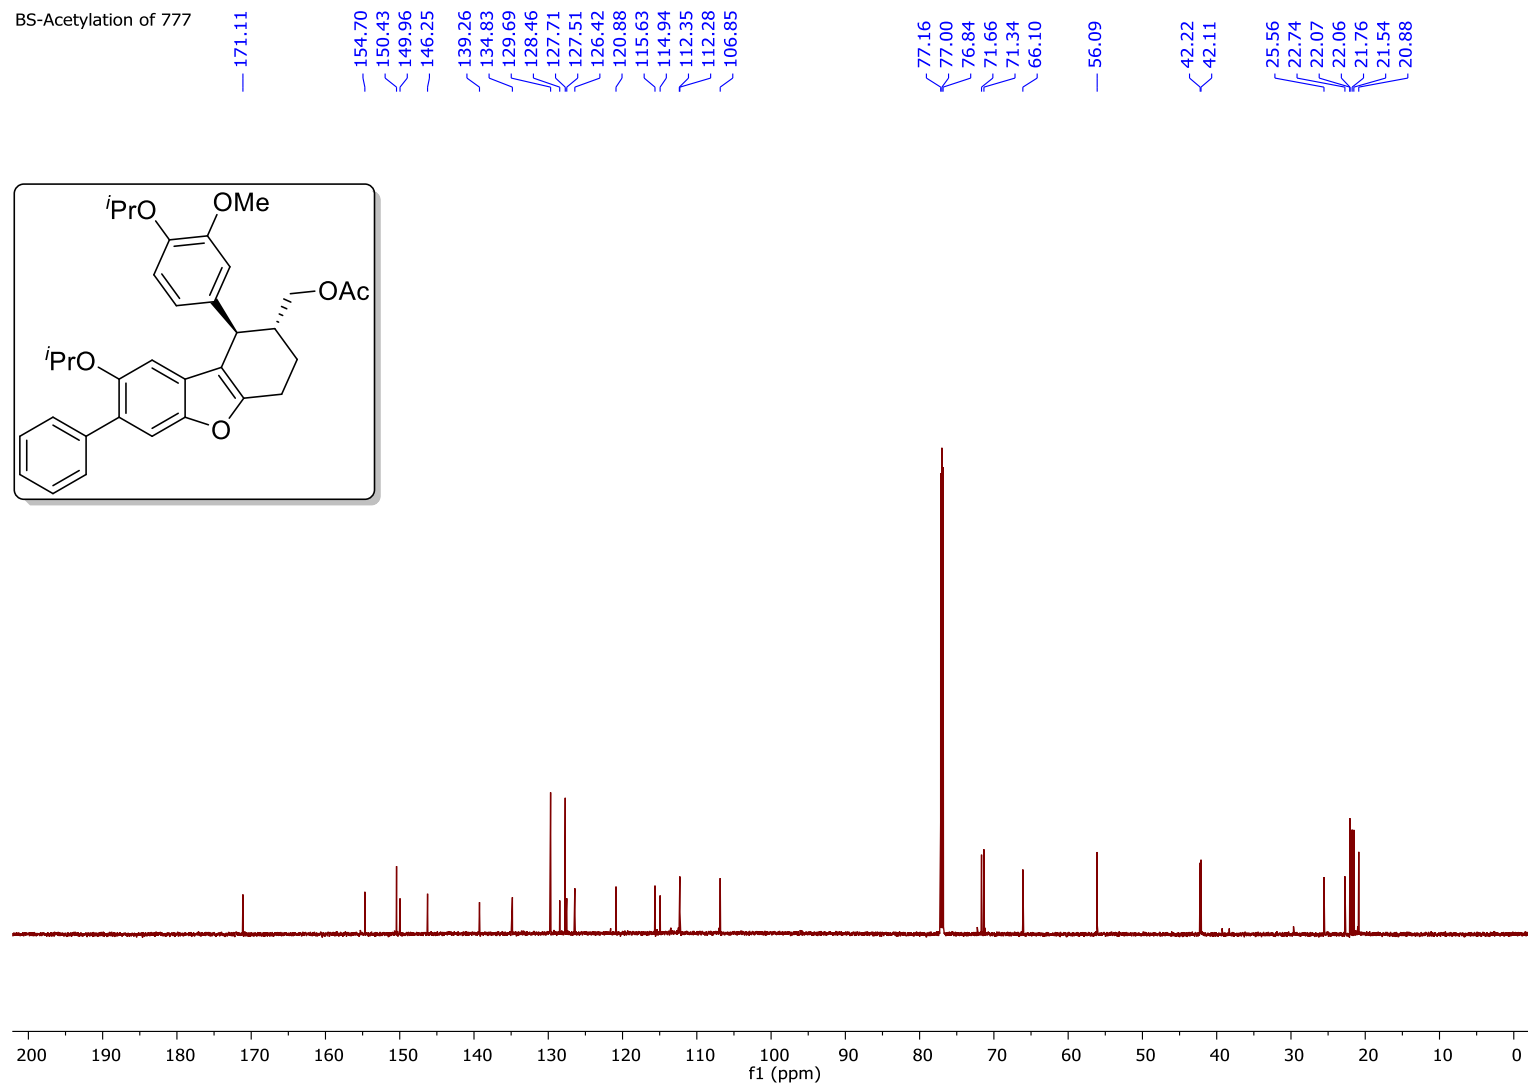

**<sup>1</sup>H NMR of ((1*R*,2*R*)-8-isopropoxy-1-(4-isopropoxy-3-methoxyphenyl)-7-vinyl-1,2,3,4-tetrahydrodibenzo[*b,d*]furan-2-yl)methyl acetate (20) (400 MHz, CDCl<sub>3</sub>)**

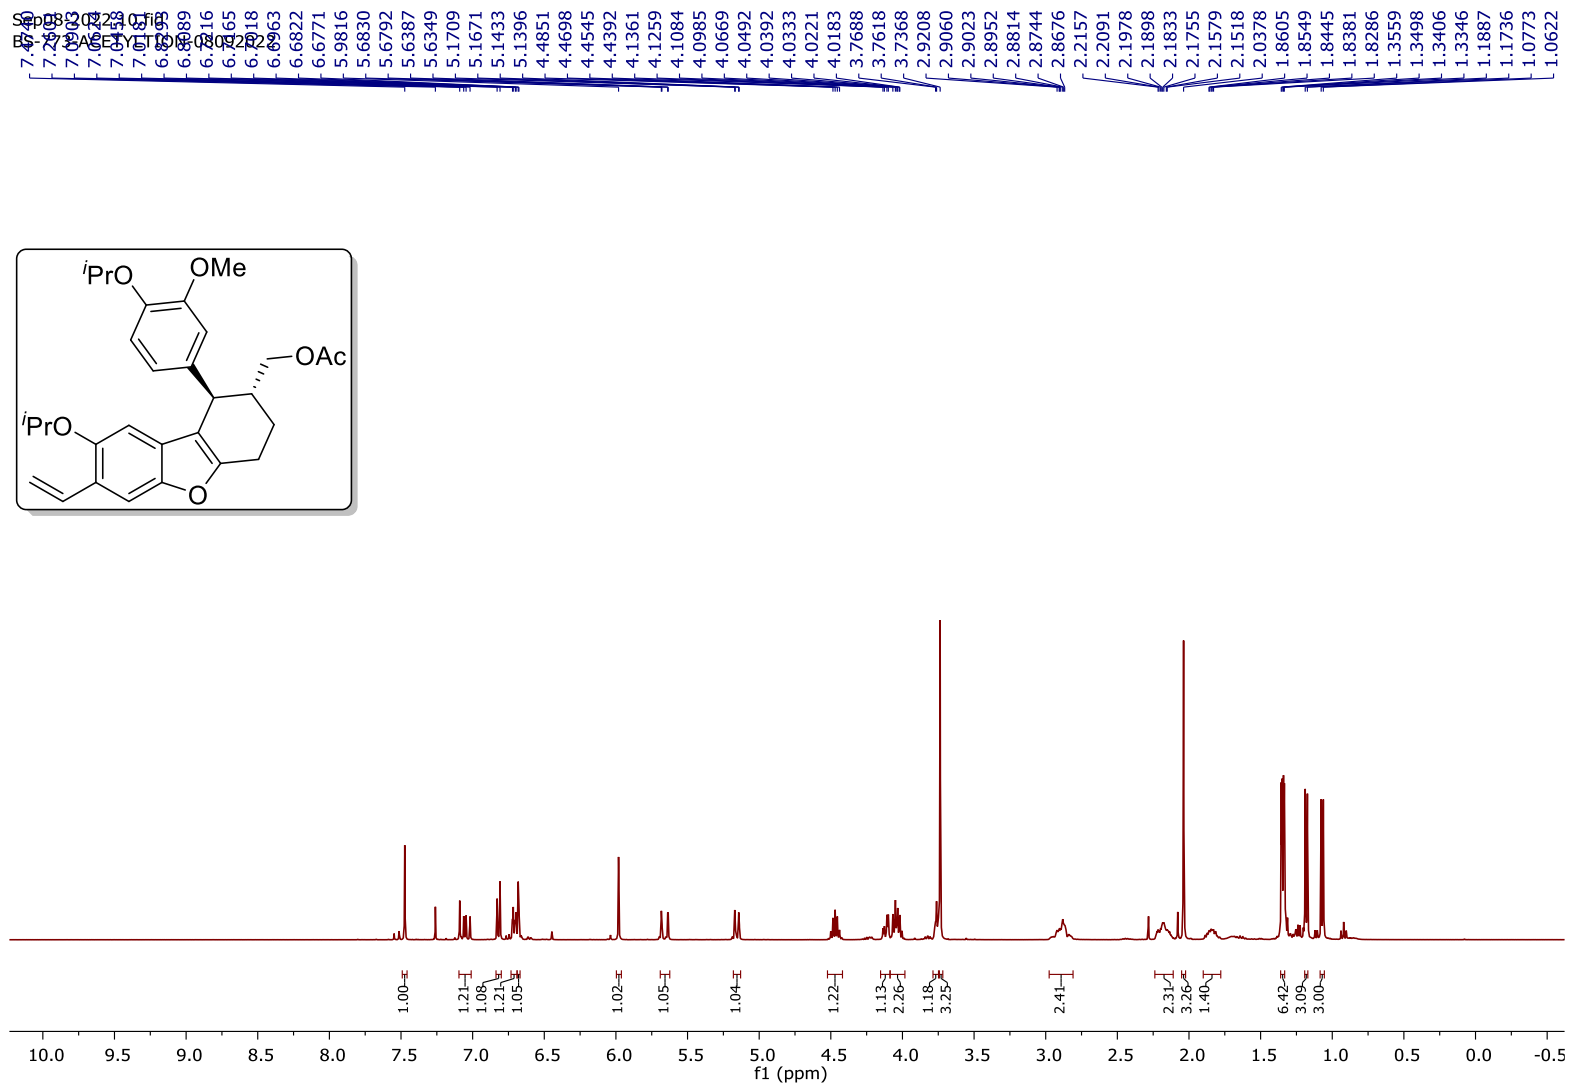

**<sup>13</sup>C NMR of ((1*R*,2*R*)-8-isopropoxy-1-(4-isopropoxy-3-methoxyphenyl)-7-vinyl-1,2,3,4-tetrahydrodibenzo[*b,d*]furan-2-yl)methyl acetate (20) (100 MHz, CDCl<sub>3</sub>)**

Sep08-2022.22.fid  
BS-773-ACETYLTION-08092022

177.03

154.90

150.92

150.48

149.77

146.23

134.84

132.36

128.12

124.25

120.89

115.76

115.03

112.61

112.35

107.34

105.22

77.32

77.01

76.70

71.40

66.05

56.04

42.20

42.06

25.53

22.75

22.04

22.03

21.61

20.82

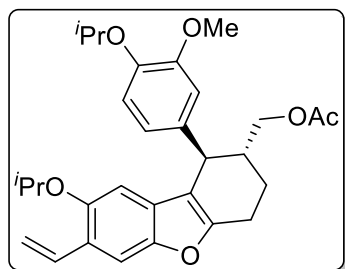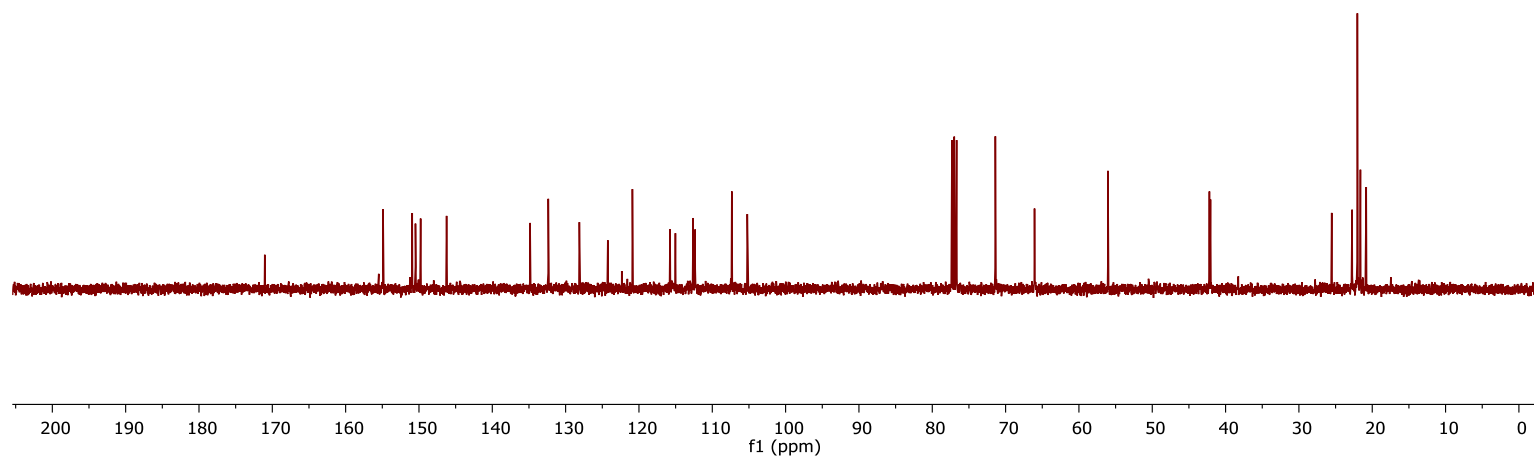

**<sup>1</sup>H NMR of 6-bromo-2-(4-oxobutyl)benzofuran-5-yl acetate (3a) (400 MHz, CDCl<sub>3</sub>)**

BS- Benzofuran ald  
15012019

— 9.7816

— 7.6507

7.2594

7.2234

— 6.3741

2.8167

2.7983

2.7799

2.5506

2.5326

2.5148

2.3650

2.0965

2.0784

2.0601

2.0420

2.0237

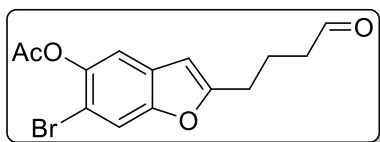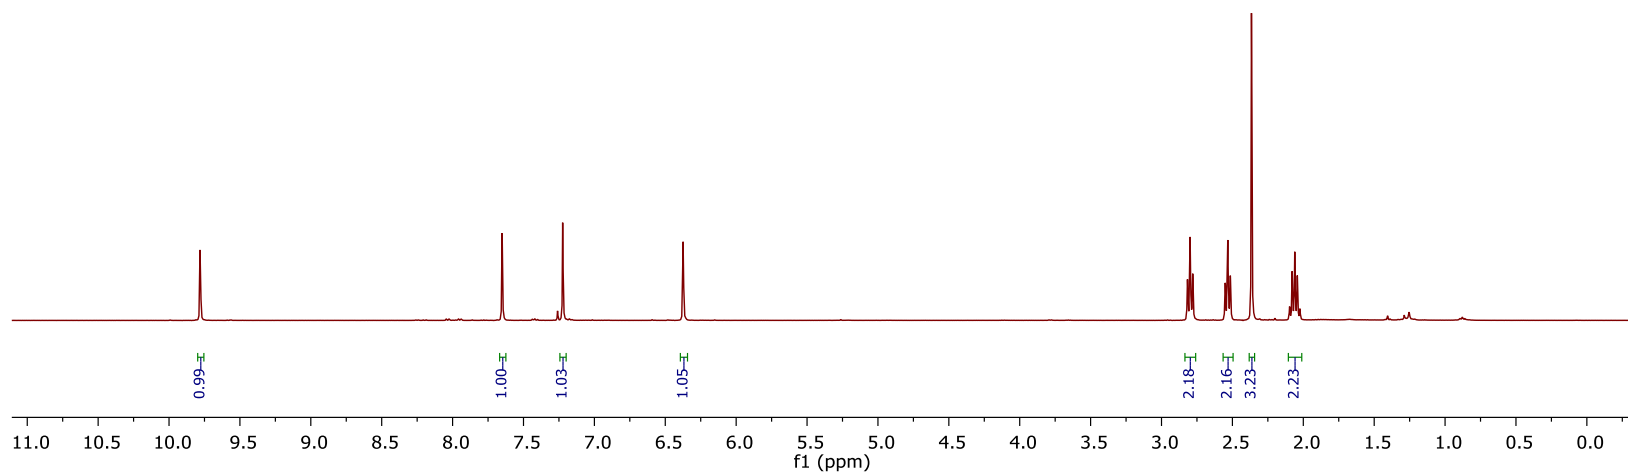



**<sup>13</sup>C NMR of 6-bromo-2-(4-oxobutyl)benzofuran-5-yl acetate (3a) (100 MHz, CDCl<sub>3</sub>)**

BS- Benzofuran ald  
15012019

— 201.30

— 169.17

— 160.16

— 152.50

— 143.56

— 128.88

— 115.13

— 114.25

— 110.74

— 102.78

— 77.32

— 77.00

— 76.68

— 42.76

— 27.52

— 20.78

— 19.94

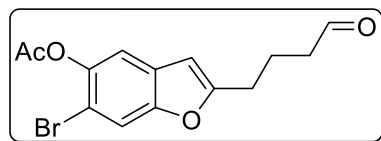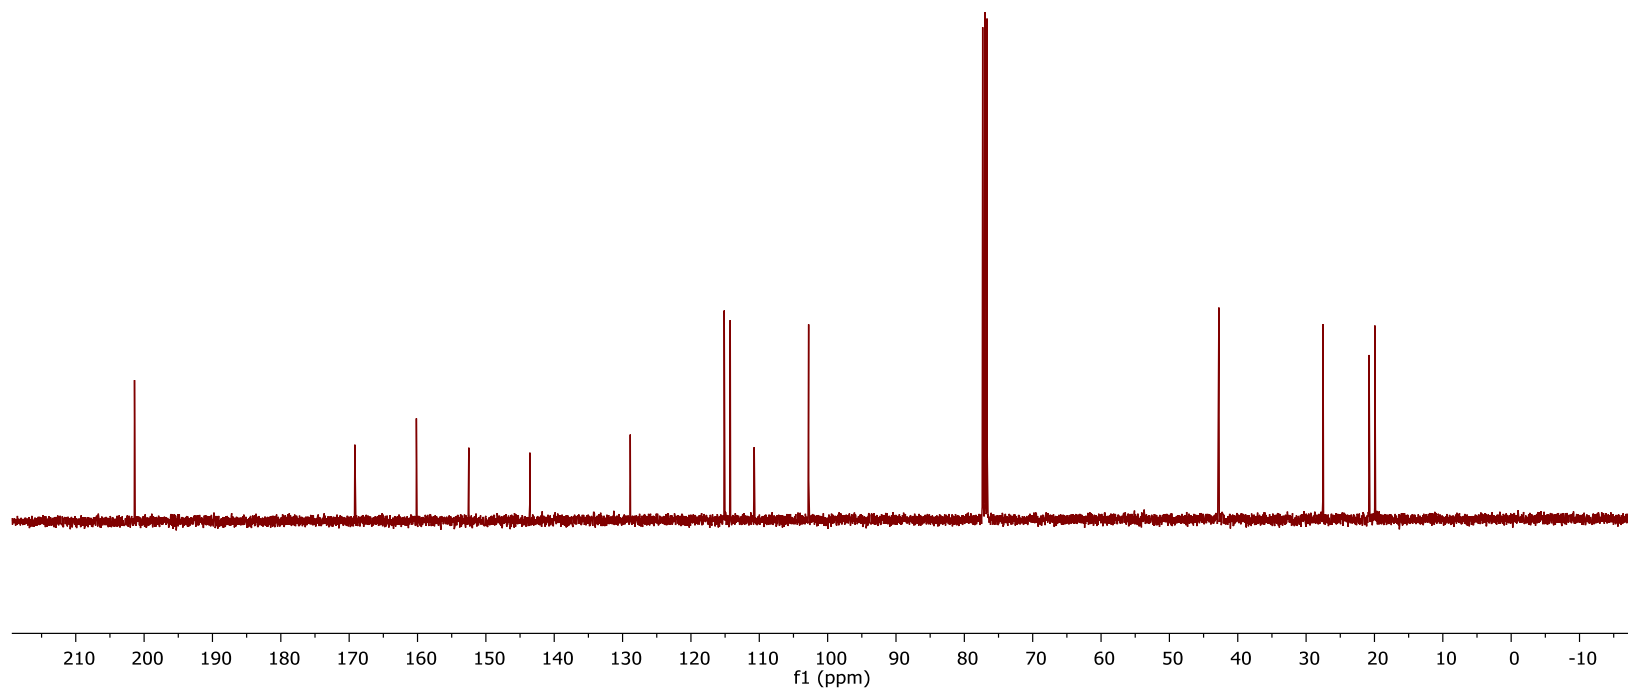

**<sup>1</sup>H NMR of 4-formyl-2-methoxyphenyl 4-nitrobenzenesulfonate (4) (400 MHz, DMSO-d<sub>6</sub>)**

BS-O-Ns-Van DMSO d<sub>6</sub>

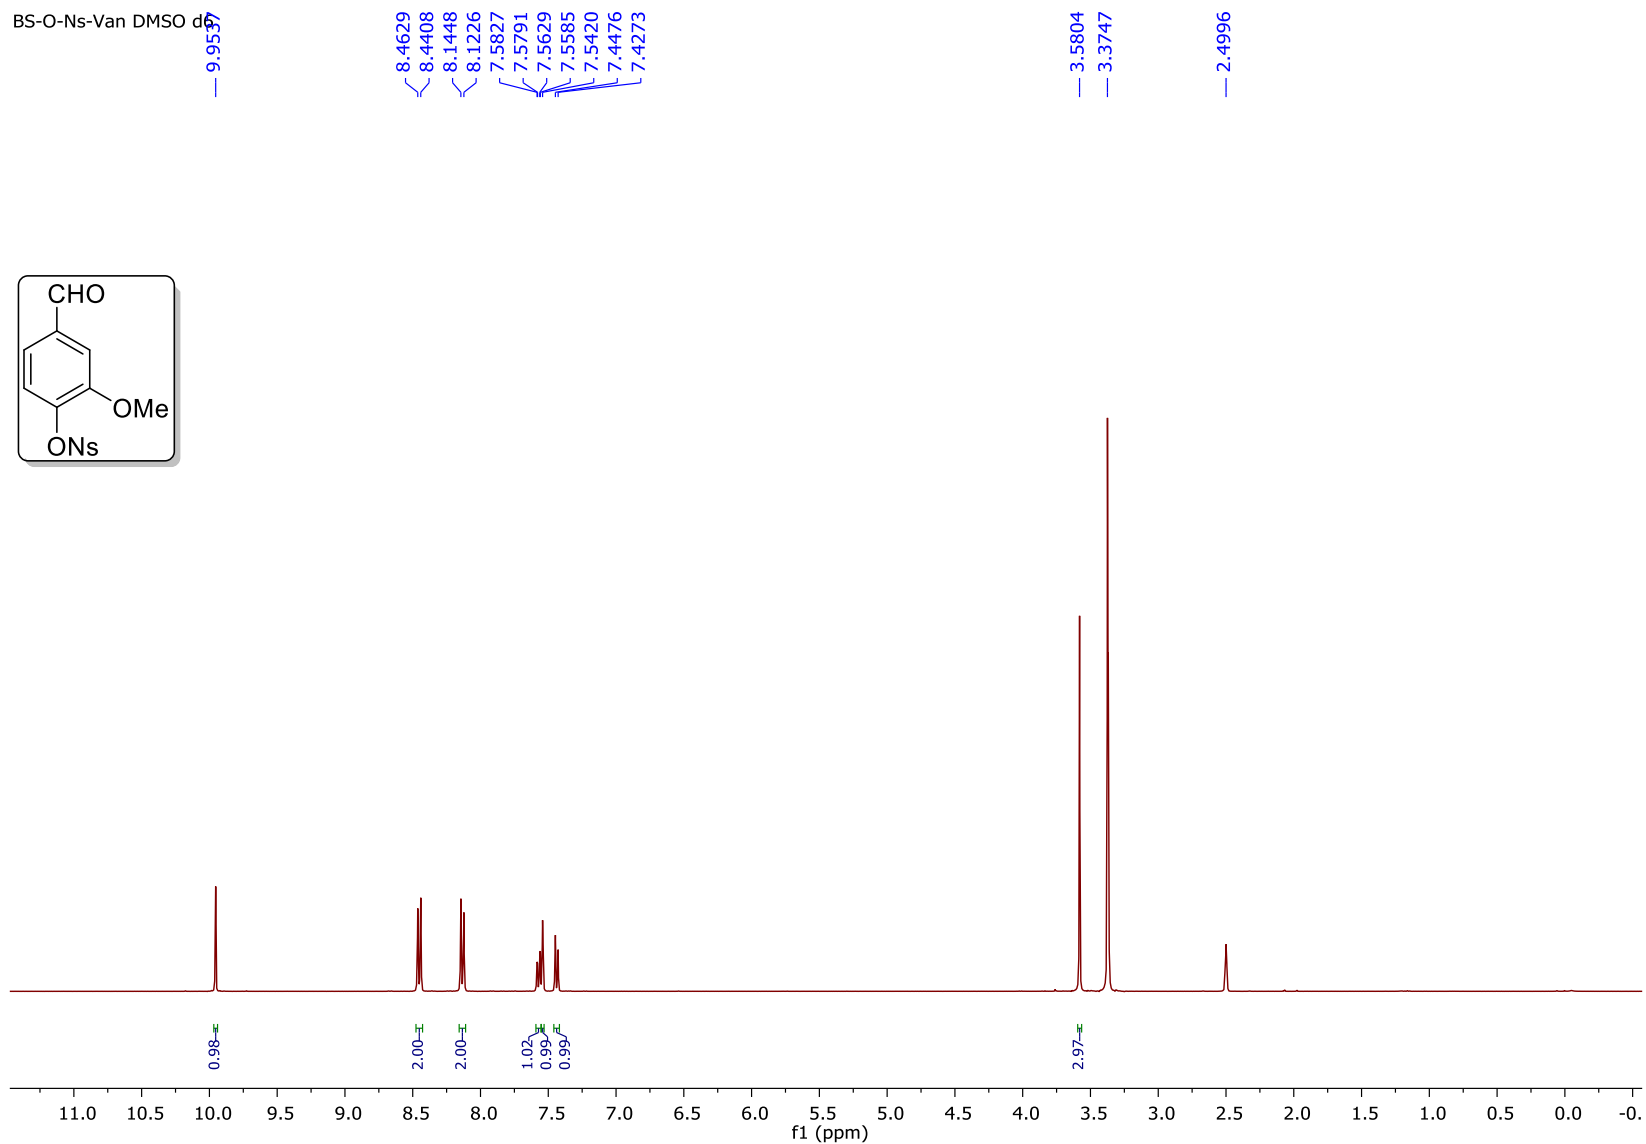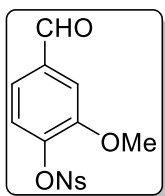

**<sup>13</sup>C NMR of 4-formyl-2-methoxyphenyl 4-nitrobenzenesulfonate (4) (100 MHz, DMSO-*d*<sub>6</sub>)**

BS-O-Ns-V48 DMSO d6

— 191.36

— 151.73  
— 151.06

— 141.43  
— 140.16

— 136.25

— 129.98

— 124.74

— 124.58

— 123.22

— 112.86

— 55.87

— 40.14

— 39.93

— 39.72

— 39.51

— 39.30

— 39.09

— 38.88

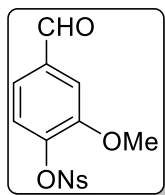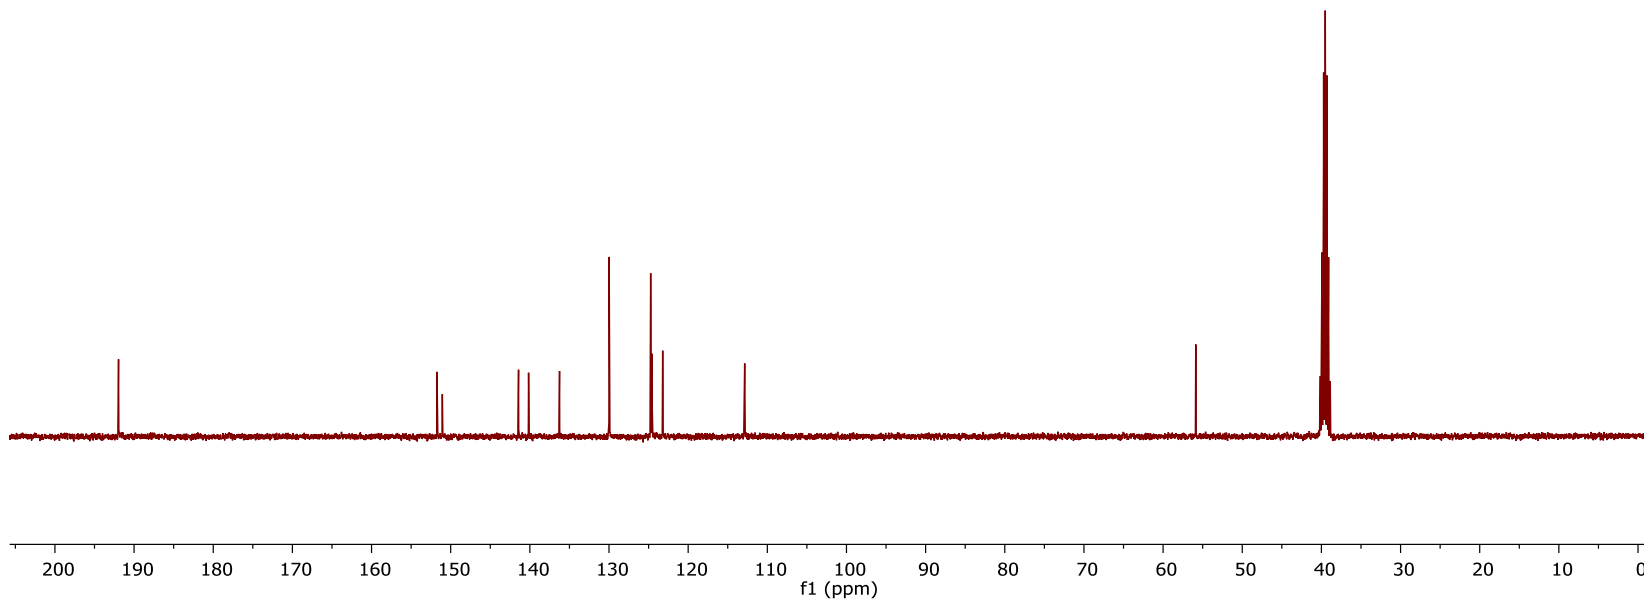

**<sup>1</sup>H NMR of (*E*)-6-bromo-2-(3-formyl-4-(3-methoxy-4-(((4-nitrophenyl)sulfonyl)oxy)phenyl)but-3-en-1-yl)benzofuran-5-yl acetate (22)**  
**(400 MHz, CDCl<sub>3</sub>)**

BS- Ns Van aldol cond with Benz ald  
 28022019

9.595  
 8.4296  
 8.4085  
 8.1768  
 8.1557  
 7.5411  
 7.2995  
 7.2744  
 7.2602  
 7.2206  
 6.9995  
 6.9786  
 6.8398  
 6.3505  
 3.5521  
 2.9780  
 2.4012

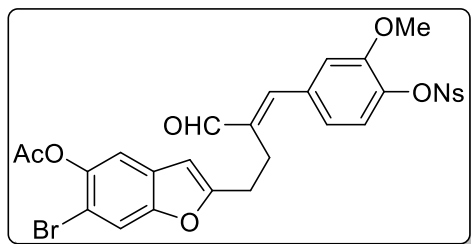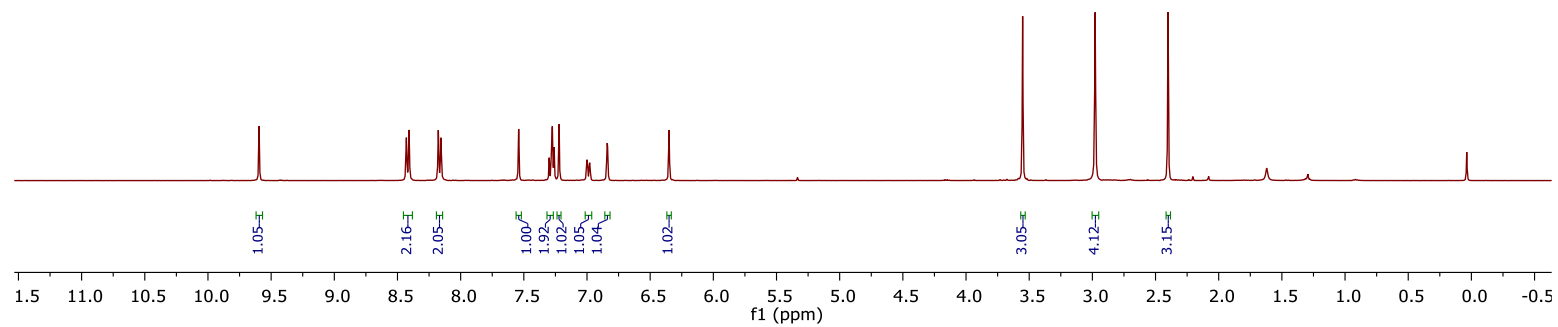

**<sup>13</sup>C NMR of (*E*)-6-bromo-2-(3-formyl-4-(3-methoxy-4-(((4-nitrophenyl)sulfonyl)oxy)phenyl)but-3-en-1-yl)benzofuran-5-yl acetate (22)**  
**(100 MHz, CDCl<sub>3</sub>)**

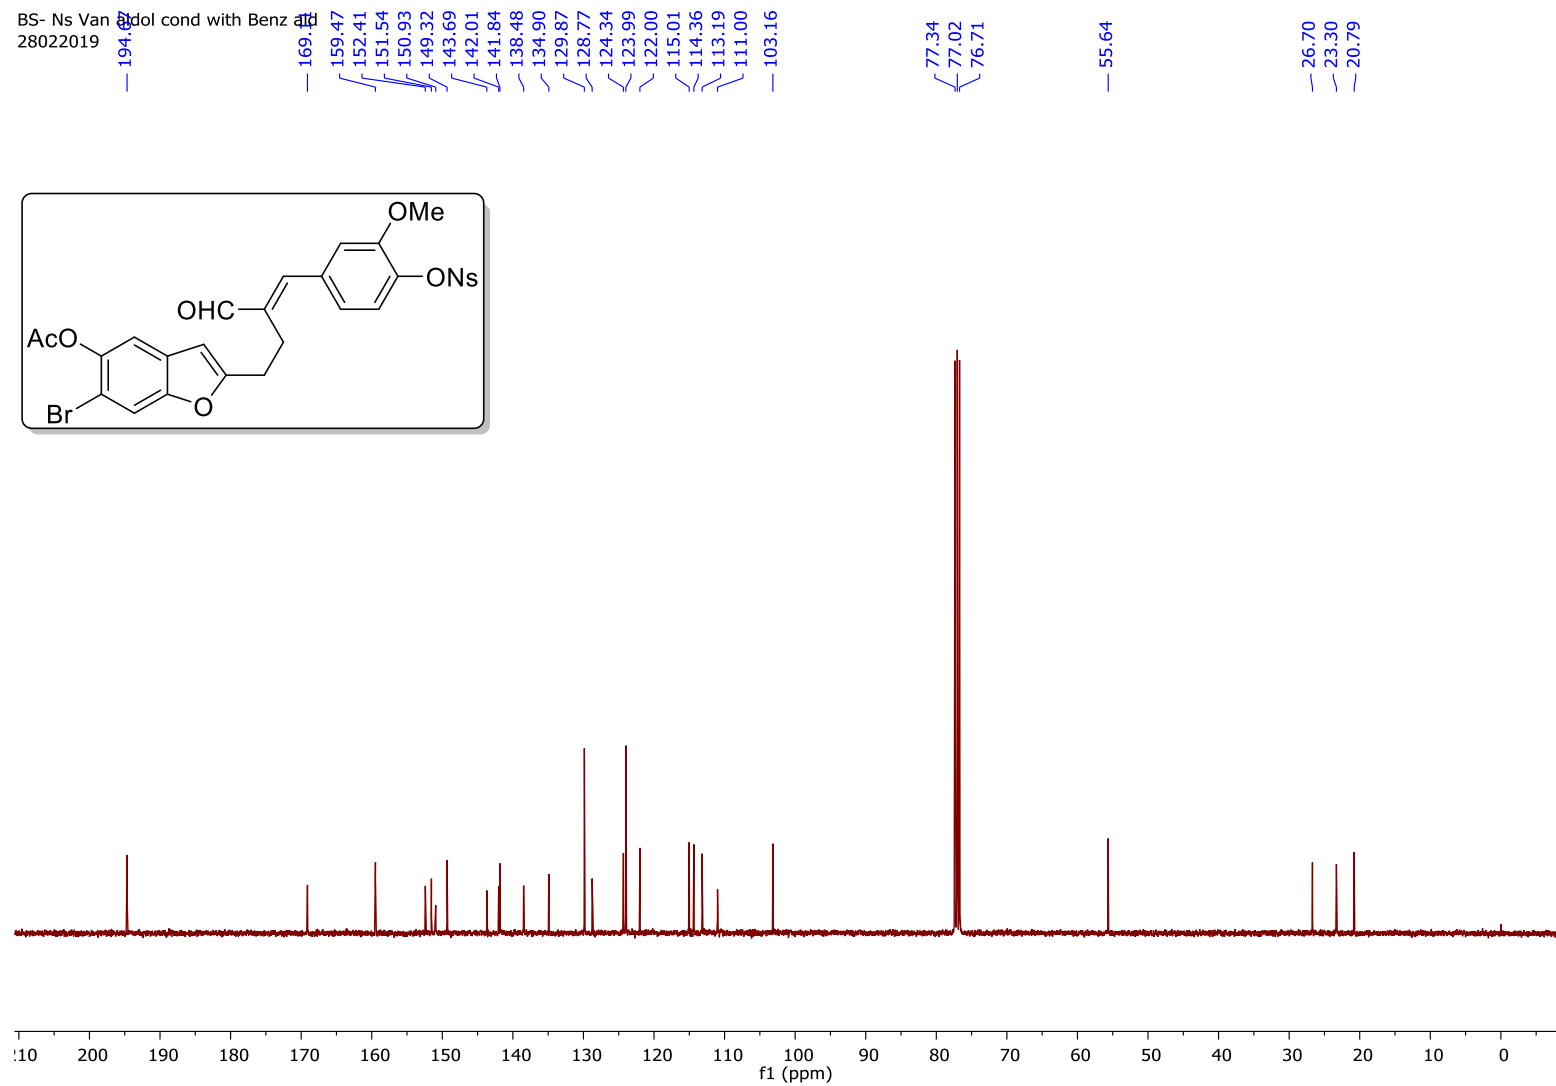

Supplement: d3cc02054a1.pdf [file d3cc02054a1.pdf]
